# Supplementary material for: Molecular Networking and Cultivation Profiling Reveals Diverse Natural Product Classes from an Australian Soil-Derived Fungus Aspergillus sp. CMB-MRF324
Source: MDPI journal article supplement (doi:10.3390/molecules27249066), 2022-12-19
Supplement: s1 [file s1]

## Supplementary Materials

### **Molecular Networking and Cultivation Profiling Reveals Diverse Natural Product Classes from an Australian Soil-Derived Fungus *Aspergillus* sp. CMB-MRF324**

Taizong Wu<sup>1</sup>, Angela A. Salim<sup>1</sup>, Paul V. Bernhardt<sup>2</sup> and Robert J. Capon<sup>1,\*</sup>

<sup>1</sup> Institute for Molecular Bioscience, The University of Queensland, Brisbane, QLD 4072, Australia

<sup>2</sup> School of Chemistry and Molecular Bioscience, The University of Queensland, Brisbane, QLD 4072, Australia

\* Correspondence: r.capon@uq.edu.au; Tel. +61-7-3346-2979

## Table of Contents

|                                                                        |    |
|------------------------------------------------------------------------|----|
| 1. Isolation schemes for pure compounds.....                           | 5  |
| 2. Transformation of <b>8</b> to <b>7</b> with exposure to heat.....   | 6  |
| 3. Marfey's analysis for aspergillamides E-F ( <b>7-8</b> ).....       | 6  |
| 4 Spectroscopic data of <b>7-18</b> .....                              | 7  |
| 4.1 Aspergillamide E ( <b>7a-7b</b> ).....                             | 7  |
| 4.2 Aspergillamide F ( <b>8a-8b</b> ).....                             | 13 |
| 4.3 Asterriquinone SU5228 ( <b>9</b> ).....                            | 19 |
| 4.4 Asterriquinone CT5 ( <b>10</b> ).....                              | 21 |
| 4.5 Aflaquinolone H ( <b>11</b> ).....                                 | 25 |
| 4.6 Aflaquinolone I ( <b>12</b> ).....                                 | 30 |
| 4.7 Terrecyclic acid A ( <b>13</b> ).....                              | 35 |
| 4.8 Aspulvinone Y ( <b>14</b> ).....                                   | 38 |
| 4.9 Aspulvinone N-CR ( <b>15</b> ).....                                | 42 |
| 4.10 Aspulvinone B ( <b>16</b> ).....                                  | 45 |
| 4.11 Aspulvinone D ( <b>17</b> ).....                                  | 46 |
| 4.12 Aspulvinone H ( <b>18</b> ).....                                  | 47 |
| 5. X-ray Crystallography of Aflaquinolone H ( <b>11</b> ).....         | 48 |
| 6. MS/MS fragmentation analysis for aspergillamides related nodes..... | 54 |

## List of Tables

|                                                                                                                          |    |
|--------------------------------------------------------------------------------------------------------------------------|----|
| <b>Table S1.</b> 1D and 2D NMR (600 MHz, DMSO- <i>d</i> <sub>6</sub> ) data for aspergillamide E ( <b>7a</b> ).....      | 7  |
| <b>Table S2.</b> 1D and 2D NMR (600 MHz, DMSO- <i>d</i> <sub>6</sub> ) data for aspergillamide E ( <b>7b</b> ).....      | 8  |
| <b>Table S3.</b> 1D and 2D NMR (600 MHz, DMSO- <i>d</i> <sub>6</sub> ) data for aspergillamide F ( <b>8a</b> ).....      | 13 |
| <b>Table S4.</b> 1D and 2D NMR (600 MHz, DMSO- <i>d</i> <sub>6</sub> ) data for aspergillamide F ( <b>8b</b> ).....      | 14 |
| <b>Table S5.</b> 1D and 2D NMR (600 MHz, DMSO- <i>d</i> <sub>6</sub> ) data for asterriquinone SU5228 ( <b>9</b> ).....  | 19 |
| <b>Table S6.</b> 1D and 2D NMR (600 MHz) data for asterriquinone CT5 ( <b>10</b> ).....                                  | 21 |
| <b>Table S7.</b> 1D and 2D NMR (600 MHz, CDCl <sub>3</sub> ) data for aflaquinolone H ( <b>11</b> ).....                 | 25 |
| <b>Table S8.</b> 1D and 2D NMR (600 MHz, CDCl <sub>3</sub> ) data for aflaquinolone I ( <b>12</b> ).....                 | 30 |
| <b>Table S9.</b> 1D and 2D NMR (600 MHz, DMSO- <i>d</i> <sub>6</sub> ) data for terrecyclic acid A ( <b>13</b> ).....    | 35 |
| <b>Table S10.</b> 1D and 2D NMR (600 MHz, methanol- <i>d</i> <sub>4</sub> ) data for aspulvinone Y ( <b>14</b> ).....    | 38 |
| <b>Table S11.</b> 1D and 2D NMR (600 MHz, acetone- <i>d</i> <sub>6</sub> ) data for aspulvinone N-CR ( <b>15</b> )*..... | 42 |

## List of Figures

|                                                                                                       |   |
|-------------------------------------------------------------------------------------------------------|---|
| <b>Figure S1.</b> Isolation scheme for compounds <b>7-10</b> from CMB-MRF324 SDA culture.....         | 5 |
| <b>Figure S2.</b> Isolation scheme for compounds <b>11-18</b> from CMB-MRF324 brown rice culture..... | 5 |
| <b>Figure S3.</b> Transformation from <b>8</b> to <b>7</b> when exposed to heat (60 °C).....          | 6 |

|                                                                                                                                                                                                                                                                                                                                                                |    |
|----------------------------------------------------------------------------------------------------------------------------------------------------------------------------------------------------------------------------------------------------------------------------------------------------------------------------------------------------------------|----|
| <b>Figure S4.</b> Marfey's analysis for <b>7-8</b> : DAD (340 nm) chromatogram of L-FDAA amino acid derivatives of acid hydrolysate of an aliquot of <b>7</b> (i); <b>8</b> (ii); and standard D-NMe-Phe-L-FDAA derivative (iii), standard D-NMe-Phe-D-FDAA derivative (iv); standard D-Val-L-FDAA derivative (v); standard D-Val-L-FDAA derivative (vi). .... | 6  |
| <b>Figure S5.</b> $^1\text{H}$ NMR (600 MHz, $\text{DMSO-}d_6$ ) spectrum of aspergillamide E ( <b>7a</b> , labelled in black; <b>7b</b> , labelled in red). ....                                                                                                                                                                                              | 9  |
| <b>Figure S6.</b> $^{13}\text{C}$ NMR (150 MHz, $\text{DMSO-}d_6$ ) spectrum of aspergillamide E ( <b>7a</b> , labelled in black; <b>7b</b> , labelled in red). ....                                                                                                                                                                                           | 9  |
| <b>Figure S7.</b> HSQC NMR (600 MHz, $\text{DMSO-}d_6$ ) spectrum of aspergillamide E ( <b>7</b> ). ....                                                                                                                                                                                                                                                       | 10 |
| <b>Figure S8.</b> HMBC NMR (600 MHz, $\text{DMSO-}d_6$ ) spectrum of aspergillamide E ( <b>7</b> ). ....                                                                                                                                                                                                                                                       | 10 |
| <b>Figure S9.</b> COSY NMR (600 MHz, $\text{DMSO-}d_6$ ) spectrum of aspergillamide E ( <b>7</b> ). ....                                                                                                                                                                                                                                                       | 11 |
| <b>Figure S10.</b> ROESY NMR (600 MHz, $\text{DMSO-}d_6$ ) spectrum of aspergillamide E ( <b>7</b> ). ....                                                                                                                                                                                                                                                     | 11 |
| <b>Figure S11.</b> HRMS spectrum and measurement for aspergillamide E ( <b>7</b> ). ....                                                                                                                                                                                                                                                                       | 12 |
| <b>Figure S12.</b> $^1\text{H}$ NMR (600 MHz, $\text{DMSO-}d_6$ ) spectrum of aspergillamide F ( <b>8a</b> , labelled in black; <b>8b</b> , labelled in red). ....                                                                                                                                                                                             | 15 |
| <b>Figure S13.</b> $^{13}\text{C}$ NMR (150 MHz, $\text{DMSO-}d_6$ ) spectrum of aspergillamide F ( <b>8a</b> , labelled in black; <b>8b</b> , labelled in red). ....                                                                                                                                                                                          | 15 |
| <b>Figure S14.</b> HSQC NMR (600 MHz, $\text{DMSO-}d_6$ ) spectrum of aspergillamide F ( <b>8</b> ). ....                                                                                                                                                                                                                                                      | 16 |
| <b>Figure S15.</b> HMBC NMR (600 MHz, $\text{DMSO-}d_6$ ) spectrum of aspergillamide F ( <b>8</b> ). ....                                                                                                                                                                                                                                                      | 16 |
| <b>Figure S16.</b> COSY NMR (600 MHz, $\text{DMSO-}d_6$ ) spectrum of aspergillamide F ( <b>8</b> ). ....                                                                                                                                                                                                                                                      | 17 |
| <b>Figure S17.</b> HMBC NMR (600 MHz, $\text{DMSO-}d_6$ ) spectrum of aspergillamide F ( <b>8</b> ). ....                                                                                                                                                                                                                                                      | 17 |
| <b>Figure S18.</b> HRMS spectrum and measurement for aspergillamide F ( <b>8</b> ). ....                                                                                                                                                                                                                                                                       | 18 |
| <b>Figure S19.</b> $^1\text{H}$ NMR (600 MHz, $\text{DMSO-}d_6$ ) spectrum of asterriquinone SU5228 ( <b>9</b> ). ....                                                                                                                                                                                                                                         | 20 |
| <b>Figure S20.</b> HRMS spectrum and measurement for asterriquinone SU5228 ( <b>9</b> ). ....                                                                                                                                                                                                                                                                  | 20 |
| <b>Figure S21.</b> $^1\text{H}$ NMR (600 MHz, $\text{DMSO-}d_6$ ) spectrum of asterriquinone CT5 ( <b>10</b> ). ....                                                                                                                                                                                                                                           | 22 |
| <b>Figure S22.</b> $^1\text{H}$ NMR (600 MHz, $\text{methanol-}d_4$ ) spectrum of asterriquinone CT5 ( <b>10</b> ). ....                                                                                                                                                                                                                                       | 22 |
| <b>Figure S23.</b> $^1\text{H}$ NMR (600 MHz, $\text{CDCl}_3$ ) spectrum of asterriquinone CT5 ( <b>10</b> ). ....                                                                                                                                                                                                                                             | 23 |
| <b>Figure S24.</b> $^{13}\text{C}$ NMR (150 MHz, $\text{CDCl}_3$ ) spectrum of asterriquinone CT5 ( <b>10</b> ). ....                                                                                                                                                                                                                                          | 23 |
| <b>Figure S25.</b> HRMS spectrum and measurement for asterriquinone CT5 ( <b>10</b> ). ....                                                                                                                                                                                                                                                                    | 24 |
| <b>Figure S26.</b> $^1\text{H}$ NMR (600 MHz, $\text{CDCl}_3$ ) spectrum for aflaquinolone H ( <b>11</b> ). ....                                                                                                                                                                                                                                               | 26 |
| <b>Figure S27.</b> $^{13}\text{C}$ NMR (150 MHz, $\text{CDCl}_3$ ) and UV-vis (inset) spectra for aflaquinolone H ( <b>11</b> ). ...                                                                                                                                                                                                                           | 26 |
| <b>Figure S28.</b> HSQC NMR ( $\text{CDCl}_3$ ) spectrum for aflaquinolone H ( <b>11</b> ). ....                                                                                                                                                                                                                                                               | 27 |
| <b>Figure S29.</b> HMBC NMR ( $\text{CDCl}_3$ ) spectrum for aflaquinolone H ( <b>11</b> ). ....                                                                                                                                                                                                                                                               | 27 |
| <b>Figure S30.</b> COSY NMR ( $\text{CDCl}_3$ ) spectrum for aflaquinolone H ( <b>11</b> ). ....                                                                                                                                                                                                                                                               | 28 |
| <b>Figure S31.</b> ROESY NMR ( $\text{CDCl}_3$ ) spectrum for aflaquinolone H ( <b>11</b> ). ....                                                                                                                                                                                                                                                              | 28 |

|                                                                                                                                                     |    |
|-----------------------------------------------------------------------------------------------------------------------------------------------------|----|
| <b>Figure S32.</b> HRMS spectrum and measurement for aflaquinolone H ( <b>11</b> ). ....                                                            | 29 |
| <b>Figure S33.</b> <sup>1</sup> H NMR (600 MHz, CDCl <sub>3</sub> ) spectrum for aflaquinolone I ( <b>12</b> ). ....                                | 31 |
| <b>Figure S34.</b> <sup>13</sup> C NMR (150 MHz, CDCl <sub>3</sub> ) and UV-vis (inset) spectra for aflaquinolone I ( <b>12</b> ). ...              | 31 |
| <b>Figure S35.</b> HSQC NMR (CDCl <sub>3</sub> ) spectrum for aflaquinolone I ( <b>12</b> ). ....                                                   | 32 |
| <b>Figure S36.</b> HMBC NMR (CDCl <sub>3</sub> ) spectrum for aflaquinolone I ( <b>12</b> ). ....                                                   | 32 |
| <b>Figure S37.</b> COSY NMR (CDCl <sub>3</sub> ) spectrum for aflaquinolone I ( <b>12</b> ). ....                                                   | 33 |
| <b>Figure S38.</b> ROESY NMR (CDCl <sub>3</sub> ) spectrum for aflaquinolone I ( <b>12</b> ). ....                                                  | 33 |
| <b>Figure S39.</b> HRMS spectrum and measurement for aflaquinolone I ( <b>12</b> ). ....                                                            | 34 |
| <b>Figure S40.</b> <sup>1</sup> H NMR (600 MHz, DMSO- <i>d</i> <sub>6</sub> ) spectrum for terrecyclic acid A ( <b>13</b> ). ....                   | 36 |
| <b>Figure S41.</b> <sup>13</sup> C NMR (150 MHz, DMSO- <i>d</i> <sub>6</sub> ) spectrum for terrecyclic acid A ( <b>13</b> ). ....                  | 36 |
| <b>Figure S42.</b> HRMS spectrum and measurement for terrecyclic acid A ( <b>13</b> ). ....                                                         | 37 |
| <b>Figure S43.</b> <sup>1</sup> H NMR (600 MHz, acetone- <i>d</i> <sub>6</sub> ) spectrum for aspulvinone Y ( <b>14</b> ). ....                     | 39 |
| <b>Figure S44.</b> HSQC NMR (600 MHz, acetone- <i>d</i> <sub>6</sub> ) spectrum for aspulvinone Y ( <b>14</b> ). ....                               | 39 |
| <b>Figure S45.</b> HMBC NMR (600 MHz, acetone- <i>d</i> <sub>6</sub> ) spectrum for aspulvinone Y ( <b>14</b> ). ....                               | 40 |
| <b>Figure S46.</b> COSY NMR (600 MHz, acetone- <i>d</i> <sub>6</sub> ) spectrum for aspulvinone Y ( <b>14</b> ). ....                               | 40 |
| <b>Figure S47.</b> HRMS spectrum and measurement for aspulvinone Y ( <b>14</b> ). ....                                                              | 41 |
| <b>Figure S48.</b> <sup>1</sup> H NMR (600 MHz, acetone- <i>d</i> <sub>6</sub> ) spectrum for aspulvinone N-CR ( <b>15</b> ). ....                  | 43 |
| <b>Figure S49.</b> HSQC NMR (600 MHz, acetone- <i>d</i> <sub>6</sub> ) spectrum for aspulvinone N-CR ( <b>15</b> ). ....                            | 43 |
| <b>Figure S50.</b> HMBC NMR (600 MHz, acetone- <i>d</i> <sub>6</sub> ) spectrum for aspulvinone N-CR ( <b>15</b> ). ....                            | 44 |
| <b>Figure S51.</b> HRMS spectrum and measurement for aspulvinone N-CR ( <b>15</b> ). ....                                                           | 44 |
| <b>Figure S52.</b> <sup>1</sup> H NMR (600 MHz, acetone- <i>d</i> <sub>6</sub> ) spectrum for aspulvinone B ( <b>16</b> ). ....                     | 45 |
| <b>Figure S53.</b> HRMS spectrum and measurement for aspulvinone B ( <b>16</b> ). ....                                                              | 45 |
| <b>Figure S54.</b> <sup>1</sup> H NMR (600 MHz, acetone- <i>d</i> <sub>6</sub> ) spectrum for aspulvinone D ( <b>17</b> ). ....                     | 46 |
| <b>Figure S55.</b> HRMS spectrum and measurement for aspulvinone D ( <b>17</b> ). ....                                                              | 46 |
| <b>Figure S56.</b> <sup>1</sup> H NMR (600 MHz, methanol- <i>d</i> <sub>4</sub> ) spectrum for aspulvinone H ( <b>18</b> ). ....                    | 47 |
| <b>Figure S57.</b> HRMS spectrum and measurement for aspulvinone H ( <b>18</b> ). ....                                                              | 47 |
| <b>Figure S58.</b> MS/MS fragmentation and HRMS analysis for aspergillamides E-F ( <b>7-8</b> ). ....                                               | 54 |
| <b>Figure S59.</b> MS/MS fragmentation and HRMS analysis for aspergillamides A-D ( <b>20-21, 30-31</b> ). ....                                      | 54 |
| <b>Figure S60.</b> MS/MS fragmentation and HRMS analysis for aspergillamide(s) i. ....                                                              | 55 |
| <b>Figure S61.</b> MS/MS fragmentation and HRMS analysis for aspergillamide(s) ii. ....                                                             | 55 |
| <b>Figure S62.</b> Chemical shifts of C-8'' and C-9'' for dihydrobenzofuran (yellow highlight) and dihydrobenzopyran (green highlight) moiety ..... | 56 |

## 1. Isolation schemes for pure compounds

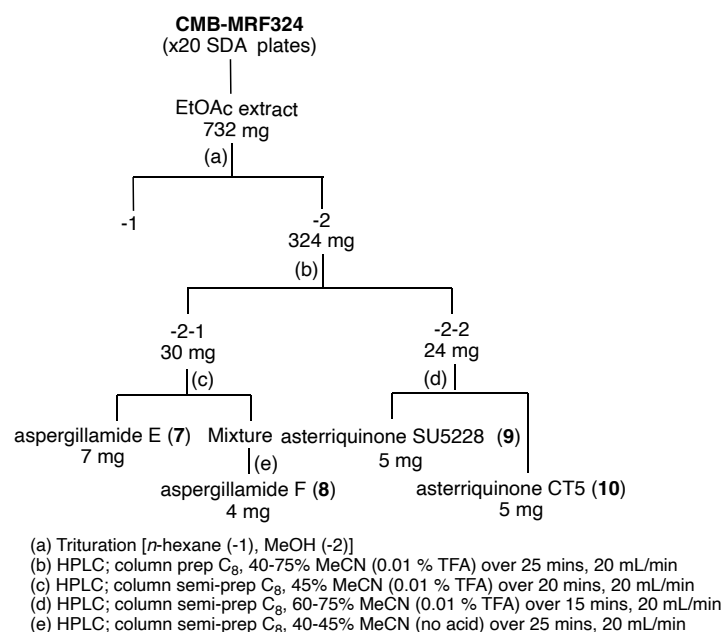

**Figure S1.** Isolation scheme for compounds **7-10** from CMB-MRF324 SDA culture.

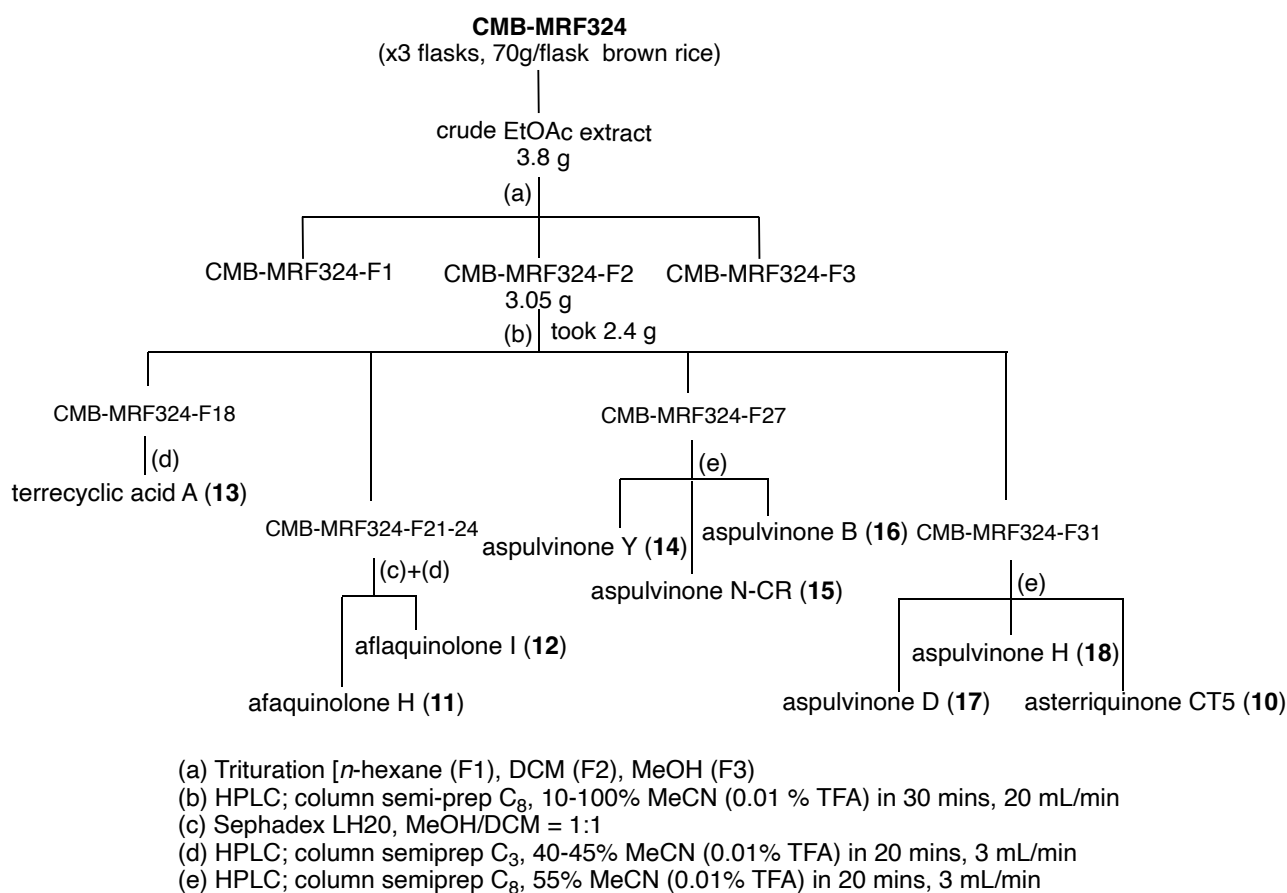

**Figure S2.** Isolation scheme for compounds **11-18** from CMB-MRF324 brown rice culture.

## 2. Transformation of 8 to 7 with exposure to heat

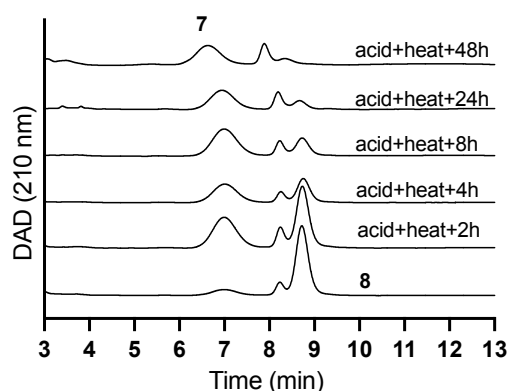

**Figure S3.** Transformation from **8** to **7** when exposed to heat (60 °C).

## 3. Marfey's analysis for aspergillamides E-F (7-8)

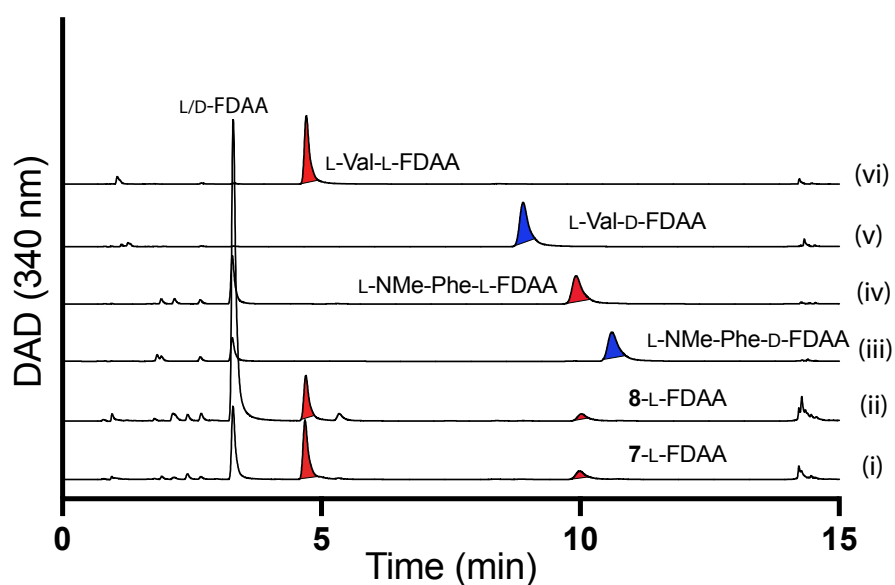

**Figure S4.** Marfey's analysis for **7-8**: DAD (340 nm) chromatogram of L-FDAA amino acid derivatives of acid hydrolysate of an aliquot of **7** (i); **8** (ii); and standard D-NMe-Phe-L-FDAA derivative (iii), standard D-NMe-Phe-D-FDAA derivative (iv); standard D-Val-L-FDAA derivative (v); standard D-Val-L-FDAA derivative (vi).

## 4 Spectroscopic data of 7-18

### 4.1 Aspergillamide E (7a-7b)

**Table S1.** 1D and 2D NMR (600 MHz, DMSO-*d*<sub>6</sub>) data for aspergillamide E (7a)

|                    | Pos.         | $\delta_{\text{H}}$ , mult, ( <i>J</i> in Hz) | $\delta_{\text{C}}$ | COSY    | ROESY                     | HMBC                         |
|--------------------|--------------|-----------------------------------------------|---------------------|---------|---------------------------|------------------------------|
| enamino-Trp        | 2            | 7.42, d (2.2)                                 | 123.5               | 1-NH    | 8, 1-NH                   | 7a, 3, 3a, 8                 |
|                    | 3            |                                               | 111.5               |         |                           |                              |
|                    | 3a           |                                               | 124.8               |         |                           |                              |
|                    | 4            | 7.61, d (7.7)                                 | 118.9               | 5       |                           | 7a, 3, 3a, 6                 |
|                    | 5            | 7.07, dd (7.7, 7.7)                           | 119.3               | 4       |                           | 3a, 7                        |
|                    | 6            | 7.12, m                                       | 121.4               | 7       |                           | 7a, 4                        |
|                    | 7            | 7.38, d (8.0)                                 | 111.8               | 6       |                           | 3a, 5                        |
|                    | 7a           |                                               | 136.8               |         |                           |                              |
|                    | 8            | 6.42, d (15.0)                                | 106.8               | 9       | 2, 9-NH                   | 2, 3a, 9                     |
|                    | 9            | 7.27, dd (15.0, 9.9)                          | 119.5               | 8, 9-NH |                           | 3, 8, 10                     |
|                    | 1-NH         | 11.1, d (2.2)                                 |                     | 2       | 2                         | 7a, 3, 3a                    |
|                    | 9-NH         | 9.93, d (9.9)                                 |                     | 9       | 8, Phe-2, Phe-3a          | 8, 10                        |
| <i>N</i> -Me-L-Phe | 1            |                                               | 167.0               |         |                           |                              |
|                    | 2            | 5.27, dd (9.6, 6.1)                           | 57.7                | 2a, 3b  | 3a, 3b, 5, 9-NH           | 1, 3, 4, <i>N</i> -Me, Val-1 |
|                    | 3            | a. 3.23, dd (14.3, 6.1)                       | 34.1                | 2, 3b   | 2, 5, 9-NH                | 1, 2, 4, 5                   |
|                    |              | b. 2.97, dd (14.3, 9.6)                       |                     | 2, 3a   | 2, 5                      | 2, 4, 5                      |
|                    | 4            |                                               | 137.6               |         |                           |                              |
|                    | 5            | 7.21, d (7.1)                                 | 128.8               |         |                           | 3, 7                         |
|                    | 6            | 7.24, dd (7.1, 7.1)                           | 128.1               |         |                           | 4                            |
|                    | 7            | 7.18, t (7.1)                                 | 126.3               |         |                           | 5                            |
|                    | <i>N</i> -Me | 3.08, s                                       | 32.3                |         | 2, 5, Val-2, Val-4, Val-5 | 2, Val-1                     |
| L-Val              | 1            |                                               | 172.4               |         |                           |                              |
|                    | 2            | 4.44, dd (8.7, 8.7)                           | 54.0                | 3, NH   | <i>N</i> -Me, 4, 5        | 3, 4, 5                      |
|                    | 3            | 1.90, dq (8.7, 6.9, 6.9)                      | 30.0                | 2, 3, 4 | NH                        | 2, 4, 5                      |
|                    | 4            | 0.81, d (6.9)                                 | 18.4                | 3       | <i>N</i> -Me, 2           | 2, 3, 5                      |
|                    | 5            | 0.84, d (6.9)                                 | 18.9                | 3       | 2, NH                     | 2, 3, 4                      |
|                    | NH           | 7.97, d (8.7)                                 |                     | 2       | 3, 4, 5, <i>N</i> -acetyl | 2, 3, <i>N</i> -acetyl       |
|                    | NHAc         |                                               | 169.1               |         |                           |                              |
|                    |              | 1.79, s                                       | 22.2                |         | Val-NH                    |                              |

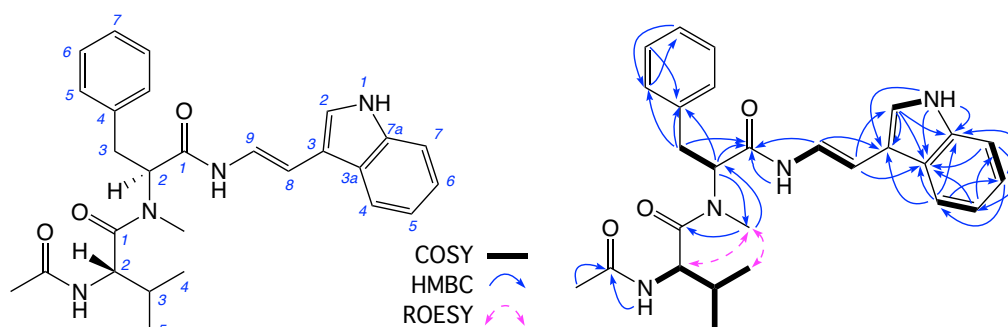

**Table S2.** 1D and 2D NMR (600 MHz, DMSO-*d*<sub>6</sub>) data for aspergillamide E (**7b**)

|                    | Pos. | $\delta_{\text{H}}$ , mult, ( <i>J</i> in Hz) | $\delta_{\text{C}}$ | COSY    | ROESY                  | HMBC                |
|--------------------|------|-----------------------------------------------|---------------------|---------|------------------------|---------------------|
| enamino-Trp        | 2    | 7.45, d (2.2)                                 | 123.6               | 1-NH    | 8, 1-NH                | 7a, 3, 3a           |
|                    | 3    |                                               | 111.4               |         |                        |                     |
|                    | 3a   |                                               | 124.9               |         |                        |                     |
|                    | 4    | 7.62, d (7.7)                                 | 118.8               | 5       |                        | 7a, 3, 3a, 6        |
|                    | 5    | 7.11, m                                       | 119.3               | 4       |                        |                     |
|                    | 6    | 7.07, m                                       | 121.4               | 7       |                        |                     |
|                    | 7    | 7.36, d (8.0)                                 | 111.8               | 6       |                        | 3a, 5               |
|                    | 7a   |                                               | 136.8               |         |                        |                     |
|                    | 8    | 6.52, d (15.0)                                | 107.0               | 9       | 2, 9-NH                | 2, 3a, 9            |
|                    | 9    | 7.32, dd (15.0, 9.9)                          | 119.5               | 8       |                        | 3, 8, Phe-1         |
|                    | 1-NH | 11.1, d (2.2)                                 |                     | 2       | 2                      | 7a, 3, 3a           |
|                    | 9-NH | 9.92, d (9.9)                                 |                     | 9       | 8, Phe-2               | 8, Phe-1            |
| <i>N</i> -Me-L-Phe | 1    |                                               | 166.1               |         |                        |                     |
|                    | 2    | 4.98, dd (9.6, 5.2)                           | 61.3                | 3a, 3b  | 9-NH, 3a, 3b, 5, Val-2 | 1, 3, 4, N-Me, Val- |
|                    | 3    | a. 3.32 <sup>A</sup>                          | 34.2                |         |                        |                     |
|                    |      | b. 2.95, d (14.3, 6.1)                        |                     |         | 2, 5                   | 1, 2, 4, 5          |
|                    | 4    |                                               | 137.8               |         |                        |                     |
|                    | 5    | 7.29, d (7.1)                                 | 129.3               |         |                        |                     |
|                    | 6    | 7.30, dd (7.1, 7.1)                           | 128.4               |         |                        |                     |
|                    | 7    | 7.22, t (7.1)                                 | 126.5               |         |                        |                     |
|                    | N-Me | 2.81, s                                       | 29.3                |         |                        | 2, Val-1            |
|                    |      |                                               |                     |         |                        |                     |
| Val                | 1    |                                               | 171.5               |         |                        |                     |
|                    | 2    | 4.29, dd (7.6, 7.6)                           | 53.6                | 3, NH   | Phe-2, Phe-5, 3, 4, 5  | 3, 4, 5             |
|                    | 3    | 1.23, dq (7.6, 6.9, 6.9)                      | 28.7                | 2, 24/5 | NH                     | 2, 4, 5             |
|                    | 4    | 0.63, d (6.9)                                 | 17.5                | 3       | 2, NH                  | 2, 3, 4             |
|                    | 5    | 0.48, d (6.9)                                 | 19.3                | 3       | 2, NH                  | 2, 3, 4             |
|                    | NH   | 8.26, d (7.6)                                 |                     | 2       | N-acetyl               | 2, N-acetyl         |
|                    | NHAc |                                               | 170.6               |         |                        |                     |
|                    |      | 1.91, s                                       | 22.2                |         | Val-NH                 |                     |

<sup>A</sup> Resonance under H<sub>2</sub>O peak, detected by HSQC.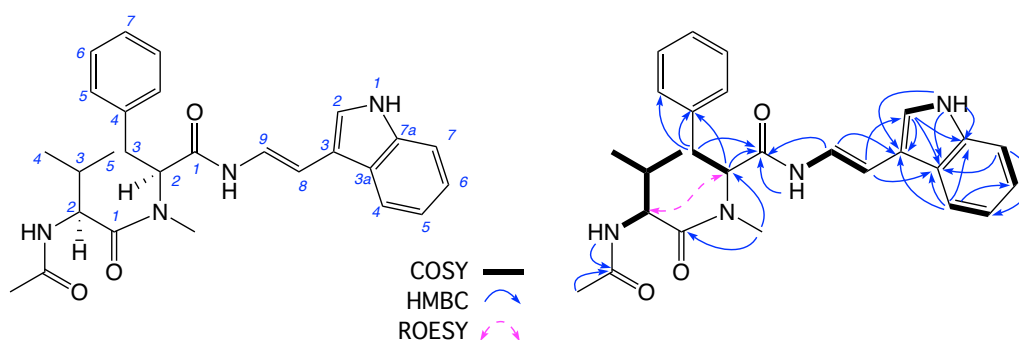

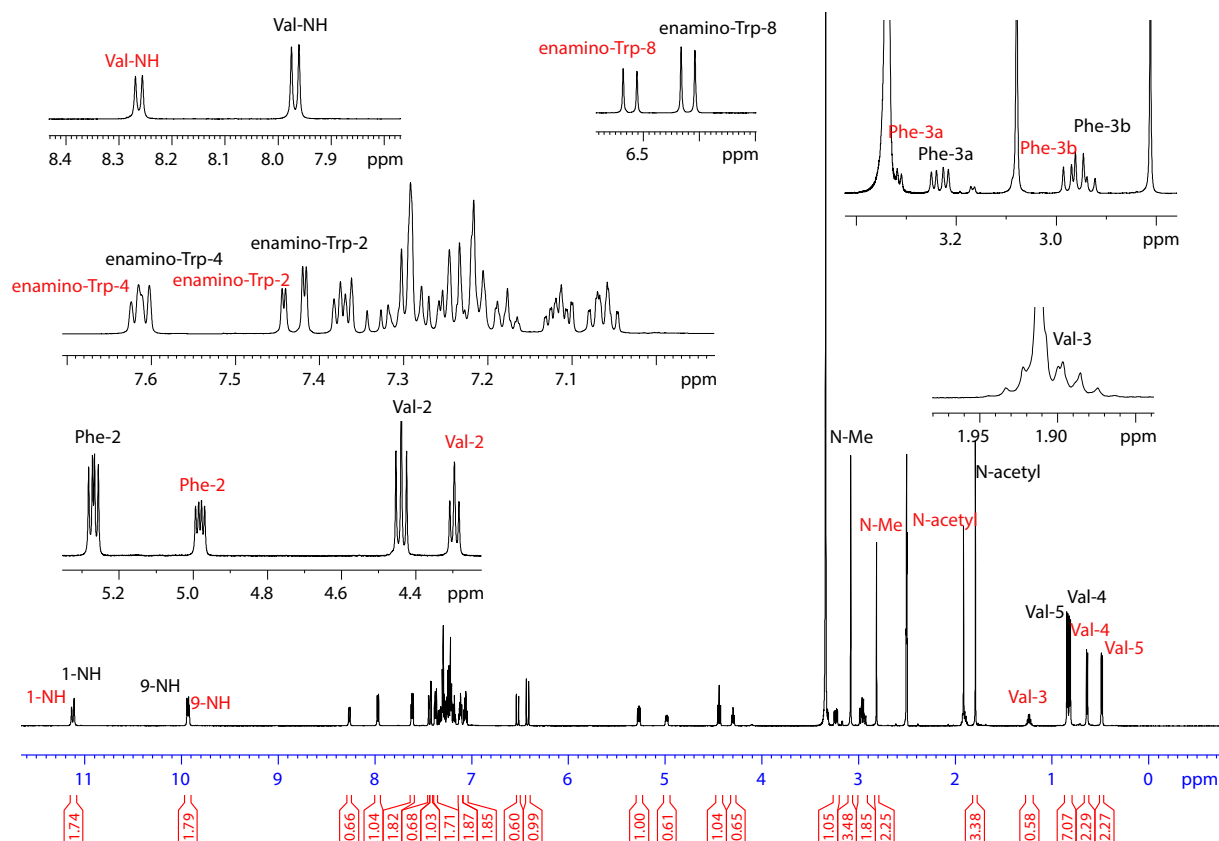

**Figure S5.**  $^1\text{H}$  NMR (600 MHz,  $\text{DMSO}-d_6$ ) spectrum of aspergillamide E (7a, labelled in black; 7b, labelled in red).

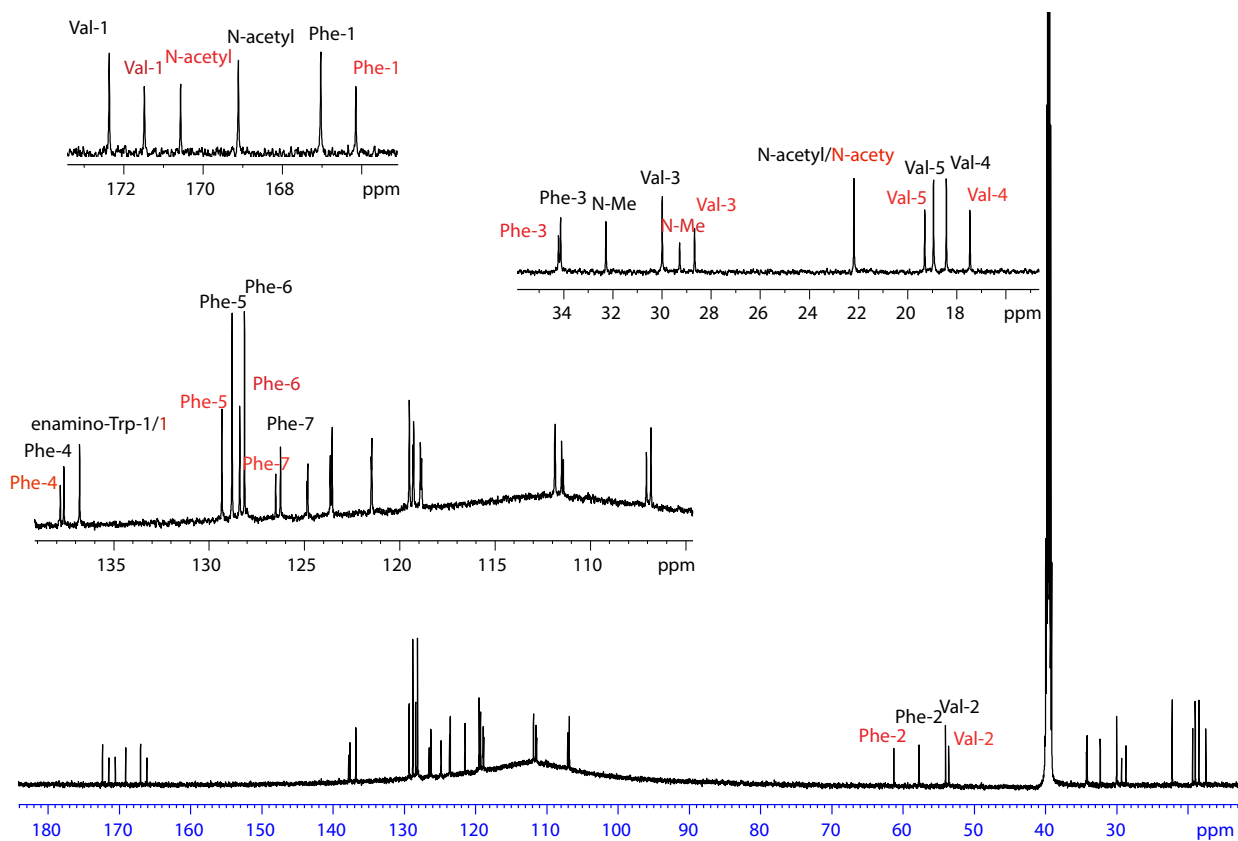

**Figure S6.**  $^{13}\text{C}$  NMR (150 MHz,  $\text{DMSO}-d_6$ ) spectrum of aspergillamide E (7a, labelled in black; 7b, labelled in red).

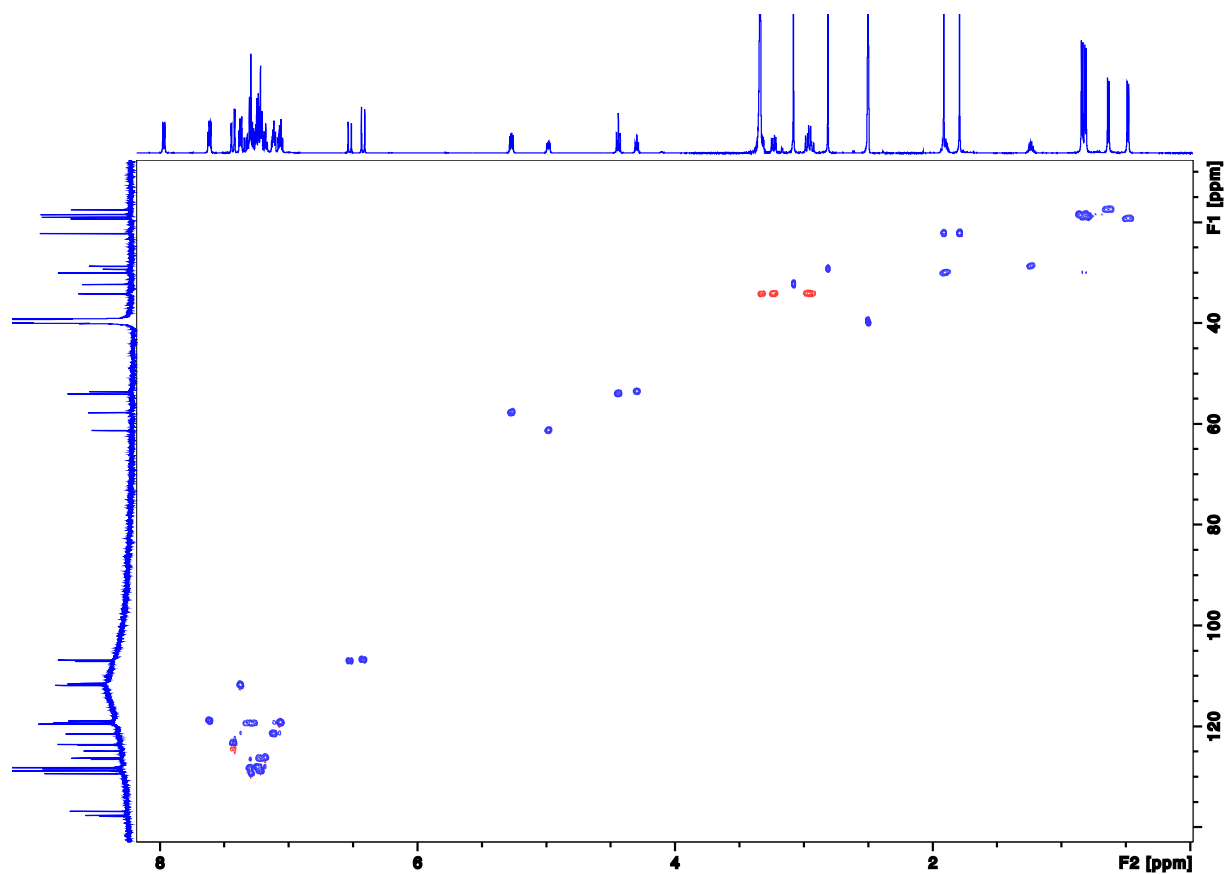

**Figure S7.** HSQC NMR (600 MHz, DMSO- $d_6$ ) spectrum of aspergillamide E (7).

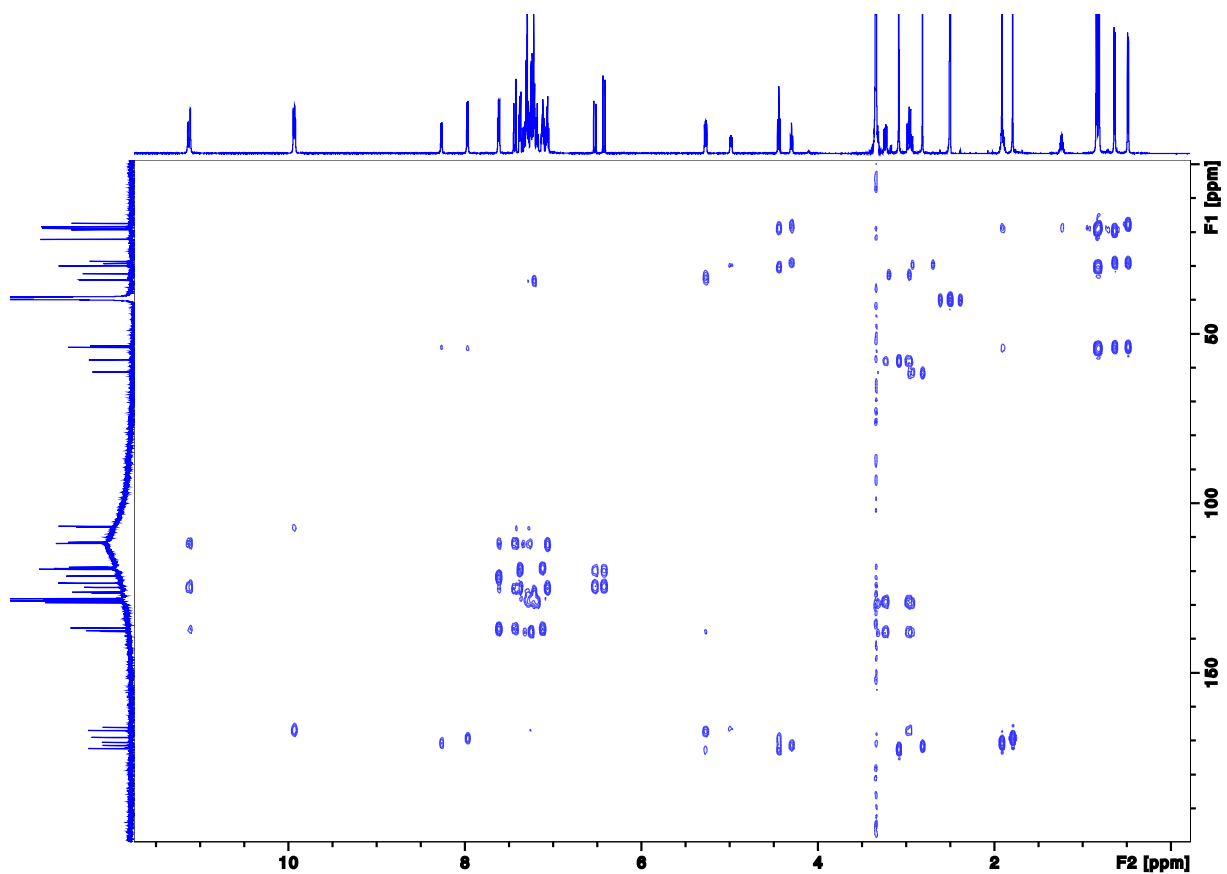

**Figure S8.** HMBC NMR (600 MHz, DMSO- $d_6$ ) spectrum of aspergillamide E (7).

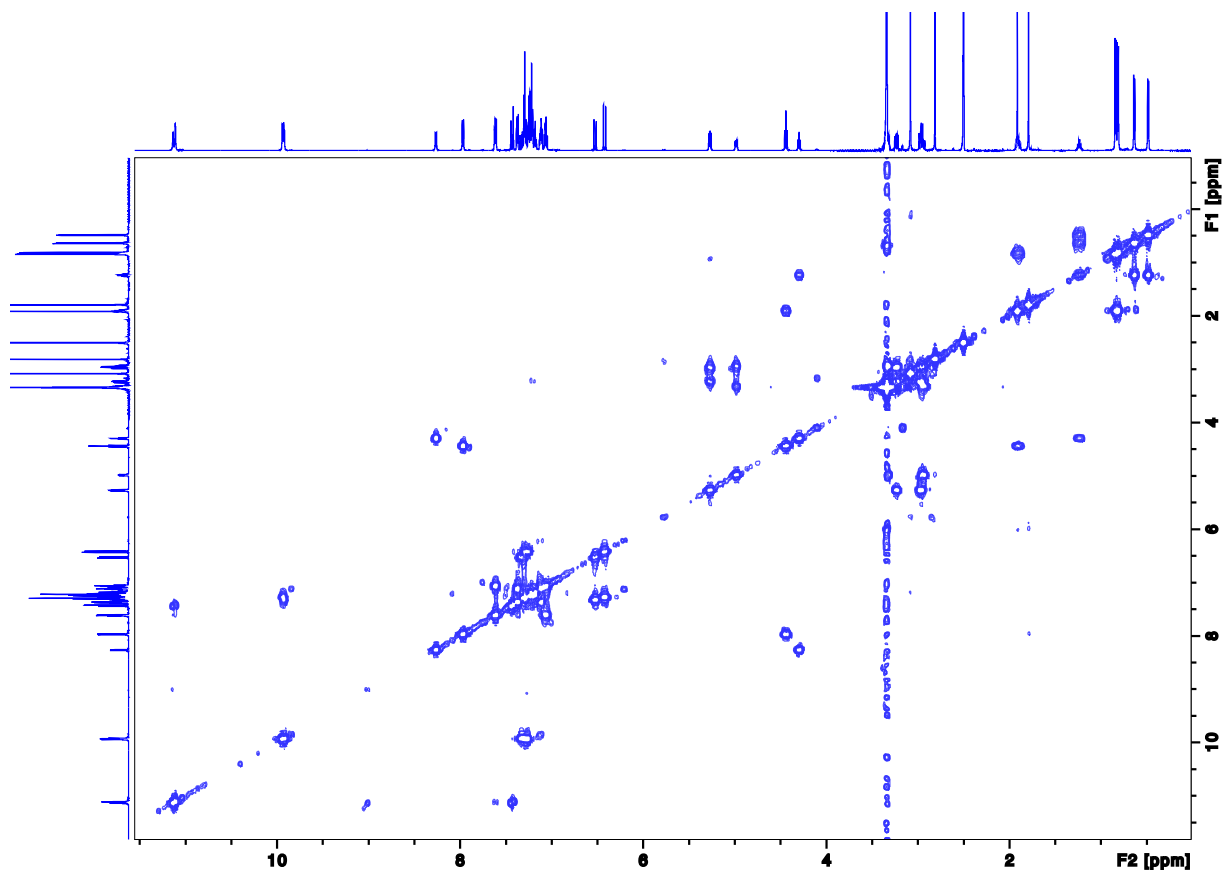

**Figure S9.** COSY NMR (600 MHz, DMSO-*d*<sub>6</sub>) spectrum of aspergillamide E (7).

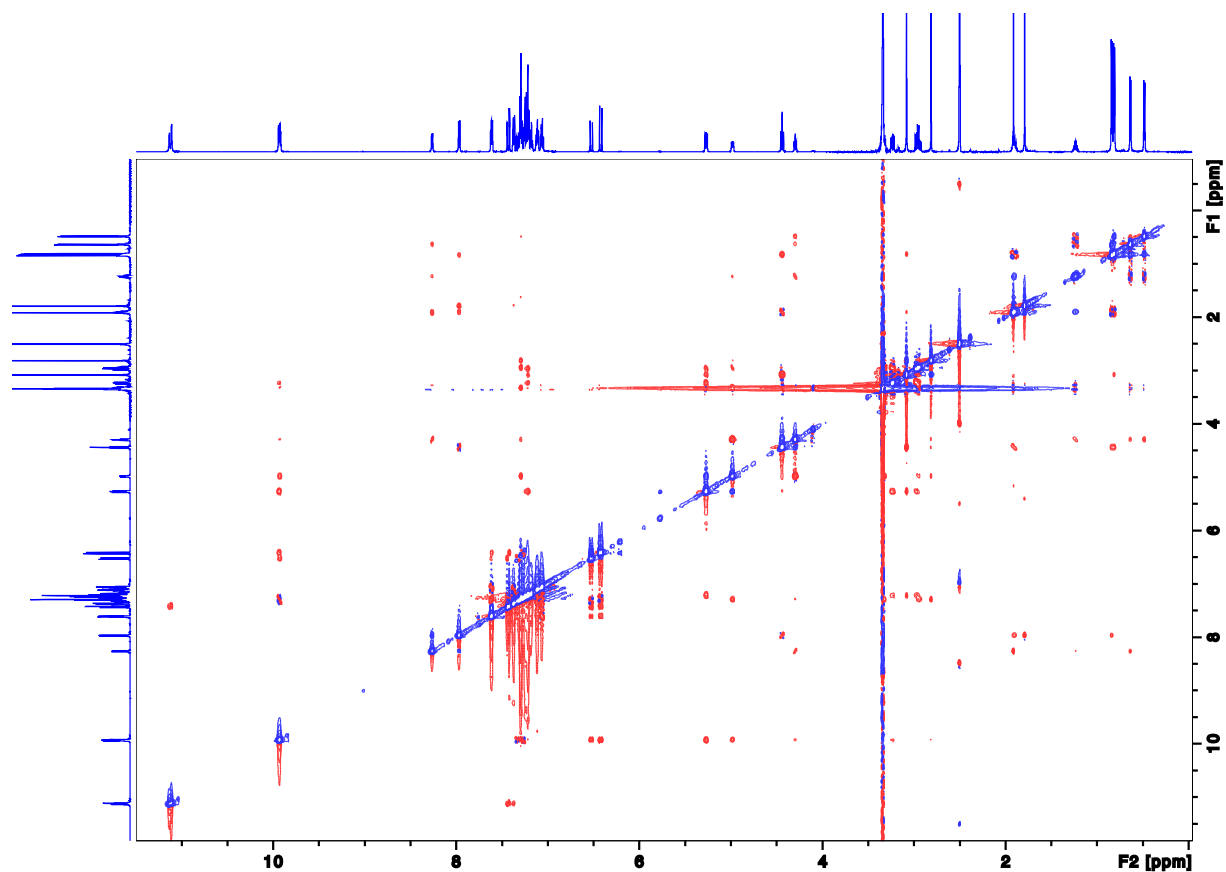

**Figure S10.** ROESY NMR (600 MHz, DMSO-*d*<sub>6</sub>) spectrum of aspergillamide E (7).

## Mass Spectrum Molecular Formula Report

### Analysis Info

Analysis Name D:\Data\Taizong\MRF324\_com1a.d  
 Method tune-med\_AP.m  
 Sample Name MRF324\_com1a  
 Comment

Acquisition Date 1/13/2020 11:35:19 AM

Operator a.salim  
 Instrument / Ser# microTOF 213750.00  
 232

### Acquisition Parameter

|             |            |                      |          |                  |           |
|-------------|------------|----------------------|----------|------------------|-----------|
| Source Type | ESI        | Ion Polarity         | Positive | Set Nebulizer    | 0.8 Bar   |
| Focus       | Not active |                      |          | Set Dry Heater   | 180 °C    |
| Scan Begin  | 100 m/z    | Set Capillary        | 4500 V   | Set Dry Gas      | 5.0 l/min |
| Scan End    | 1000 m/z   | Set End Plate Offset | -500 V   | Set Divert Valve | Source    |

### Generate Molecular Formula Parameter

Formula, min.  
 Formula, max.  
 Measured m/z  
 Check Valence  
 Nitrogen Rule  
 Filter H/C Ratio  
 Estimate Carbon

Tolerance  
 Minimum  
 Electron Configuration  
 Minimum

Charge  
 Maximum  
 Maximum

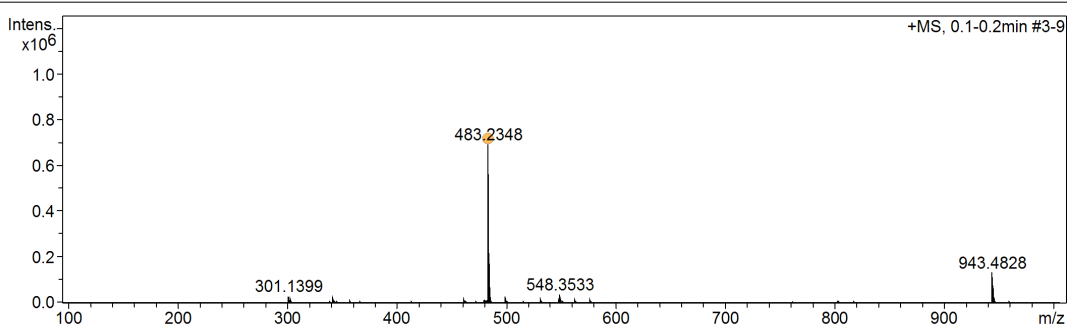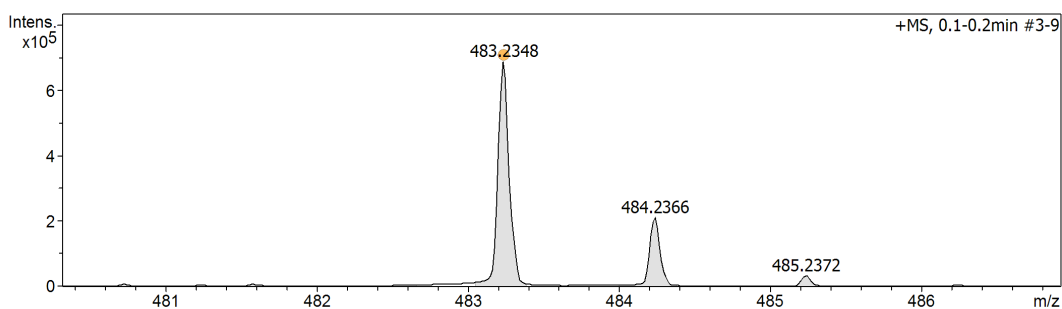

| Meas. m/z | # | Ion Formula  | m/z      | err [ppm] | mSigma | # Sigma | Score  | rdb  | e <sup>-</sup> Conf | N-Rule |
|-----------|---|--------------|----------|-----------|--------|---------|--------|------|---------------------|--------|
| 483.2348  | 1 | C27H32N4NaO3 | 483.2367 | 3.8       | 3.7    | 1       | 49.49  | 13.5 | even                | ok     |
|           | 2 | C23H28N10NaO | 483.2340 | 1.7       | 9.2    | 2       | 86.58  | 14.5 | even                | ok     |
|           | 3 | C26H36NaO7   | 483.2353 | 1.1       | 9.8    | 3       | 100.00 | 8.5  | even                | ok     |
|           | 4 | C22H32N6NaO5 | 483.2326 | 4.5       | 20.6   | 4       | 28.38  | 9.5  | even                | ok     |
|           | 5 | C21H36N2NaO9 | 483.2313 | -7.2      | 32.2   | 5       | 6.20   | 4.5  | even                | ok     |

**Figure S11.** HRMS spectrum and measurement for aspergillamide E (7).

## 4.2 Aspergillamide F (8a-8b)

**Table S3.** 1D and 2D NMR (600 MHz, DMSO-*d*<sub>6</sub>) data for aspergillamide F (**8a**)

|                    | Pos.         | $\delta_{\text{H}}$ , mult, ( <i>J</i> in Hz)      | $\delta_{\text{C}}$ | COSY           | ROESY                  | HMBC                         |
|--------------------|--------------|----------------------------------------------------|---------------------|----------------|------------------------|------------------------------|
| enamino-Trp        | 2            | 7.53, d (2.3)                                      | 123.6               | 1-NH           | 9-NH, 1-NH             | 7a, 3, 4                     |
|                    | 3            |                                                    | 109.5               |                |                        |                              |
|                    | 3a           |                                                    | 126.5               |                |                        |                              |
|                    | 4            | 7.57, d (7.9)                                      | 118.3               | 5              | 9                      | 7a, 3, 6                     |
|                    | 5            | 7.02, dd (7.9, 7.3)                                | 119.1               | 4              |                        | 3a, 7                        |
|                    | 6            | 7.12, dd (7.9, 7.3)                                | 121.6               | 7              |                        | 7a, 4                        |
|                    | 7            | 7.38, d (7.9)                                      | 111.5               | 6              |                        | 3a, 5                        |
|                    | 7a           |                                                    | 135.6               |                |                        |                              |
|                    | 8            | 5.95, d (9.5)                                      | 103.3               | 9              | 5, 10                  | 2, 3a                        |
|                    | 9            | 6.64, dd (10.2, 9.5)                               | 118.1               | 8, 9-NH        | 9                      | 3, 8, Phe-1                  |
|                    | 1-NH         | 11.29, br s                                        |                     | 2              | 2, 7                   | 7a, 2, 3, 3a                 |
|                    | 9-NH         | 9.01, d (10.2)                                     |                     | 9              | 2, Phe-2               | Phe-1                        |
| <i>N</i> -Me-L-Phe | 1            |                                                    | 168.4               |                |                        |                              |
|                    | 2            | 5.53, dd (9.9, 6.0)                                | 56.8                | 3a, 3b         | 3a, 3b, 5, 9-NH        | 1, 3, 4, <i>N</i> -Me, Val-1 |
|                    | 3            | a. 3.23, dd (15.0, 6.0)<br>b. 3.00, dd (15.0, 9.9) | 33.5                | 2, 3b<br>2, 3a | 2, 5<br>2, 5           | 2, 4, 5<br>2, 4, 5           |
|                    | 4            |                                                    | 137.4               |                |                        |                              |
|                    | 5            | 7.22, dd (7.1, 7.1)                                | 128.8               |                | 2, 3a, 3b              | 3, 7                         |
|                    | 6            | 7.23, d (7.1)                                      | 128.1               |                |                        | 4, 5                         |
|                    | 7            | 7.17, (7.1)                                        | 126.3               |                |                        | 5                            |
|                    | <i>N</i> -Me | 3.03, s                                            | 31.6                |                | 2, Val-3, Val-4        | 2, Val-1                     |
| L-Val              | 1            |                                                    | 172.8               |                |                        |                              |
|                    | 2            | 4.46, dd (8.9, 8.9)                                | 53.6                | 3, NH          | 4, 5                   | 1, 3, 4, 5, <i>N</i> -acetyl |
|                    | 3            | 1.89, dq (8.9, 6.7, 6.7)                           | 30.0                | 2, 4, 5        | NH                     | 2, 4, 5                      |
|                    | 4            | 0.72, d (6.7)                                      | 18.9                | 3              | 2                      | 2, 3, 5                      |
|                    | 5            | 0.77, d (6.7)                                      | 18.2                | 3              | 2, NH                  | 2, 3, 4                      |
|                    | NH           | 7.9, d (8.9)                                       |                     | 2              | 3, 5, <i>N</i> -acetyl | <i>N</i> -acetyl             |
|                    | NHAc         |                                                    | 168.8               |                |                        |                              |
|                    |              | 1.73, s                                            | 22.1                |                | NH                     |                              |

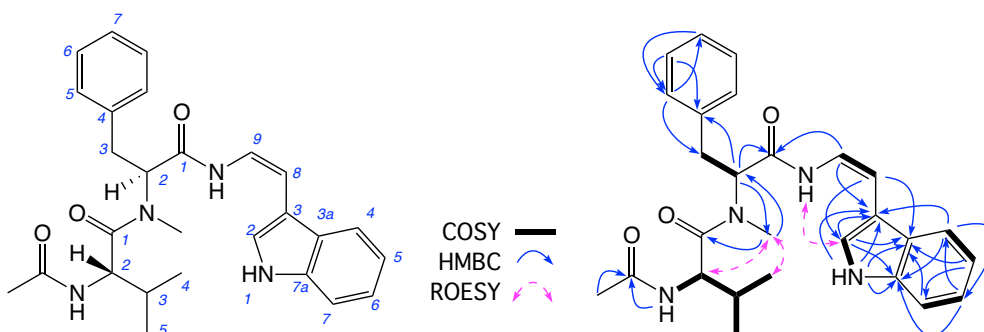

**Table S4.** 1D and 2D NMR (600 MHz, DMSO-*d*<sub>6</sub>) data for aspergillamide F (**8b**)

|                    | Pos. | $\delta_{\text{H}}$ , mult, ( <i>J</i> in Hz)   | $\delta_{\text{C}}$ | COSY        | ROESY              | HMBC                 |
|--------------------|------|-------------------------------------------------|---------------------|-------------|--------------------|----------------------|
| enamino-Trp        | 2    | 7.71, d (2.3)                                   | 124.4               | 1-NH        | 1-NH, 9-NH         | 7a, 3, 3a            |
|                    | 3    |                                                 | 109.2               |             |                    |                      |
|                    | 3a   |                                                 | 126.6               |             |                    |                      |
|                    | 4    | 7.57 <sup>A</sup>                               | 118.3               | 5           | 8                  | 7a, 3, 6             |
|                    | 5    | 7.03 <sup>A</sup>                               | 119.1               | 4           |                    | 3a, 7                |
|                    | 6    | 7.12 <sup>A</sup>                               | 121.5               | 7           |                    | 7a, 4                |
|                    | 7    | 7.37, d (8.3)                                   | 111.4               | 6           |                    | 3a, 5                |
|                    | 7a   |                                                 | 135.6               |             |                    |                      |
|                    | 8    | 5.99, d (9.5)                                   | 104.2               | 9           | 4, 9               | 2, 3a                |
|                    | 9    | 6.61, dd (9.8, 9.5)                             | 117.9               | 8, 9-NH     | 8                  | 3, 8, Phe-1          |
|                    | 1-NH | 11.30, br s                                     |                     | 2           | 2, 7               | 7a, 2, 3, 3a         |
|                    | 9-NH | 9.23, d (9.8)                                   |                     | 9           | 2, Phe-2           | Phe-1                |
| <i>N</i> -Me-L-Phe | 1    |                                                 | 167.6               |             |                    |                      |
|                    | 2    | 5.30, dd (8.8, 6.0)                             | 60.6                | 3a, 3b      | 9-NH, 3b, 5, Val-2 | 1, 3, 4, N-Me, Val-1 |
|                    | 3    | a. 3.37 <sup>B</sup><br>b. 2.96, dd (14.4, 8.8) | 35.4                | 3b<br>2, 3a |                    | 4, 5<br>2, 4, 5      |
|                    | 4    |                                                 | 137.5               |             |                    |                      |
|                    | 5    | 7.31, d (7.0)                                   | 129.3               |             | 2, 3a, 3b          | 3, 7                 |
|                    | 6    | 7.29, dd (7.0, 7.0)                             | 128.3               |             |                    | 4, 5                 |
|                    | 7    | 7.22 <sup>A</sup>                               | 126.5               |             |                    | 5                    |
|                    | N-Me | 2.89, s                                         | 29.7                |             | 2                  | 2, Val-1             |
|                    |      |                                                 |                     |             |                    |                      |
|                    |      |                                                 |                     |             |                    |                      |
| L-Val              | 1    |                                                 | 171.8               |             |                    |                      |
|                    | 2    | 4.26, dd (8.1, 8.1)                             | 54.0                | 3, NH       | Phe-2, 3, 4, 5     | 1, 3, 4, 5, N-acetyl |
|                    | 3    | 1.56, dq (8.1, 6.8, 6.8)                        | 29.2                | 2, 4, 5     | 2, NH              | 2, 4, 5              |
|                    | 4    | 0.48, d (6.8)                                   | 19.3                | 3           | 2                  | 2, 3, 5              |
|                    | 5    | 0.69, d (6.8)                                   | 18.0                | 3           | 2, 2-NH            | 2, 3, 4              |
|                    | NH   | 8.24, d (8.1)                                   |                     | 2           | 3, 5, N-acetyl     | N-acetyl             |
|                    | NHAc |                                                 | 170.2               |             |                    |                      |
|                    |      | 1.66, s                                         | 21.7                |             | NH                 |                      |

<sup>A</sup> *E/Z* amide rotamer resonances overlapping; <sup>B</sup> Resonance obscured by residual H<sub>2</sub>O and detected by HSQC

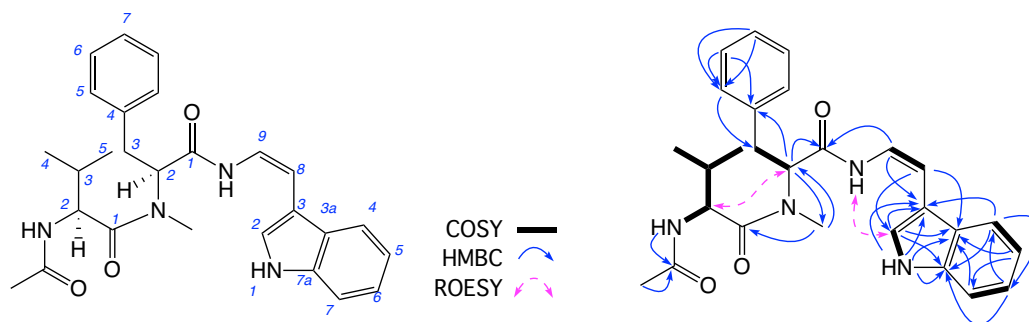

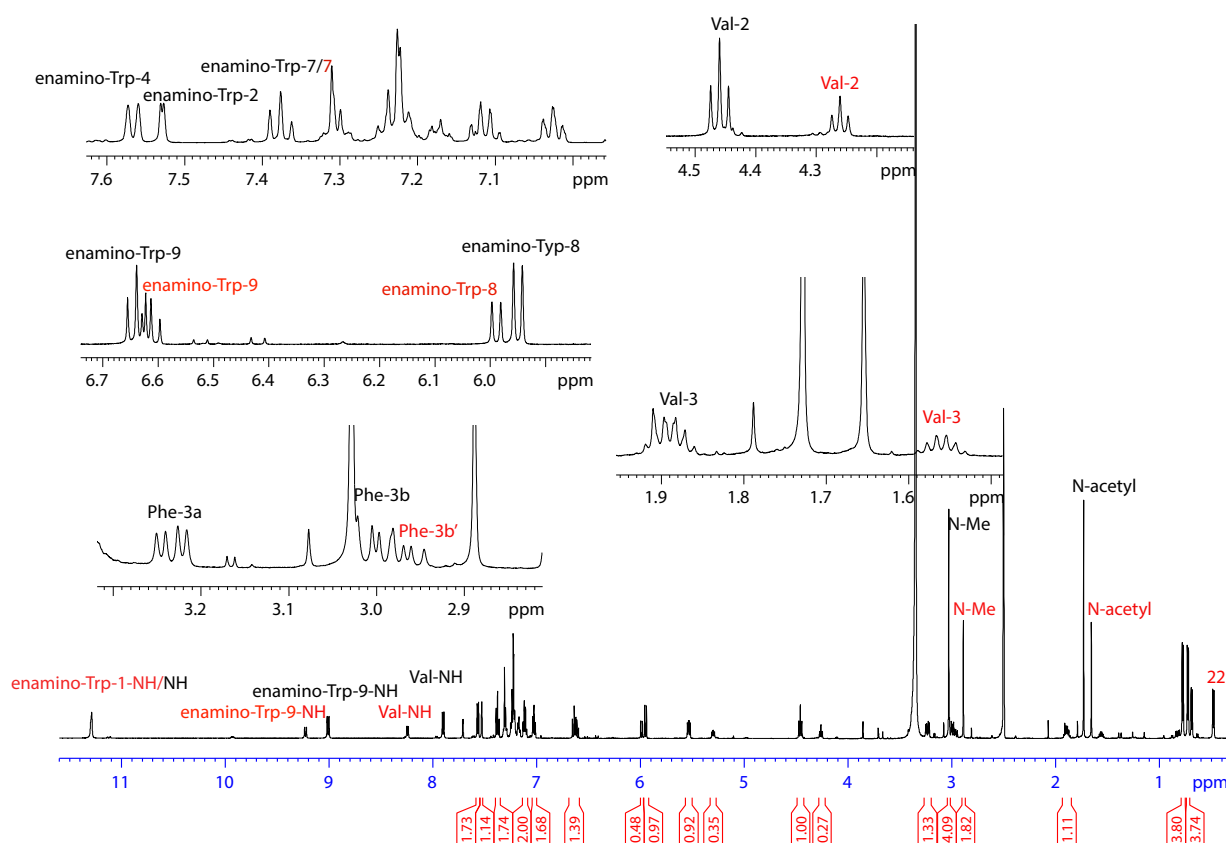

**Figure S12.**  $^1\text{H}$  NMR (600 MHz,  $\text{DMSO-}d_6$ ) spectrum of aspergillamide F (**8a**, labelled in black; **8b**, labelled in red).

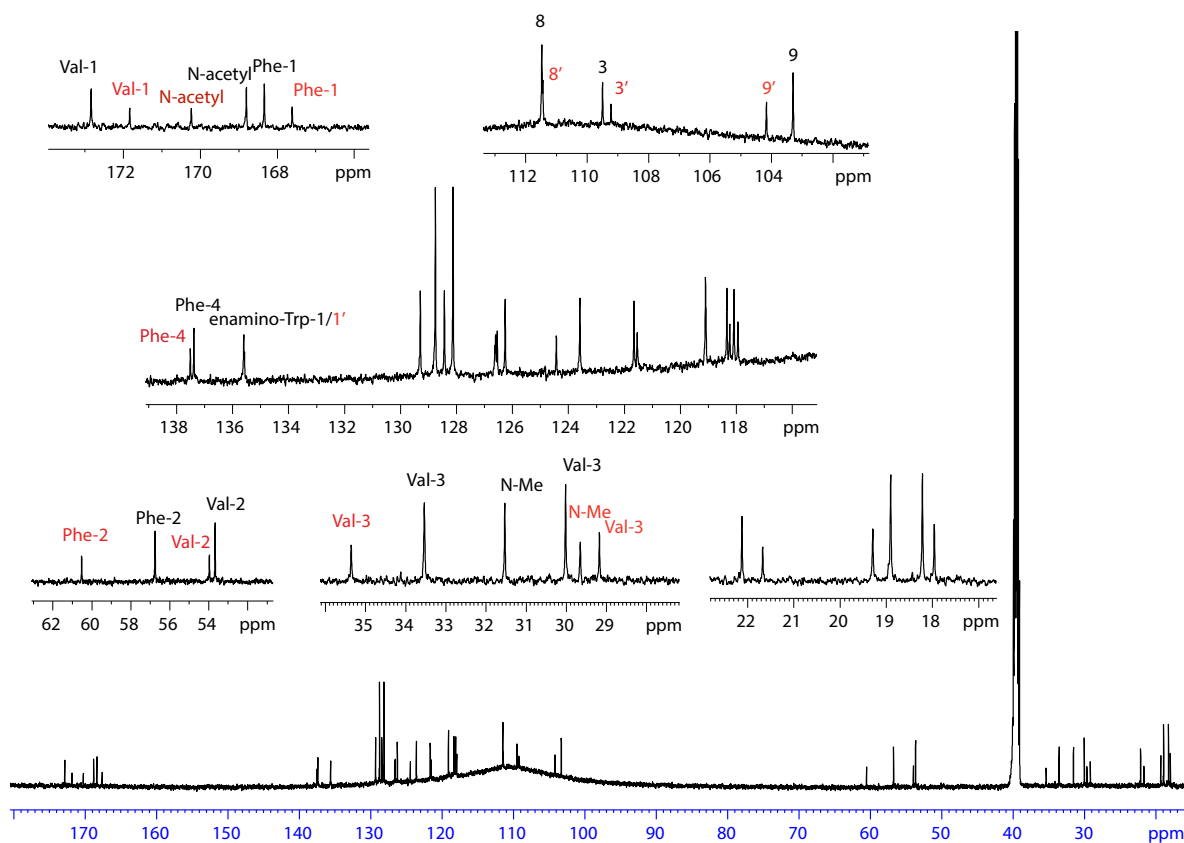

**Figure S13.**  $^{13}\text{C}$  NMR (150 MHz,  $\text{DMSO-}d_6$ ) spectrum of aspergillamide F (**8a**, labelled in black; **8b**, labelled in red).

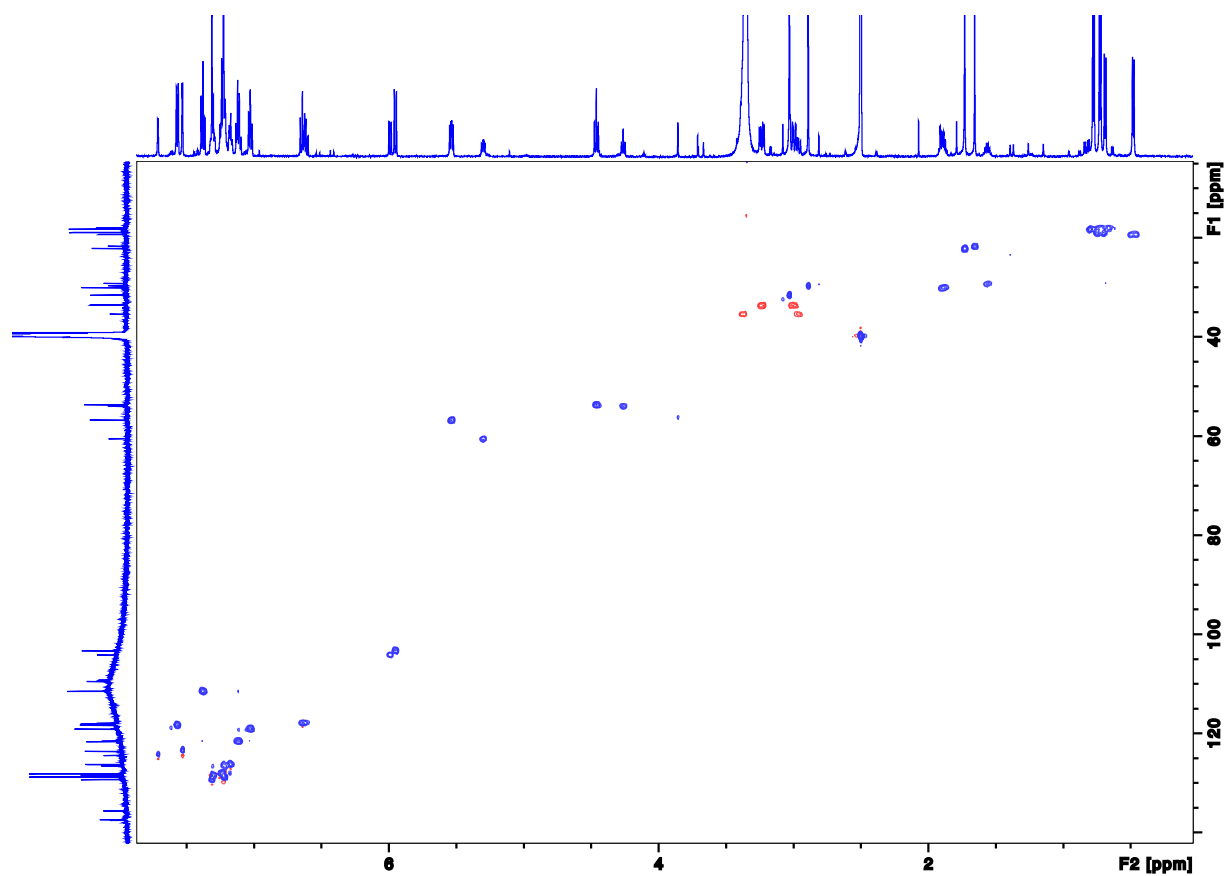

**Figure S14.** HSQC NMR (600 MHz, DMSO- $d_6$ ) spectrum of aspergillamide F (**8**).

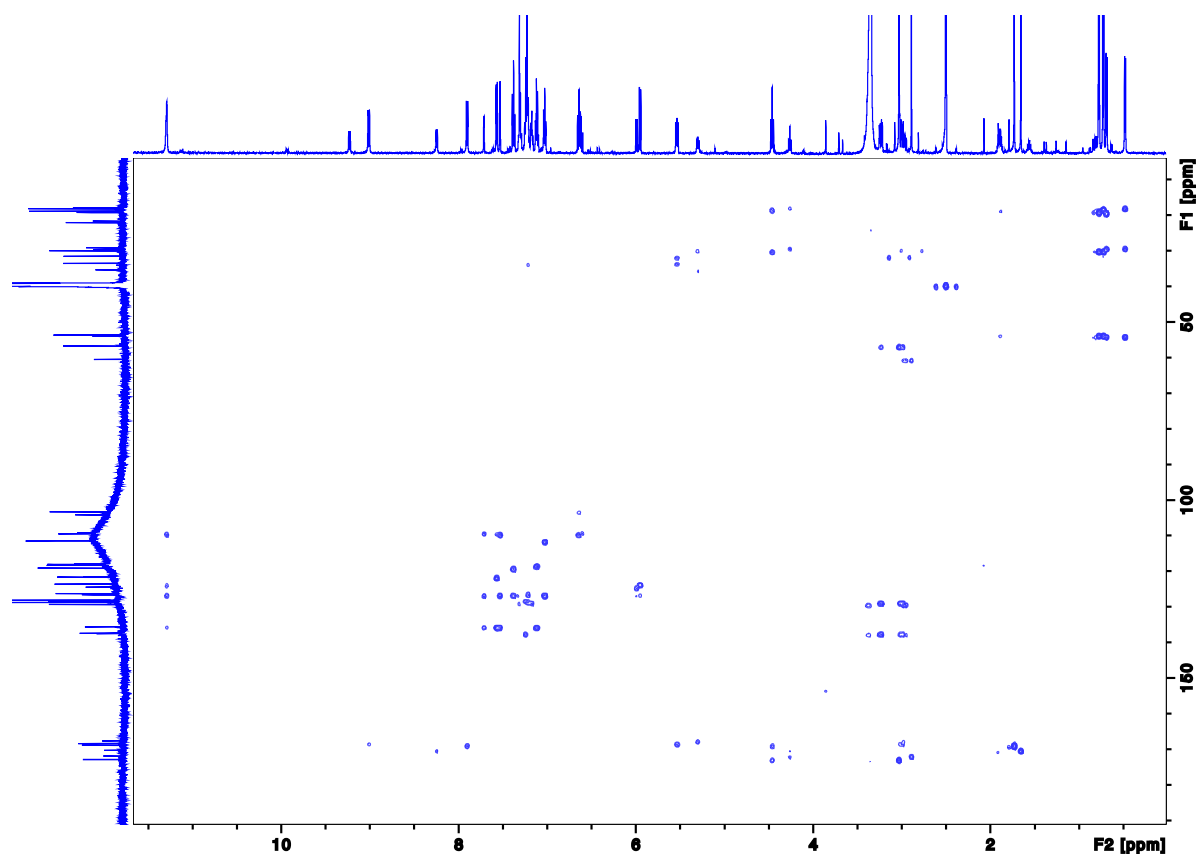

**Figure S15.** HMBC NMR (600 MHz, DMSO- $d_6$ ) spectrum of aspergillamide F (**8**).

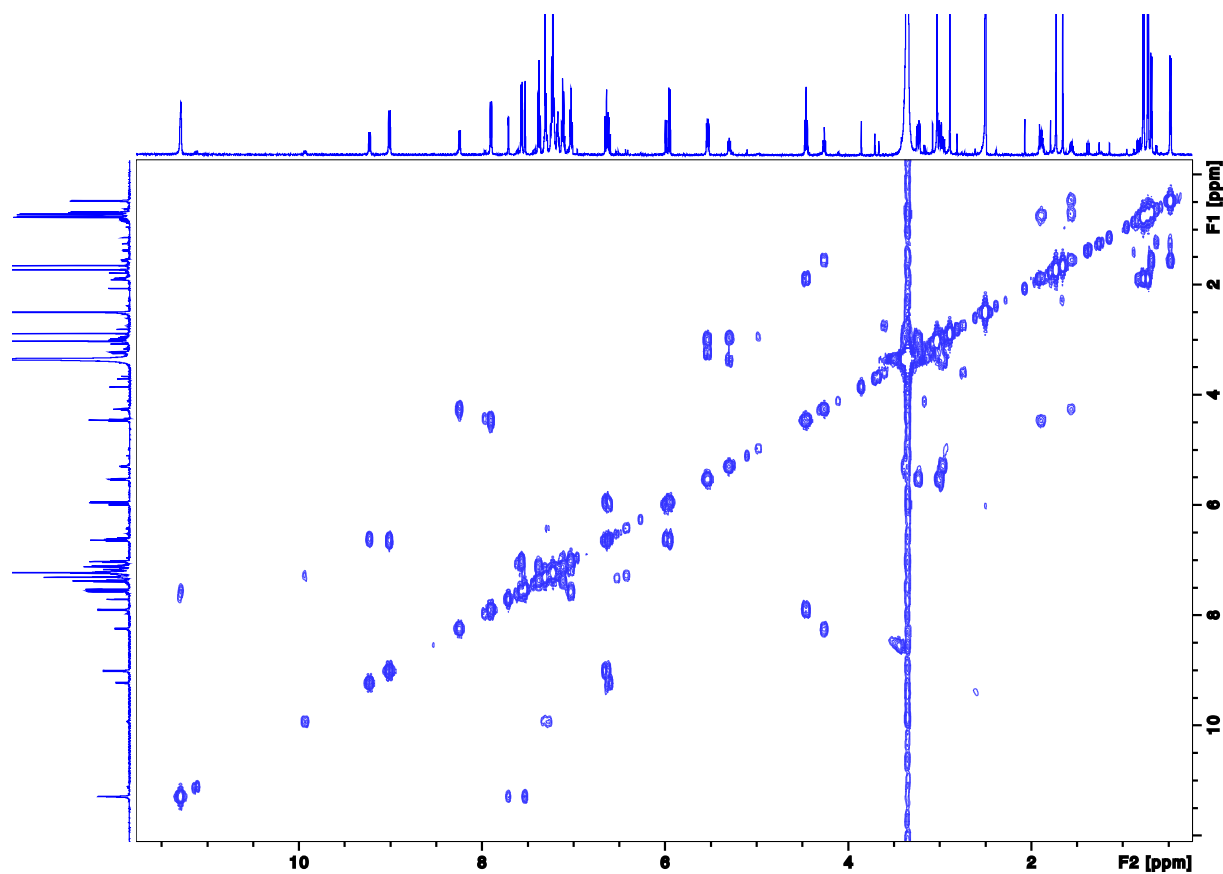

**Figure S16.** COSY NMR (600 MHz, DMSO-*d*<sub>6</sub>) spectrum of aspergillamide F (8).

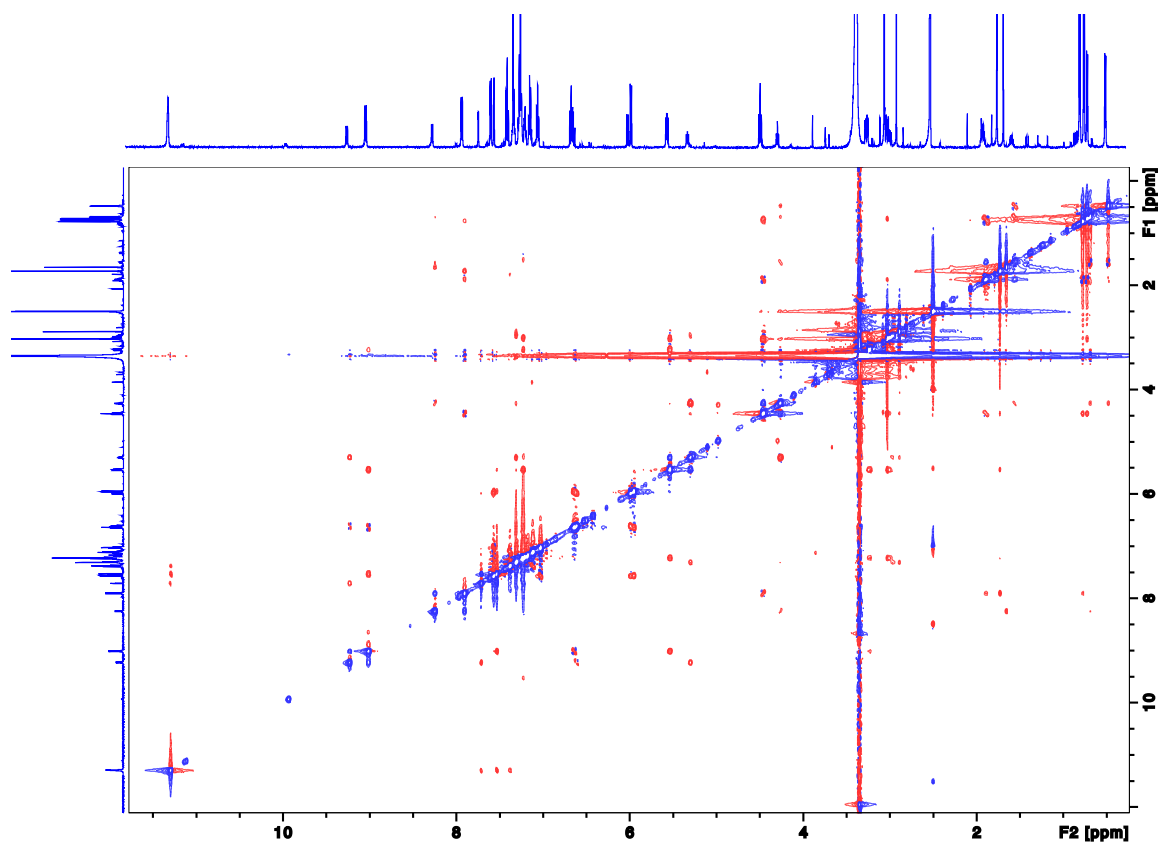

**Figure S17.** HMBC NMR (600 MHz, DMSO-*d*<sub>6</sub>) spectrum of aspergillamide F (8).

## Mass Spectrum Molecular Formula Report

### Analysis Info

Analysis Name D:\Data\Taizong\CMB\_MRF324\_com1c\_2.d  
 Method tune-med\_AP.m  
 Sample Name CMB\_MRF324\_com1c\_2  
 Comment

Acquisition Date 1/16/2020 2:51:06 PM

Operator a.salim  
 Instrument / Ser# microTOF 213750.00  
 232

### Acquisition Parameter

|             |            |                      |          |                  |           |
|-------------|------------|----------------------|----------|------------------|-----------|
| Source Type | ESI        | Ion Polarity         | Positive | Set Nebulizer    | 0.8 Bar   |
| Focus       | Not active |                      |          | Set Dry Heater   | 180 °C    |
| Scan Begin  | 100 m/z    | Set Capillary        | 4500 V   | Set Dry Gas      | 5.0 l/min |
| Scan End    | 1000 m/z   | Set End Plate Offset | -500 V   | Set Divert Valve | Source    |

### Generate Molecular Formula Parameter

|                  |                        |         |
|------------------|------------------------|---------|
| Formula, min.    |                        |         |
| Formula, max.    |                        |         |
| Measured m/z     | Tolerance              | Charge  |
| Check Valence    | Minimum                | Maximum |
| Nitrogen Rule    | Electron Configuration |         |
| Filter H/C Ratio | Minimum                | Maximum |
| Estimate Carbon  |                        |         |

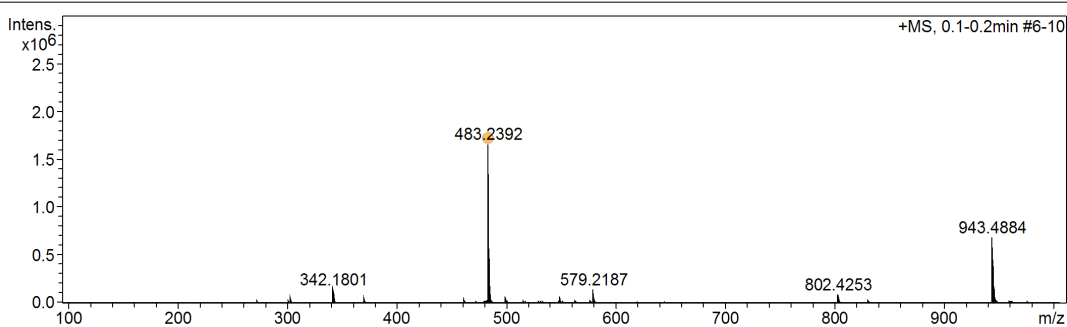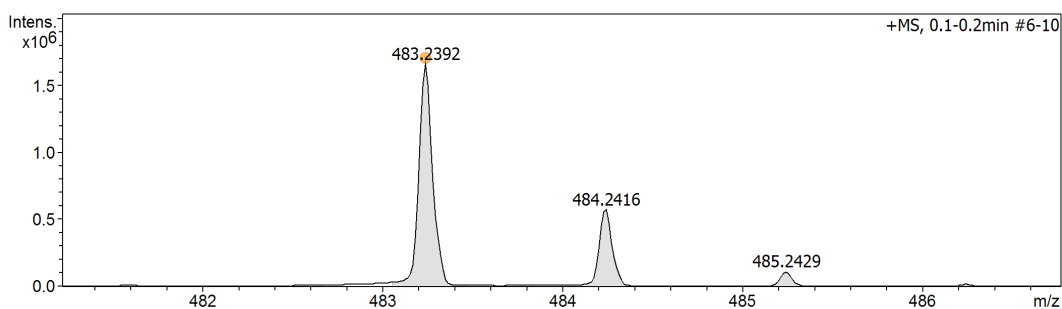

| Meas. m/z | # | Ion Formula  | m/z      | err [ppm] | mSigma | # Sigma | Score  | rdb  | e <sup>-</sup> Conf | N-Rule |
|-----------|---|--------------|----------|-----------|--------|---------|--------|------|---------------------|--------|
| 483.2392  | 1 | C32H32N2NaO  | 483.2407 | 3.2       | 6.7    | 1       | 100.00 | 17.5 | even                | ok     |
|           | 2 | C27H32N4NaO3 | 483.2367 | 5.2       | 17.4   | 2       | 39.13  | 13.5 | even                | ok     |
|           | 3 | C26H36NaO7   | 483.2353 | -7.9      | 28.6   | 3       | 7.98   | 8.5  | even                | ok     |

**Figure S18.** HRMS spectrum and measurement for aspergillamide F (**8**).

### 4.3 Asterriquinone SU5228 (9)

**Table S5.** 1D and 2D NMR (600 MHz, DMSO-*d*<sub>6</sub>) data for asterriquinone SU5228 (9)

| Pos.   | $\delta_{\text{H}}$ , mult, ( <i>J</i> in Hz) | $\delta_{\text{C}}$ | COSY      | ROESY        | HMBC             |
|--------|-----------------------------------------------|---------------------|-----------|--------------|------------------|
| 1      |                                               | n.d.                |           |              |                  |
| 2      |                                               | n.d.                |           |              |                  |
| 3      |                                               | n.d.                |           |              |                  |
| 4      |                                               | n.d.                |           |              |                  |
| 5      |                                               | n.d.                |           |              |                  |
| 6      |                                               | n.d.                |           |              |                  |
| 2'     |                                               | 137.9               |           |              |                  |
| 3'     |                                               | 101.4               |           |              |                  |
| 4'     | 7.16, d (7.9)                                 | 119.4               | 5'        |              | 6', 8'           |
| 5'     | 6.91, dd (7.9)                                | 118.4               | 4', 6'    |              | 7', 9'           |
| 6'     | 7.01, dd (7.9)                                | 120.1               | 5', 7'    |              | 4', 8'           |
| 7'     | 7.32, d (7.9)                                 | 110.6               | 6', 1'-NH | 1'-NH        | 5', 9'           |
| 8'     |                                               | 135.4               |           |              |                  |
| 9'     |                                               | 128.0               |           |              |                  |
| 10'    | 3.33 <sup>A</sup>                             | 26.4                | 11'       |              | 2', 3', 11', 12' |
| 11'    | 5.3, t (6.8)                                  | 121.2               | 10'       | 13', 14'     | 10', 12', 13'    |
| 12'    |                                               | 132.1               |           |              |                  |
| 13'    | 1.64, s                                       | 17.6                |           | 11'          | 11', 12', 14'    |
| 14'    | 1.67, s                                       | 25.5                |           | 11'          | 11', 12', 13'    |
| 2''    | 7.50, d (2.5)                                 | 127.2               |           | 1''-NH       | 3, 8'', 9''      |
| 3''    |                                               | 104.6               |           |              |                  |
| 4''    | 7.42, d (7.9)                                 | 121.5               | 5''       |              | 6'', 8''         |
| 5''    | 6.99, dd (7.9, 7.9)                           | 118.5               | 4'', 6''  |              | 7'', 9''         |
| 6''    | 7.10, dd (7.9, 7.9)                           | 120.8               | 5'', 7''  |              | 4'', 8''         |
| 7''    | 7.41, d (7.9)                                 | 111.4               | 6''       | 1''-NH       | 5'', 9''         |
| 8''    |                                               | 135.7               |           |              |                  |
| 9''    |                                               | 126.5               |           |              |                  |
| 1'-NH  | 10.98, s                                      |                     |           | 7', 10', 11' | 3', 9'           |
| 1''-NH | 11.36, s                                      |                     |           | 2'', 7''     |                  |

<sup>A</sup> Resonance obscured by H<sub>2</sub>O but detected by HSQC; n.d. Not detected.

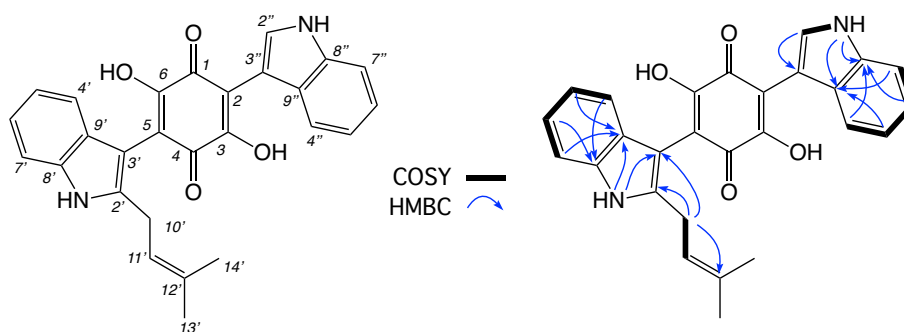

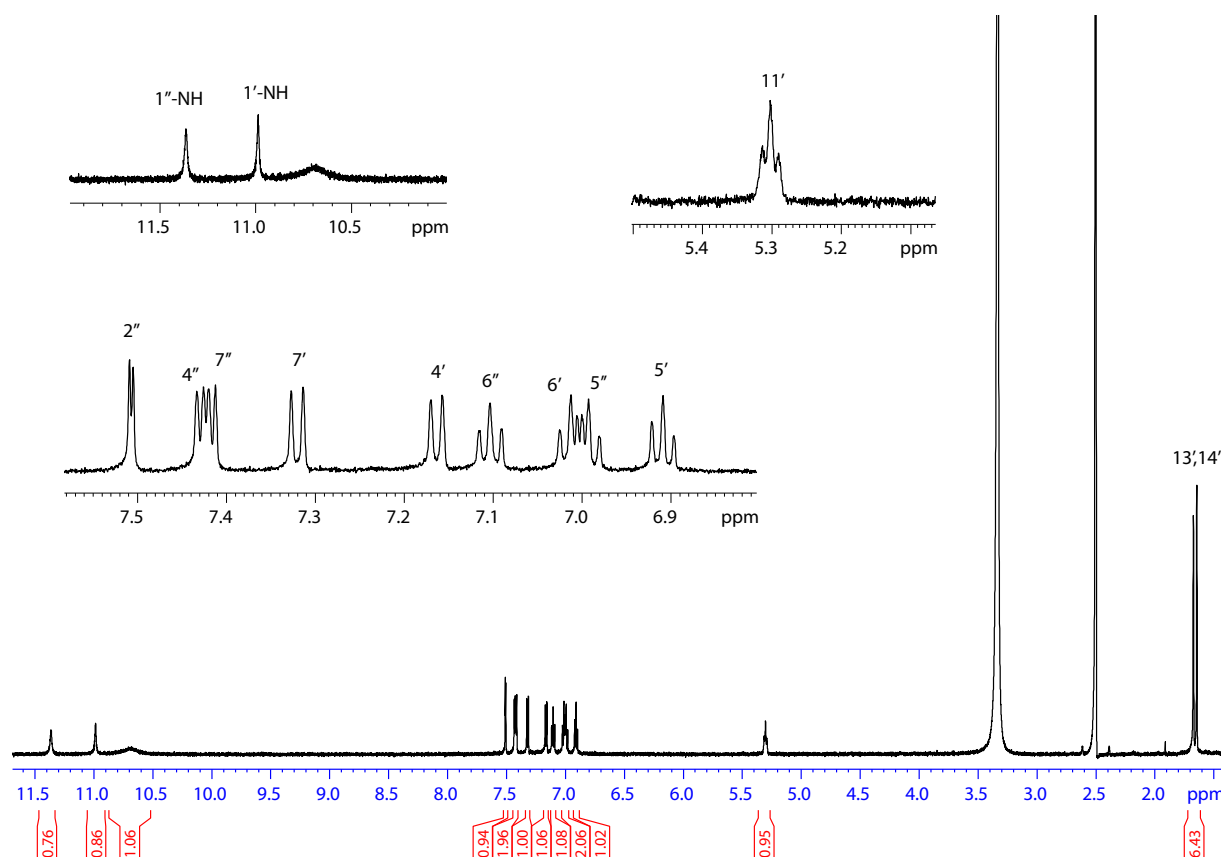

**Figure S19.**  $^1\text{H}$  NMR (600 MHz,  $\text{DMSO}-d_6$ ) spectrum of asterriquinone SU5228 (**9**).

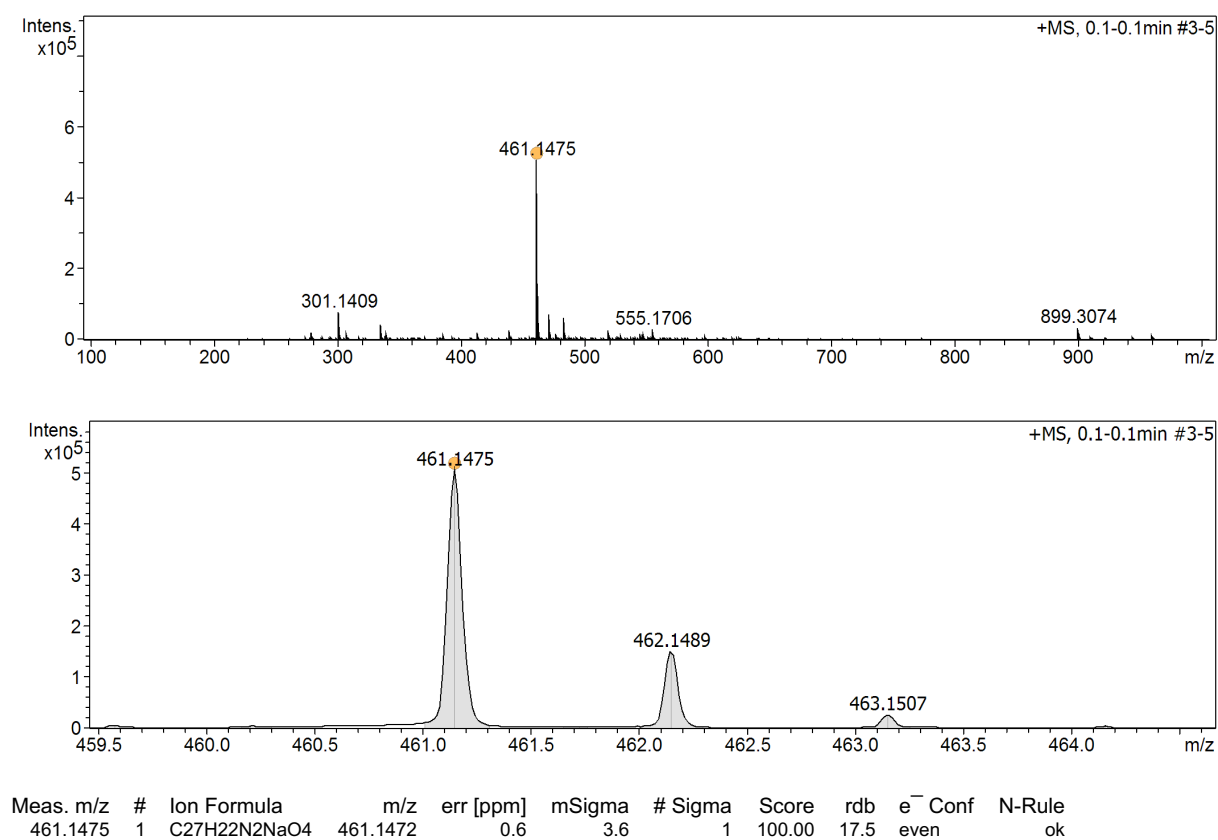

**Figure S20.** HRMS spectrum and measurement for asterriquinone SU5228 (**9**).

## 4.4 Asterriquinone CT5 (10)

**Table S6.** 1D and 2D NMR (600 MHz) data for asterriquinone CT5 (**10**)

| Pos.   | $\delta_{\text{H}}$ , mult, ( $J$ in Hz)* | $\delta_{\text{C}}$ * | COSY*    | ROESY*       | HMBC*                | $\delta_{\text{H}}$ , mult, ( $J$ in Hz)** | $\delta_{\text{C}}$ , ** |
|--------|-------------------------------------------|-----------------------|----------|--------------|----------------------|--------------------------------------------|--------------------------|
| 1      |                                           | n.d.                  |          |              |                      |                                            |                          |
| 2      |                                           | n.d.                  |          |              |                      |                                            |                          |
| 3      |                                           | n.d.                  |          |              |                      |                                            |                          |
| 4      |                                           | n.d.                  |          |              |                      |                                            |                          |
| 5      |                                           | n.d.                  |          |              |                      |                                            |                          |
| 6      |                                           | n.d.                  |          |              |                      |                                            |                          |
| 2'     |                                           | 137.8                 |          |              |                      |                                            | 138.4                    |
| 3'     |                                           | 101.5                 |          |              |                      |                                            | 100.5                    |
| 4'     | 7.20, d (8.0) <sup>B</sup>                | 119.5                 | 5'       |              | 6', 8'               | 7.33, d (7.7)                              | 119.3                    |
| 5'     | 6.92, dd (8.0, 8.0)                       | 118.4                 | 4', 6'   |              | 7', 9'               | 7.12, dd (7.7, 7.7)                        | 120.1                    |
| 6'     | 7.02, dd (8.0, 8.0)                       | 120.1                 | 5', 7'   |              | 4', 8'               | 7.17, dd (7.7, 7.7)                        | 121.7                    |
| 7'     | 7.33, d (8.0)                             | 110.7                 | 6'       | 1'-NH        | 5', 9'               | 7.35, d (7.7)                              | 110.9                    |
| 8'     |                                           | 135.4                 |          |              |                      |                                            | 135.3                    |
| 9'     |                                           | 128.0                 |          |              |                      |                                            | 127.9                    |
| 10'    | 3.34 <sup>A</sup>                         | 26.4                  | 11'      | 1'-NH        | 2', 3', 11', 12'     | 3.47, dd (13.3, 7.2)                       | 26.9                     |
| 11'    | 5.30, t (7.3)                             | 121.2                 | 10'      | 1'-NH        | 10', 13', 14'        | 5.41, br. s                                | 119.7                    |
| 12'    |                                           | 132.2                 |          |              |                      |                                            | 135.9                    |
| 13'    | 1.65, s <sup>C</sup>                      | 17.6                  |          |              | 11', 12', 14'        | 1.77, br. s                                | 18.1                     |
| 14'    | 1.68, s <sup>D</sup>                      | 25.6                  |          |              | 11', 12', 13'        | 1.82, br. s                                | 25.9                     |
| 2''    |                                           | 137.8                 |          |              |                      |                                            |                          |
| 3''    |                                           | 101.5                 |          |              |                      |                                            |                          |
| 4''    | 7.13, d (8.0) <sup>B</sup>                | 119.2                 | 5''      |              | 6'', 8''             |                                            |                          |
| 5''    | 6.92, dd (8.0, 8.0)                       | 118.4                 | 4'', 6'' |              | 7'', 9''             |                                            |                          |
| 6''    | 7.02, dd (8.0, 8.0)                       | 120.1                 | 5'', 7'' |              | 4'', 8''             |                                            |                          |
| 7''    | 7.33, d (8.0)                             | 110.7                 | 6''      | 1''-NH       | 5'', 9''             |                                            |                          |
| 8''    |                                           | 135.4                 |          |              |                      |                                            |                          |
| 9''    |                                           | 128.0                 |          |              |                      |                                            |                          |
| 10''   | 3.34 <sup>A</sup>                         | 26.4                  | 11''     | 1''-NH       | 2'', 3'', 11'', 12'' |                                            |                          |
| 11''   | 5.30, t (7.3)                             | 121.2                 | 10''     | 1''-NH       | 10'', 13'', 14''     |                                            |                          |
| 12''   |                                           | 132.2                 |          |              |                      |                                            |                          |
| 13''   | 1.63, s <sup>C</sup>                      | 17.6                  |          |              | 11'', 12'', 14''     |                                            |                          |
| 14''   | 1.67, s <sup>D</sup>                      | 25.6                  |          |              | 11'', 12'', 13''     |                                            |                          |
| 1'-NH  | 11.02, s                                  |                       |          | 7', 10', 11' | 2', 3', 8', 9'       |                                            |                          |
| 1''-NH | 11.02, s                                  |                       |          | 7'', 10'',   | 2'', 3'', 8'', 9''   |                                            |                          |

\* Data acquired in DMSO- $d_6$ ; \*\* Data acquired in CDCl<sub>3</sub>; <sup>A</sup>Resonance obscured by H<sub>2</sub>O but detected by HSQC; <sup>B-D</sup> Assignments with same letter are interchangeable;

Note: The asymmetry of the NMR data of **10** in DMSO- $d_6$  and methanol- $d_4$  was proposed due to formation of atropisomers. The atropisomer issue was solved when acquiring NMR data of **10** in nonpolar CDCl<sub>3</sub>.

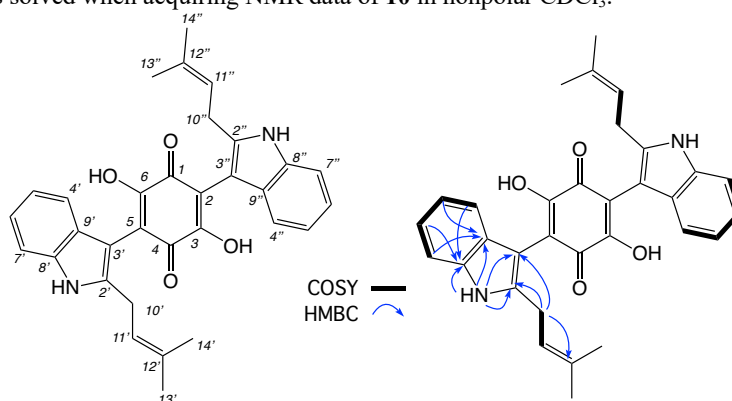

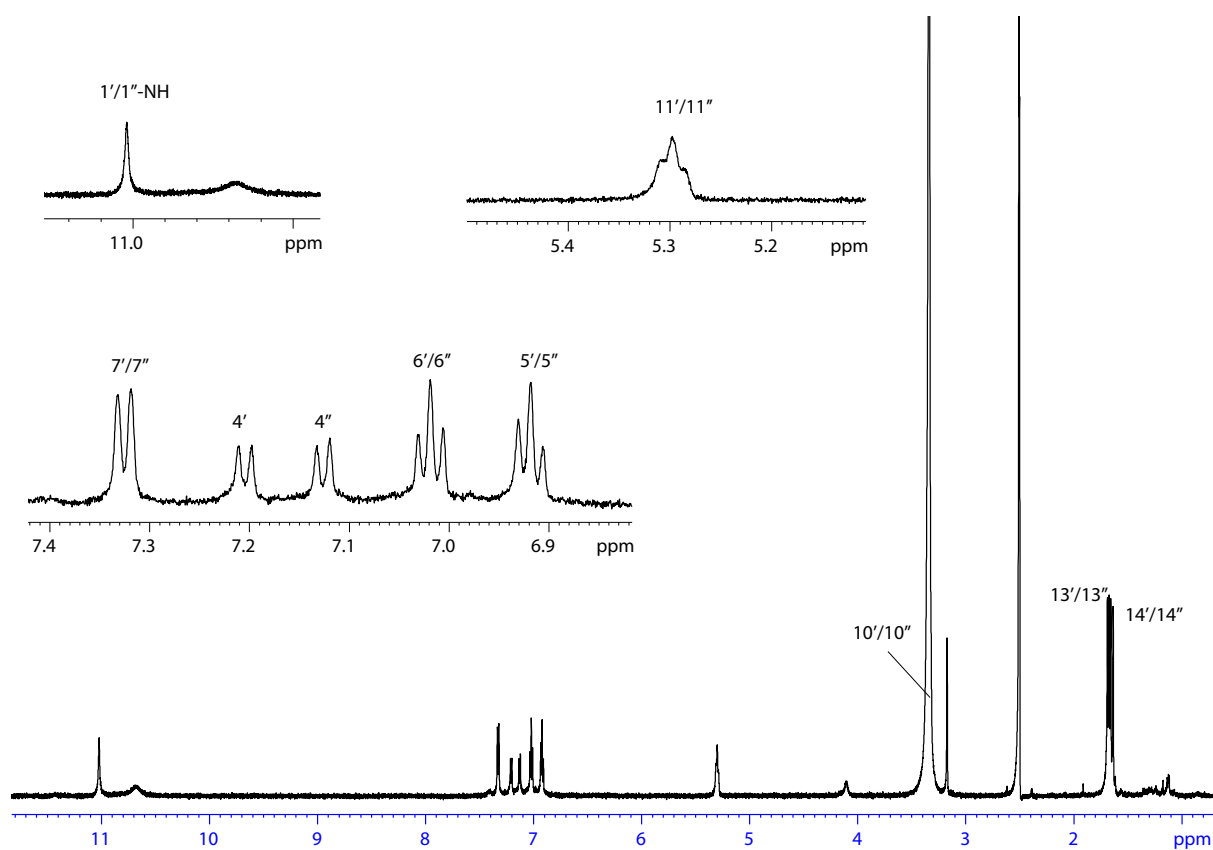

**Figure S21.**  $^1\text{H}$  NMR (600 MHz,  $\text{DMSO}-d_6$ ) spectrum of asterriquinone CT5 (**10**).

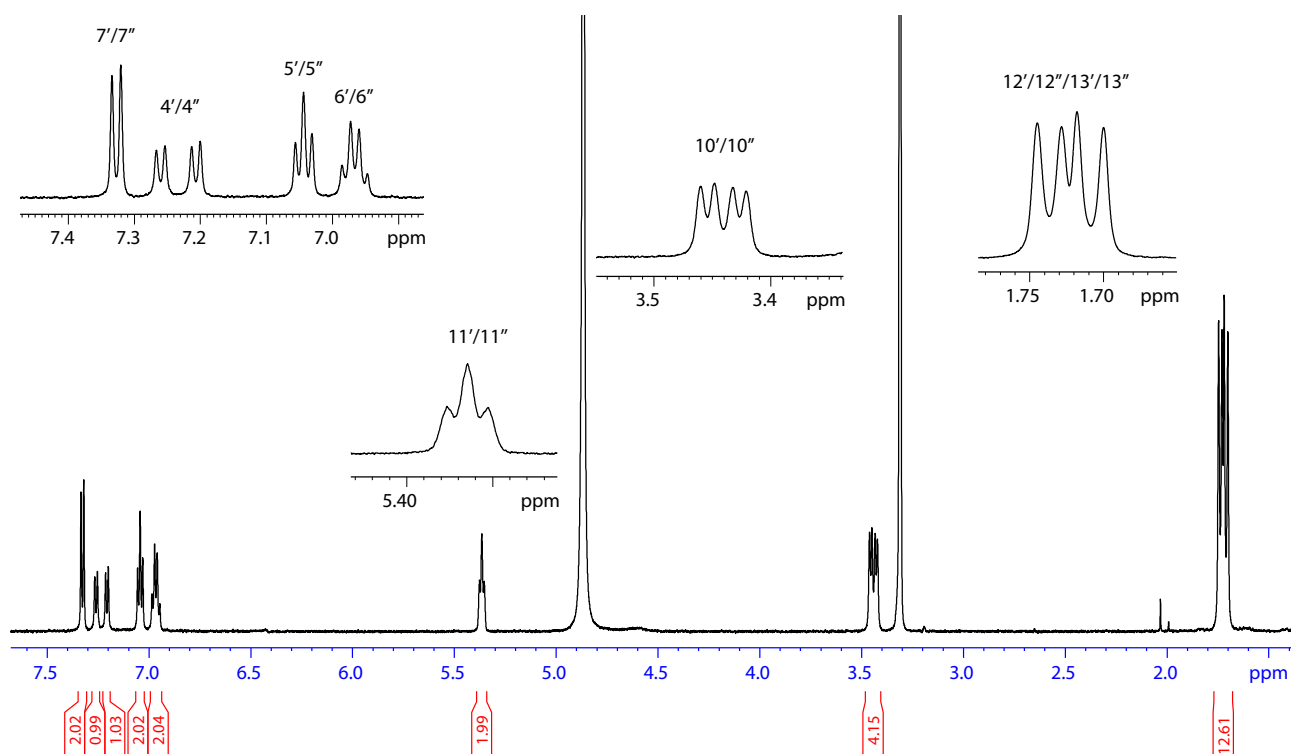

**Figure S22.**  $^1\text{H}$  NMR (600 MHz,  $\text{methanol}-d_4$ ) spectrum of asterriquinone CT5 (**10**).

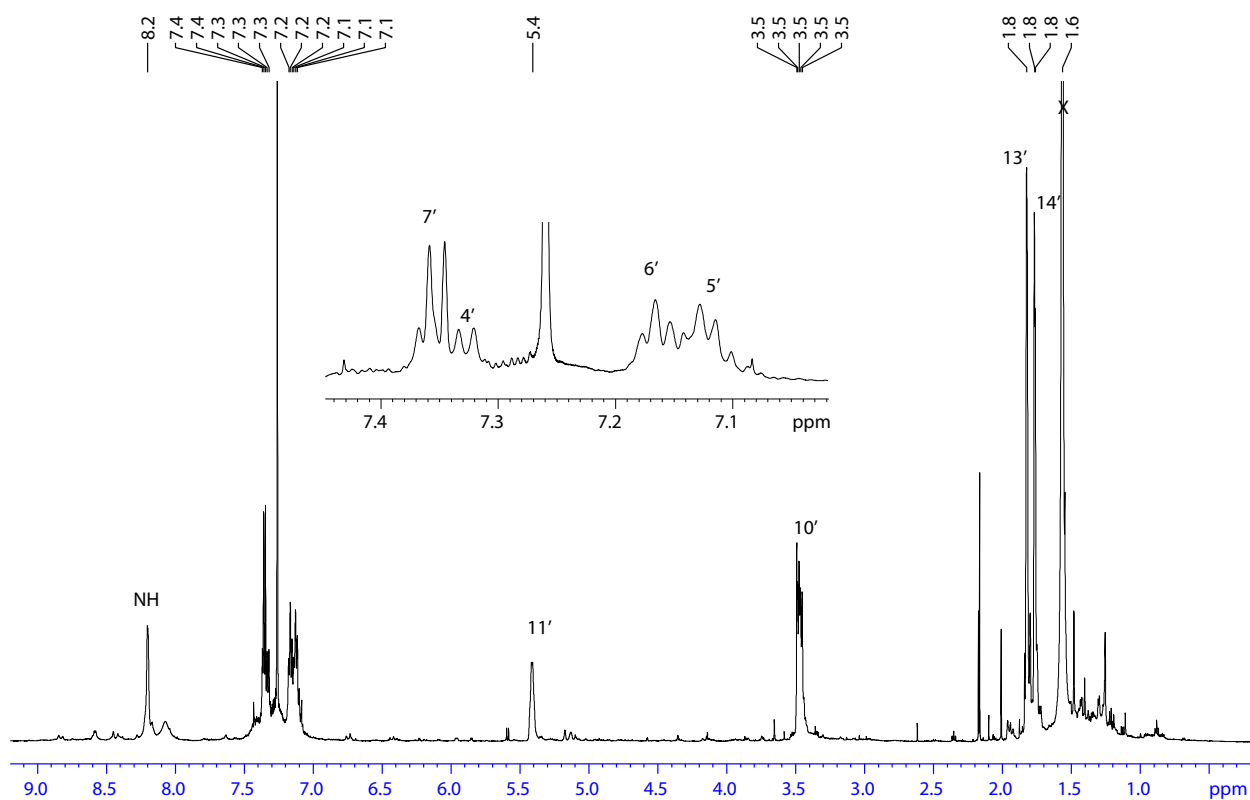

**Figure S23.** <sup>1</sup>H NMR (600 MHz, CDCl<sub>3</sub>) spectrum of asterriquinone CT5 (**10**).

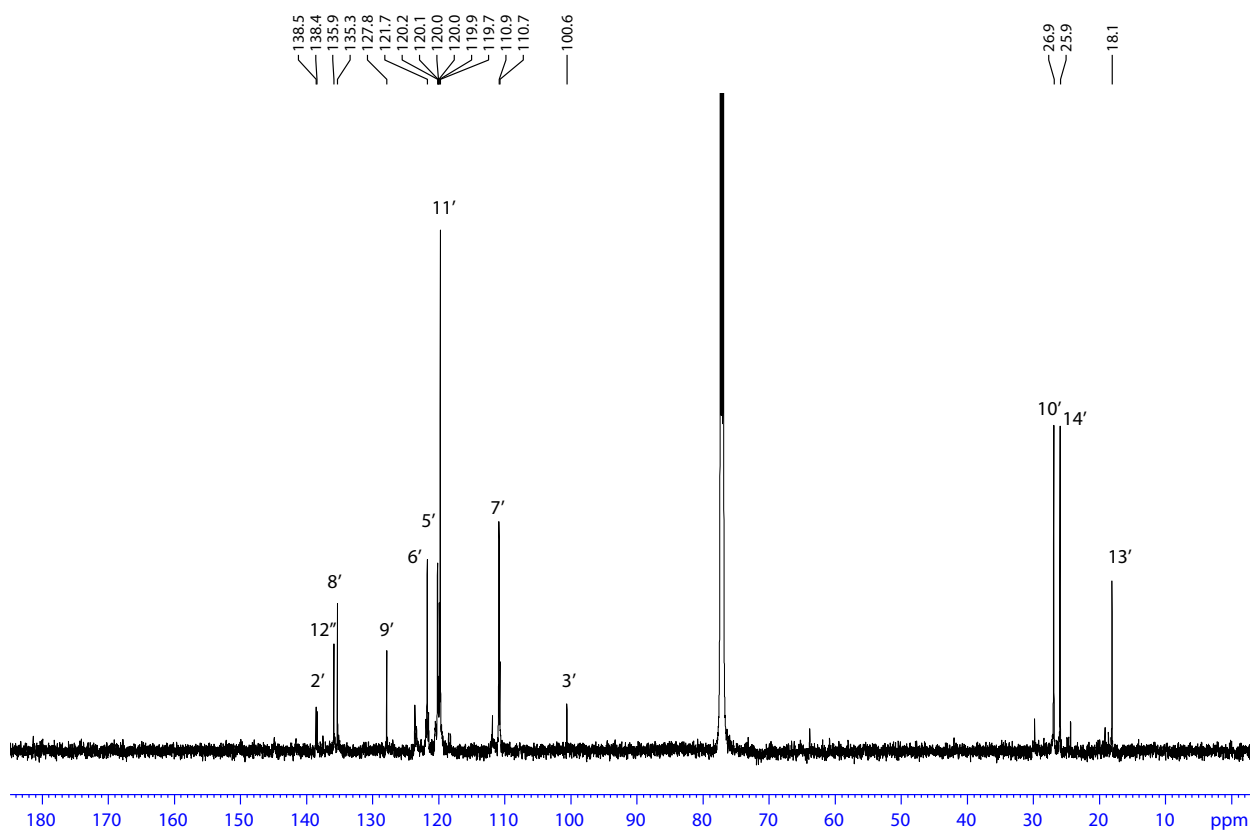

**Figure S24.** <sup>13</sup>C NMR (150 MHz, CDCl<sub>3</sub>) spectrum of asterriquinone CT5 (**10**).

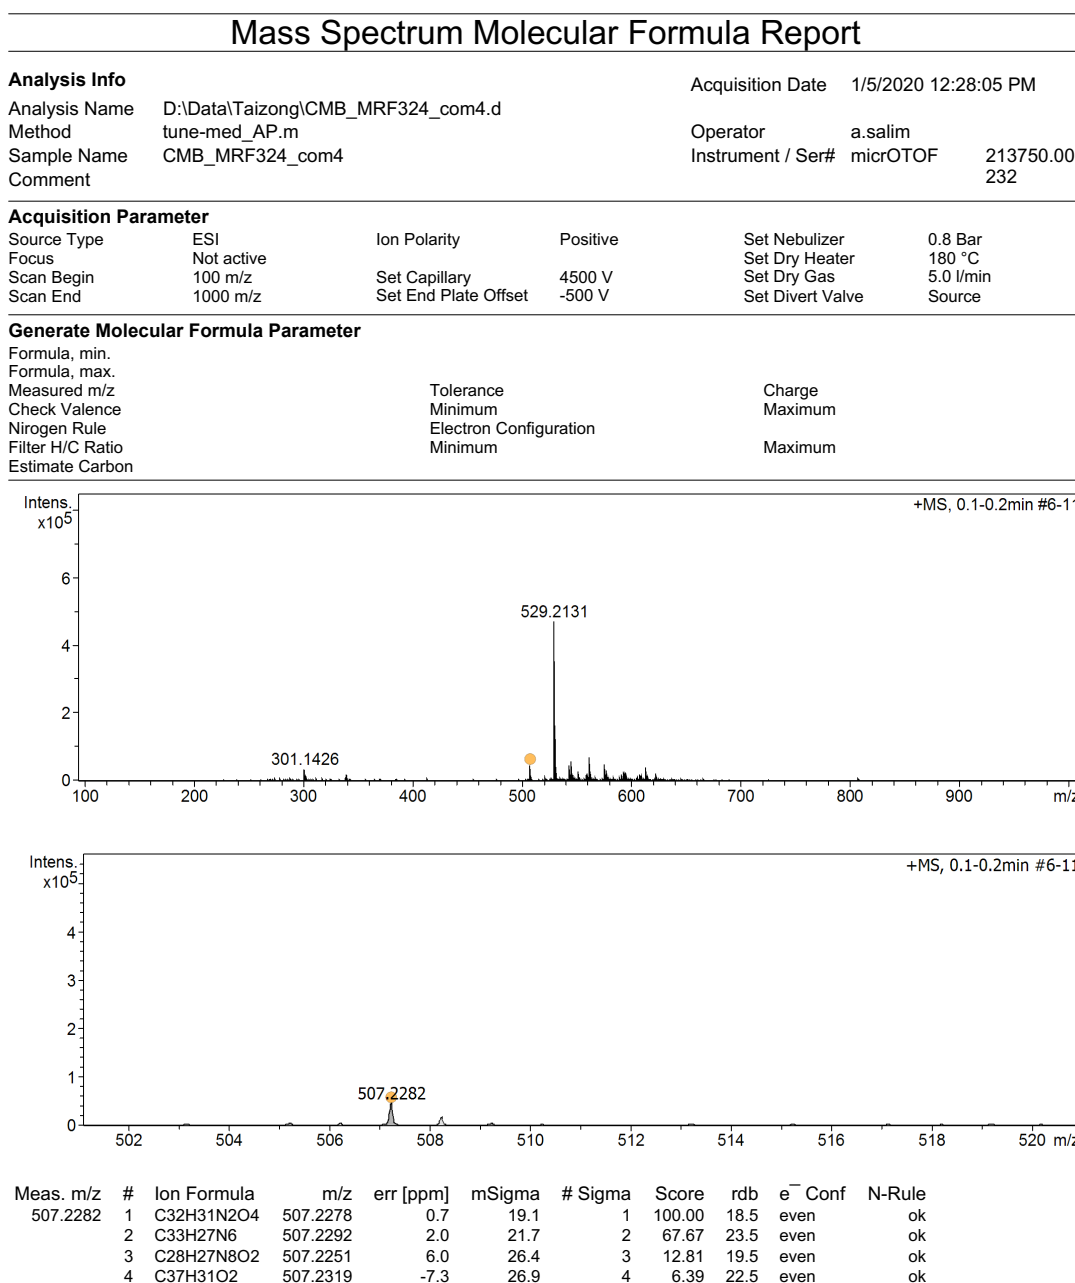

**Figure S25.** HRMS spectrum and measurement for asterriquinone CT5 (**10**).

## 4.5 Aflaquinolone H (11)

**Table S7.** 1D and 2D NMR (600 MHz, CDCl<sub>3</sub>) data for aflaquinolone H (11)

| Pos.   | $\delta_{\text{H}}$ , mult, ( <i>J</i> in Hz) | $\delta_{\text{C}}$ | COSY                           | ROESY              | HMBC               |
|--------|-----------------------------------------------|---------------------|--------------------------------|--------------------|--------------------|
| 2      |                                               | 165.8               |                                |                    |                    |
| 3      | 3.70, br d (1.5)                              | 84.3                |                                | 3-OMe, 4-OH, 12/16 | 2, 4, 5, 11, 3-OMe |
| 3-OMe  | 3.61, s                                       | 59.1                |                                | 3, 4-OH            | 3                  |
| 4      |                                               | 78.9                |                                |                    |                    |
| 5      |                                               | 111.1               |                                |                    |                    |
| 6      |                                               | 155.2               |                                |                    |                    |
| 7      |                                               | 122.4               |                                |                    |                    |
| 8      | 7.40, d (8.2)                                 | 127.3               | 9                              |                    | 6, 10, 11, 17      |
| 9      | 6.36, d (8.2)                                 | 107.0               | 8                              |                    | 5, 7               |
| 10     |                                               | 134.4               |                                |                    |                    |
| 11     |                                               | 129.2               |                                |                    |                    |
| 12     | 7.18, d (8.8)                                 | 128.0               | 13                             | 3                  | 4, 14, 16          |
| 13     | 6.82, d (8.8)                                 | 114.5               | 12                             |                    | 11, 14, 15         |
| 14     |                                               | 160.5               |                                |                    |                    |
| 14-OMe | 3.76, s                                       | 55.4                |                                |                    | 14                 |
| 15     | 6.82, d (8.8)                                 | 114.5               | 16                             |                    |                    |
| 16     | 7.18, d (8.8)                                 | 128.0               | 15                             | 3                  |                    |
| 17     | 6.79, d (16.6)                                | 122.7               | 18                             |                    | 6, 8, 19           |
| 18     | 6.28, d (16.6)                                | 135.9               | 17                             |                    | 7, 20, 22, 24      |
| 19     |                                               | 37.6                |                                |                    |                    |
| 20     | a. 2.11, m<br>b. 1.47, dd (13.4, 13.4)        | 47.7                | 20b, 21<br>20a, 21             |                    | 18, 19, 22, 25, 26 |
| 21     | 2.54, m                                       | 41.5                | 20a, 20b, 26                   |                    | 20, 22, 26         |
| 22     |                                               | 214.0               |                                |                    |                    |
| 23     | a. 2.49, dd (14.2, 5.7)<br>b. 2.24, m         | 38.7                | 23b, 24a, 24b<br>23a, 24a, 24b |                    | 19, 22, 24         |
| 24     | a. 2.15, m<br>b. 1.73, td (13.4, 4.4)         | 38.5                | 23a, 23b, 24b<br>23a, 24b, 24a |                    | 18, 25             |
| 25     | 1.10, s                                       | 30.6                |                                |                    | 18, 19, 20, 22     |
| 26     | 0.99, d (6.5)                                 | 14.6                | 21                             |                    | 20, 21, 22         |
| 1-NH   | 7.75, br s                                    |                     |                                |                    | 2, 3, 5, 9, 10     |
| 4-OH   | 4.58, s                                       |                     |                                | 3, 3-OMe           | 3, 4, 11           |
| 6-OH   | 9.14, s                                       |                     |                                |                    | 5, 6, 7            |

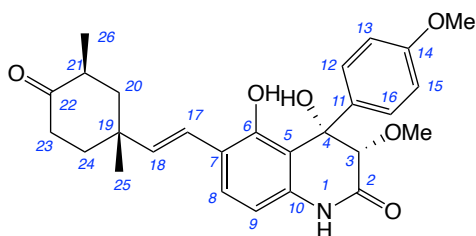

COSY —  
 HMBC —  
 ROESY —

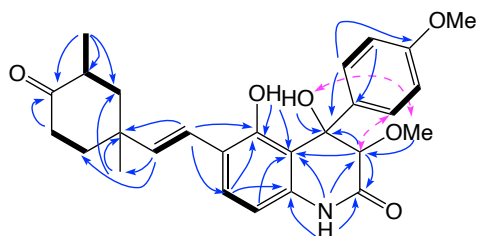

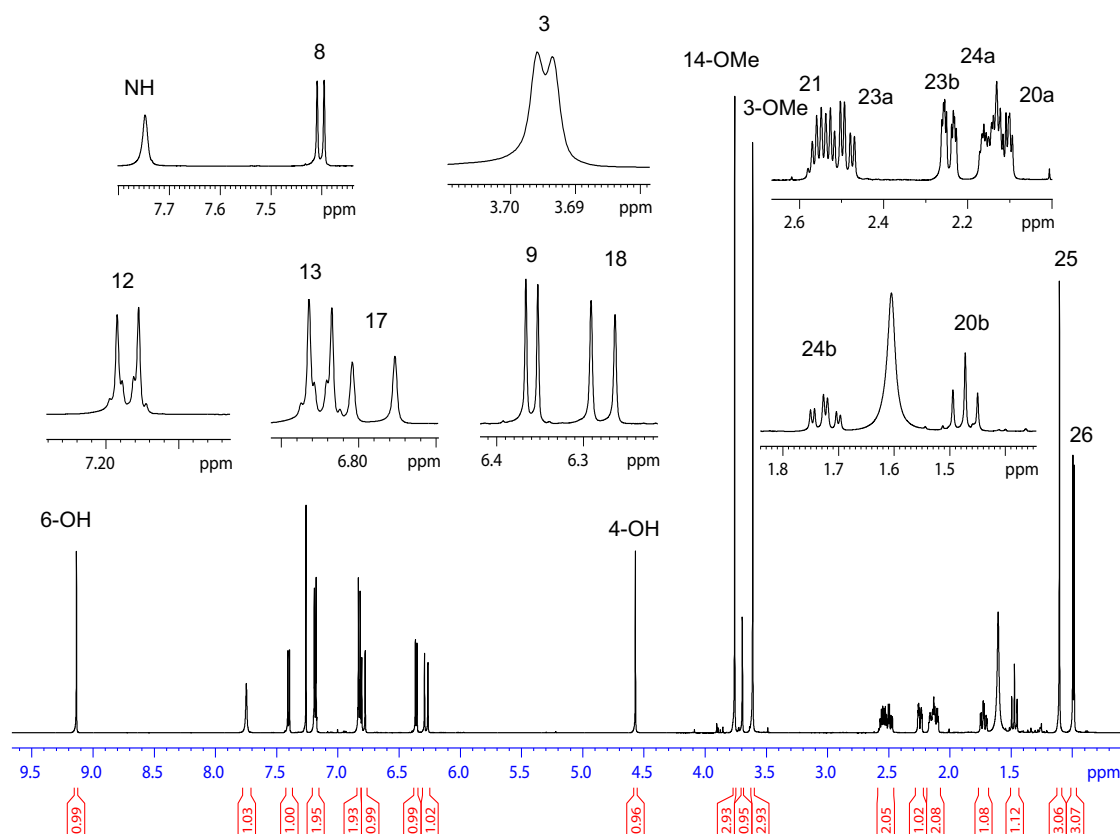

**Figure S26.**  $^1\text{H}$  NMR (600 MHz,  $\text{CDCl}_3$ ) spectrum for aflaquinolone H (**11**).

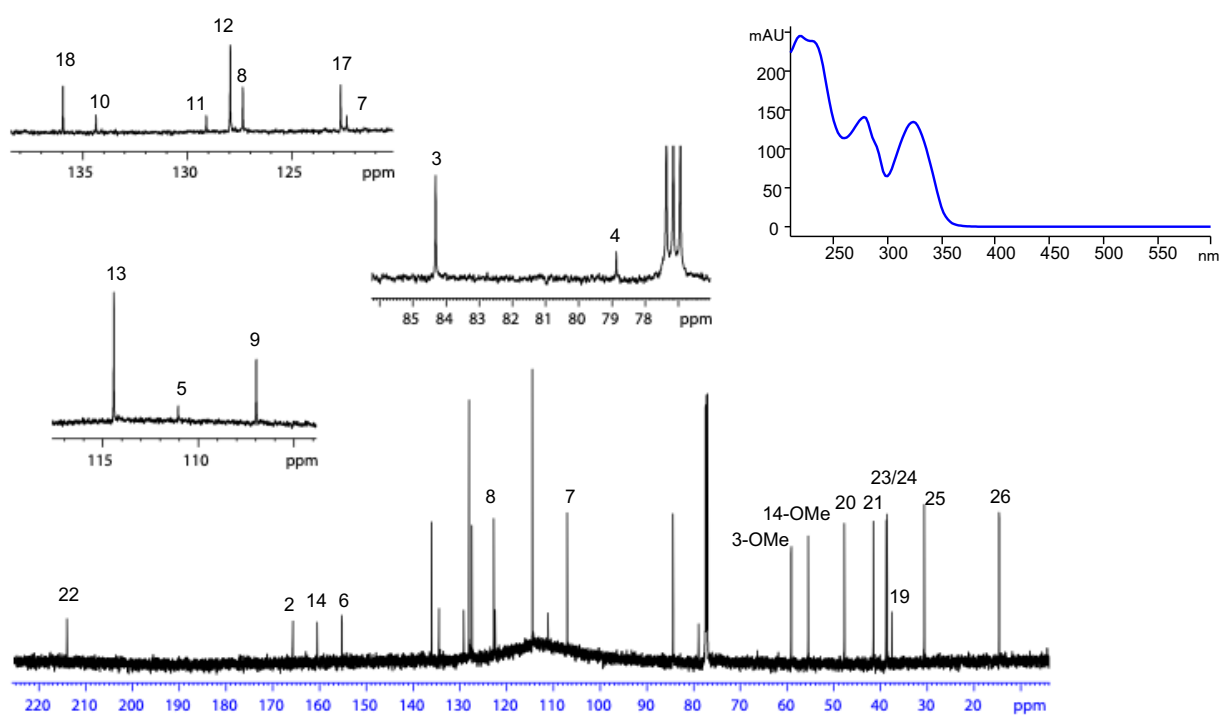

**Figure S27.**  $^{13}\text{C}$  NMR (150 MHz,  $\text{CDCl}_3$ ) and UV-vis (inset) spectra for aflaquinolone H (**11**).

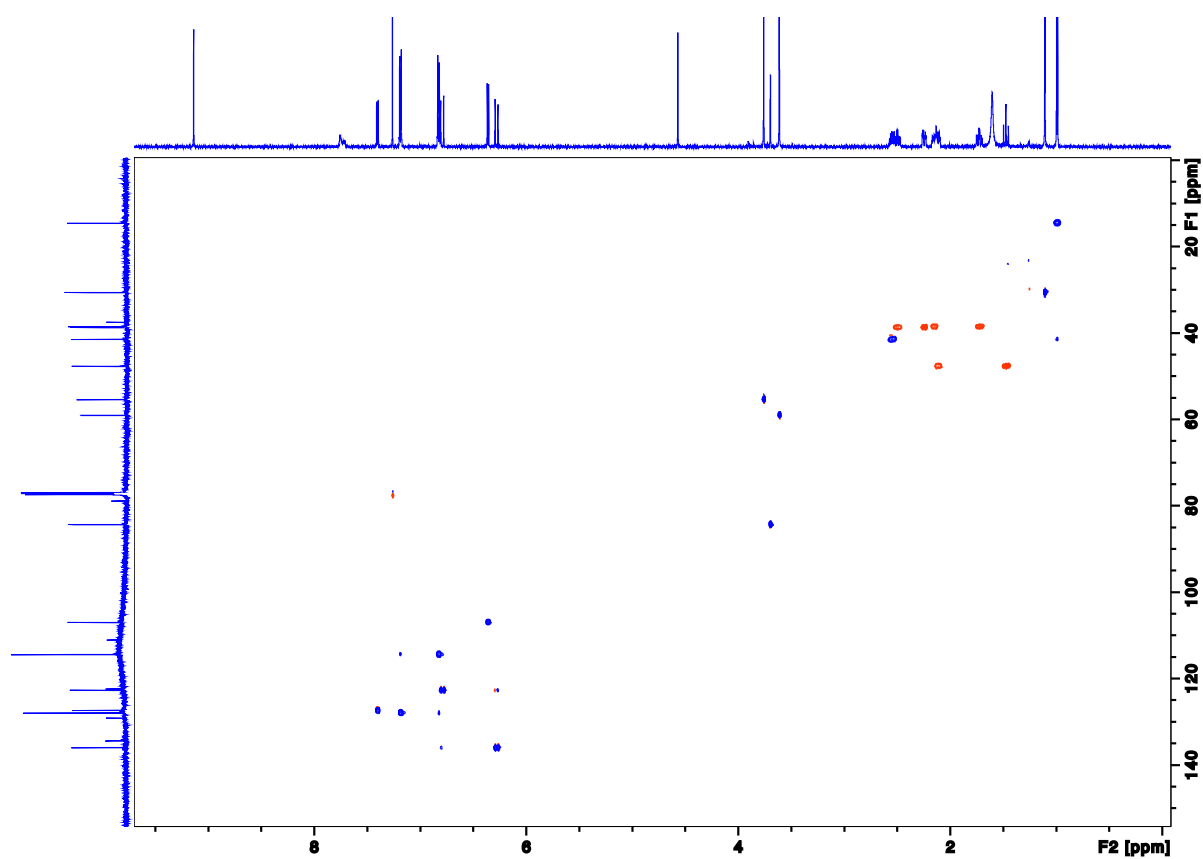

**Figure S28.** HSQC NMR ( $\text{CDCl}_3$ ) spectrum for aflaquinolone H (**11**).

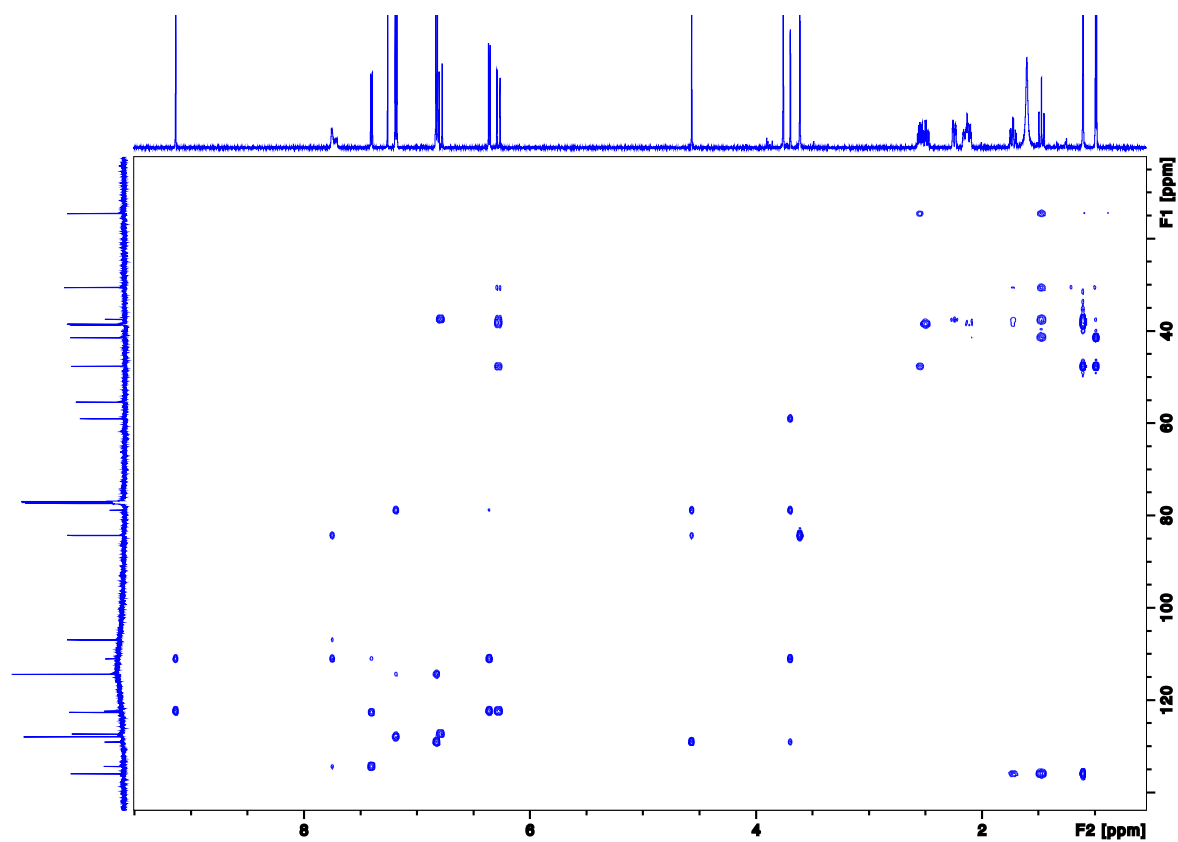

**Figure S29.** HMBC NMR ( $\text{CDCl}_3$ ) spectrum for aflaquinolone H (**11**).

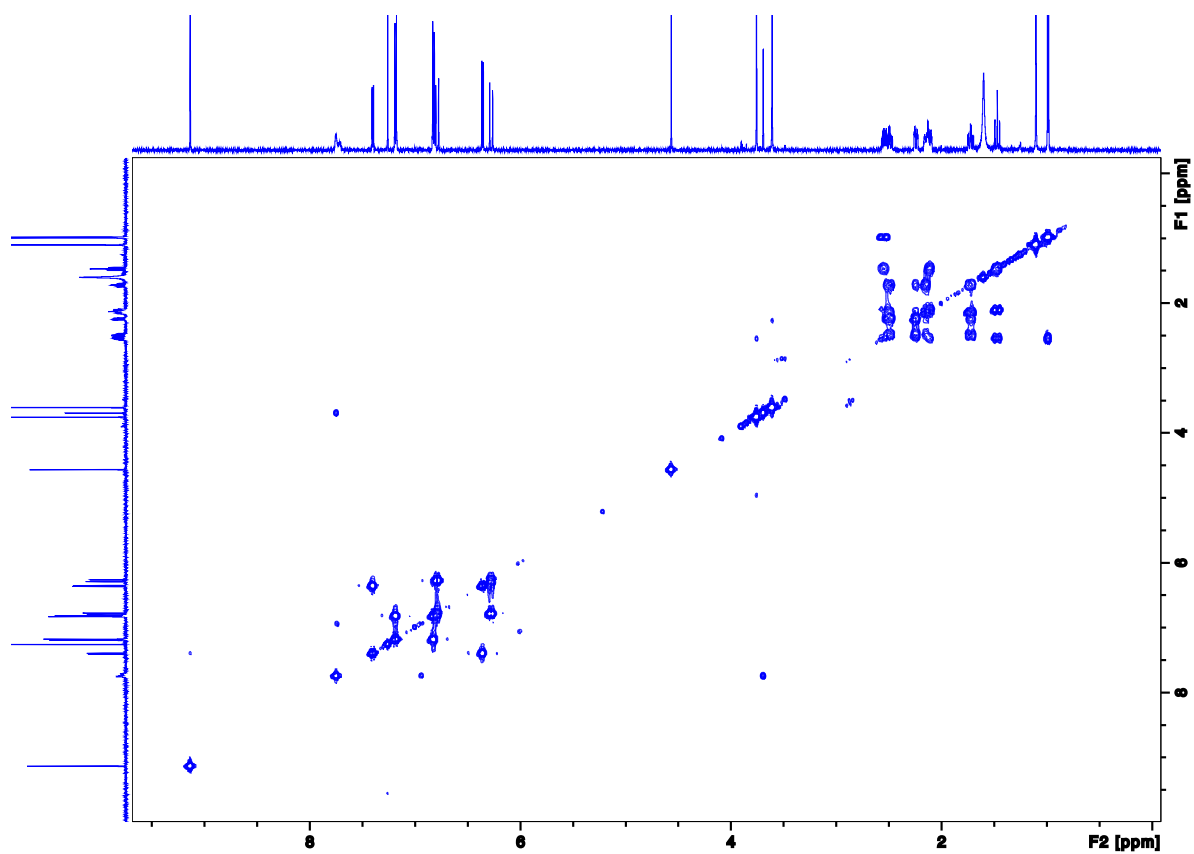

**Figure S30.** COSY NMR (CDCl<sub>3</sub>) spectrum for aflaquinolone H (**11**).

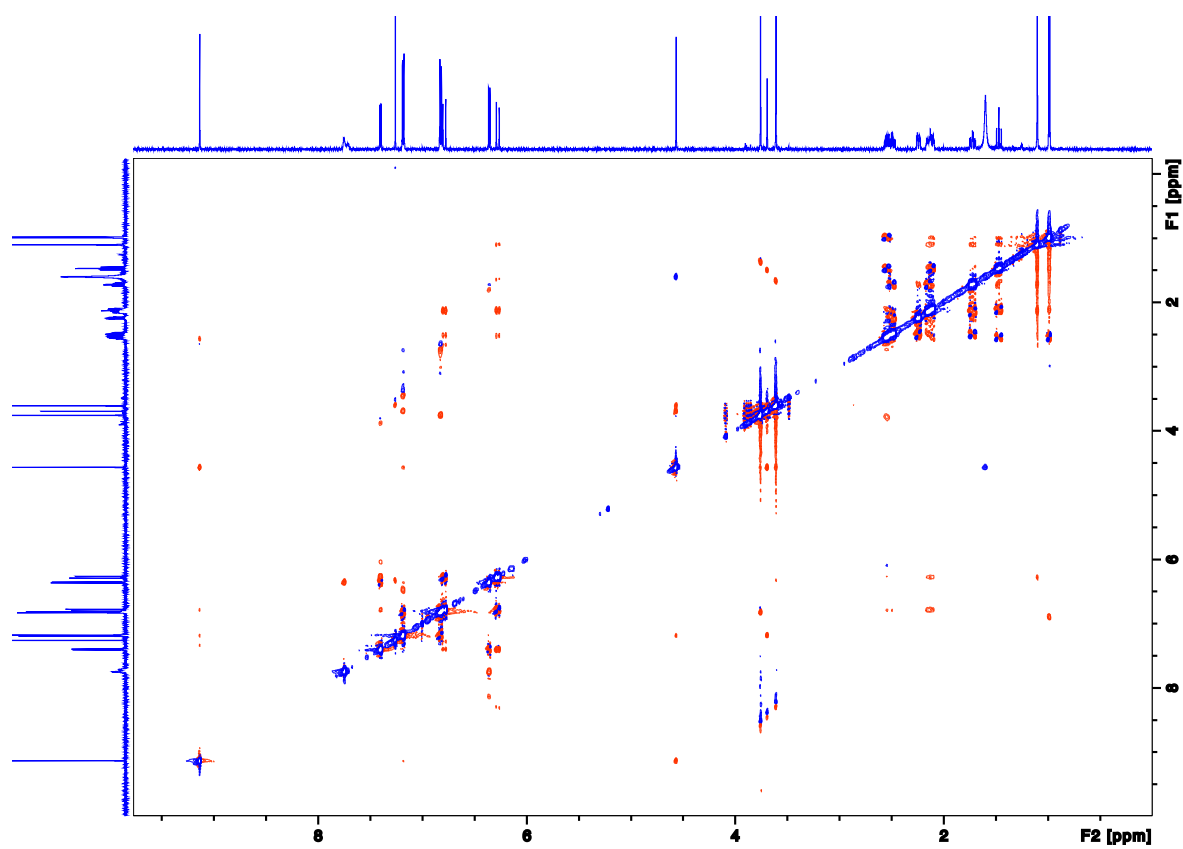

**Figure S31.** ROESY NMR (CDCl<sub>3</sub>) spectrum for aflaquinolone H (**11**).

## Mass Spectrum Molecular Formula Report

### Analysis Info

Analysis Name D:\Data\Taizong\MRF324\_RICE\_F21\_lh20\_f20\_vial 30\_2.d  
 Method tune-medhigh\_AP.m  
 Sample Name MRF324\_RICE\_F21\_lh20\_f20\_vial 30\_2  
 Comment

Acquisition Date 4/8/2020 5:26:39 PM

Operator a.salim  
 Instrument / Ser# micrOTOF 213750.00  
 232

### Acquisition Parameter

|             |            |                      |          |                  |           |
|-------------|------------|----------------------|----------|------------------|-----------|
| Source Type | ESI        | Ion Polarity         | Positive | Set Nebulizer    | 0.5 Bar   |
| Focus       | Not active |                      |          | Set Dry Heater   | 180 °C    |
| Scan Begin  | 100 m/z    | Set Capillary        | 4500 V   | Set Dry Gas      | 5.0 l/min |
| Scan End    | 1500 m/z   | Set End Plate Offset | -500 V   | Set Divert Valve | Source    |

### Generate Molecular Formula Parameter

Formula, min.  
 Formula, max.  
 Measured m/z  
 Check Valence  
 Nitrogen Rule  
 Filter H/C Ratio  
 Estimate Carbon

Tolerance  
 Minimum  
 Electron Configuration  
 Minimum

Charge  
 Maximum  
 Maximum

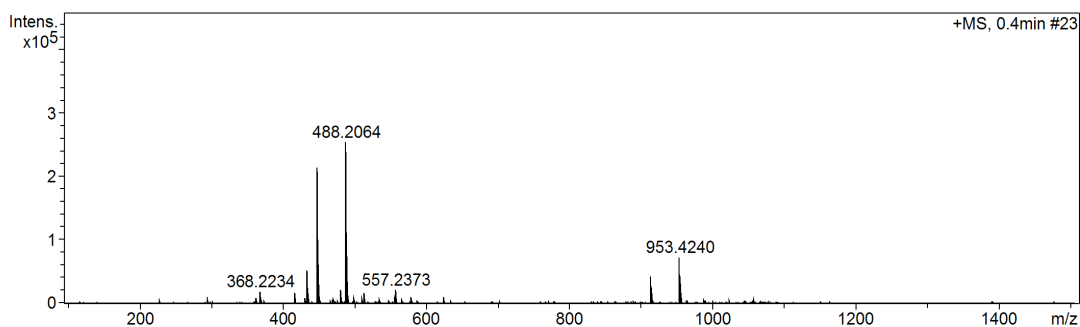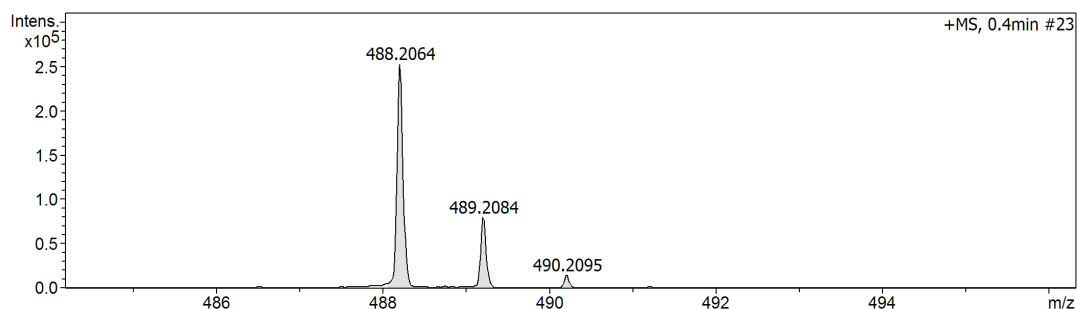

| Meas. m/z | # | Ion Formula  | m/z      | err [ppm] | mSigma | # Sigma | Score  | rdB  | e <sup>-</sup> Conf | N-Rule |
|-----------|---|--------------|----------|-----------|--------|---------|--------|------|---------------------|--------|
| 488.2064  | 1 | C27H31NNaO6  | 488.2044 | -4.1      | 5.8    | 1       | 42.96  | 12.5 | even                | ok     |
|           | 2 | C28H27N5NaO2 | 488.2057 | 1.4       | 6.0    | 2       | 100.00 | 17.5 | even                | ok     |
|           | 3 | C24H23N11Na  | 488.2030 | 6.9       | 7.6    | 3       | 12.35  | 18.5 | even                | ok     |
|           | 4 | C33H27N3Na   | 488.2097 | -6.9      | 29.6   | 4       | 7.68   | 21.5 | even                | ok     |

**Figure S32.** HRMS spectrum and measurement for aflaquinolone H (**11**).

## 4.6 Aflaquinolone I (12)

**Table S8.** 1D and 2D NMR (600 MHz, CDCl<sub>3</sub>) data for aflaquinolone I (12)

| Pos.   | $\delta_{\text{H}}$ , mult, ( <i>J</i> in Hz) | $\delta_{\text{C}}$ | COSY                                   | Key ROESY   | HMBC           |
|--------|-----------------------------------------------|---------------------|----------------------------------------|-------------|----------------|
| 2      |                                               | 165.4               |                                        |             |                |
| 3      | 3.69, br d (1.4)                              | 84.4                |                                        | 4-OH, 12/16 | 2, 3-OMe, 4, 5 |
| 3-OMe  | 3.60, s                                       | 59.0                |                                        |             | 3              |
| 4      |                                               | 78.9                |                                        |             |                |
| 5      |                                               | 111.0               |                                        |             |                |
| 6      |                                               | 155.0               |                                        |             |                |
| 7      |                                               | 123.0               |                                        |             |                |
| 8      | 7.37, d (8.1)                                 | 127.1               | 9                                      |             | 6, 10, 17      |
| 9      | 6.32, d (8.1)                                 | 106.8               | 8                                      |             | 5, 7           |
| 10     |                                               | 134.0               |                                        |             |                |
| 11     |                                               | 129.2               |                                        |             |                |
| 12     | 7.18, d (8.8)                                 | 128.0               | 13                                     | 3           | 4, 14, 16      |
| 13     | 6.83, d (8.8)                                 | 114.5               | 12                                     |             | 11, 14, 15     |
| 14     |                                               | 160.4               |                                        |             |                |
| 14-OMe | 3.76, s                                       | 55.5                |                                        |             | 14             |
| 15     | 6.83, d (8.8)                                 | 114.5               | 16                                     |             |                |
| 16     | 7.18, d (8.8)                                 | 128.0               | 15                                     | 3           |                |
| 17     | 6.61, d (16.8)                                | 121.8               | 18                                     |             | 6, 8, 19       |
| 18     | 6.14, d (16.8)                                | 137.7               | 17                                     |             | 7, 20, 24, 25  |
| 19     |                                               | 37.2                |                                        |             |                |
| 20     | a. 1.74, m<br>b. 1.07, m                      | 46.1                | 20b, 21<br>20a, 21                     |             | 18             |
| 21     | 1.57 <sup>A</sup>                             | 36.3                | 20a, 20b, 22, 26                       |             |                |
| 22     | 3.12, ddd (10.5, 10.5, 4.5)                   | 77.3                | 21, 23a, 23b                           |             |                |
| 23     | a. 1.77, m<br>b. 1.51 <sup>A</sup>            | 32.1                | 22, 23b, 24a, 24b<br>22, 23a, 24a, 24b |             |                |
| 24     | a. 1.82, m<br>b. 1.37, td (13.7, 3.5)         | 36.9                | 23a, 23b, 24b<br>23a, 23b, 24a         |             |                |
| 25     | 1.03, s                                       | 31.3                |                                        |             | 18, 20, 24     |
| 26     | 0.98, d (6.4)                                 | 18.8                |                                        |             | 20, 21, 22     |
| 1-NH   | 7.35, br s                                    |                     |                                        |             | 3, 5           |
| 4-OH   | 4.54, s                                       |                     |                                        | 3, 3-OMe    | 4, 11          |
| 6-OH   | 9.08, s                                       |                     |                                        |             | 6, 7           |

<sup>A</sup>Resonances obscured by solvent, observed by HSQC.

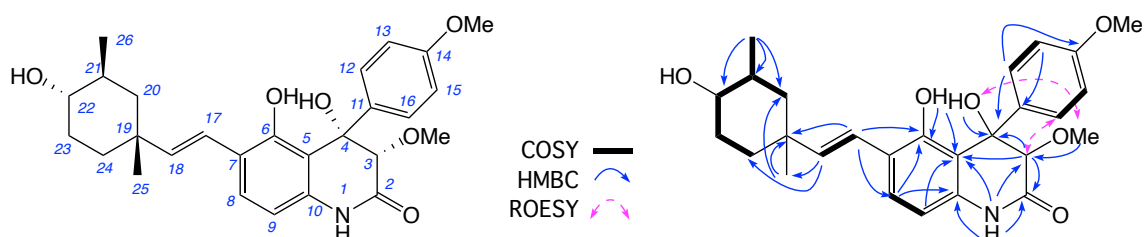

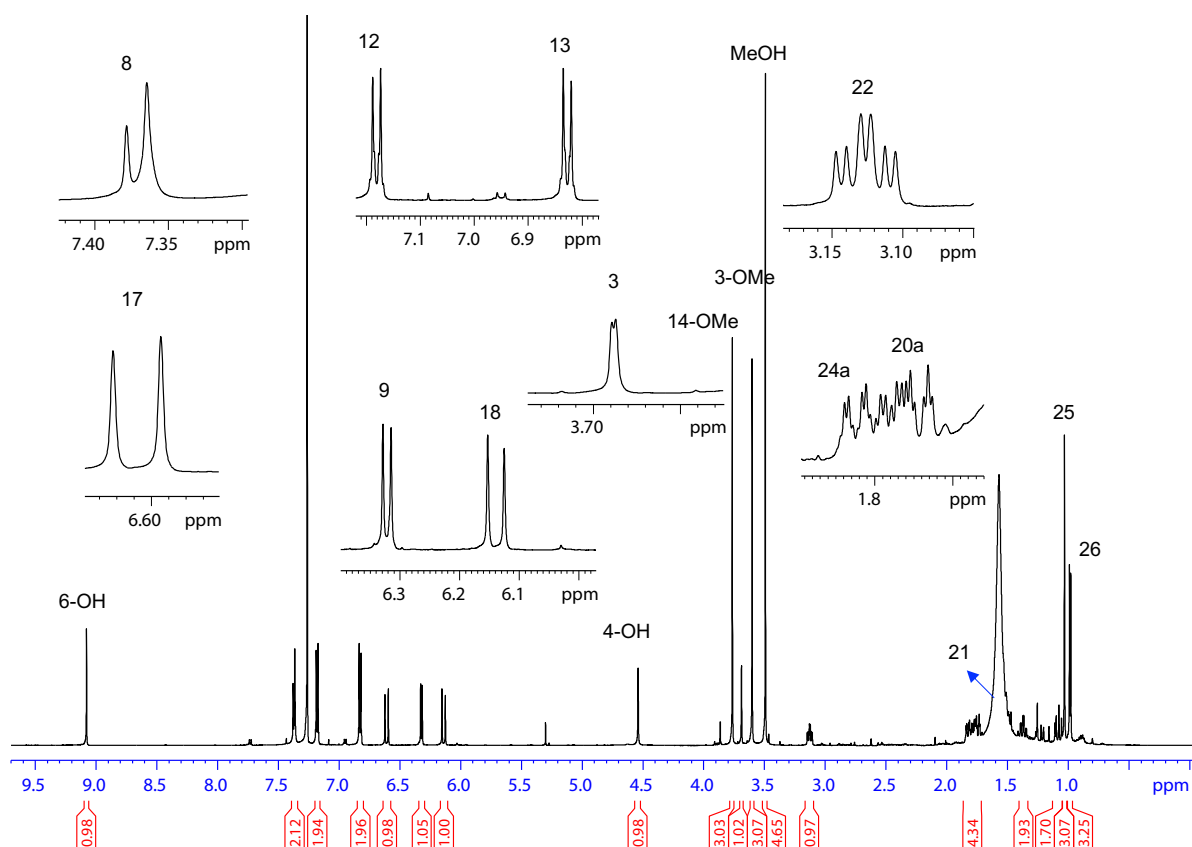

**Figure S33.**  $^1\text{H}$  NMR (600 MHz,  $\text{CDCl}_3$ ) spectrum for aflaquinolone I (**12**).

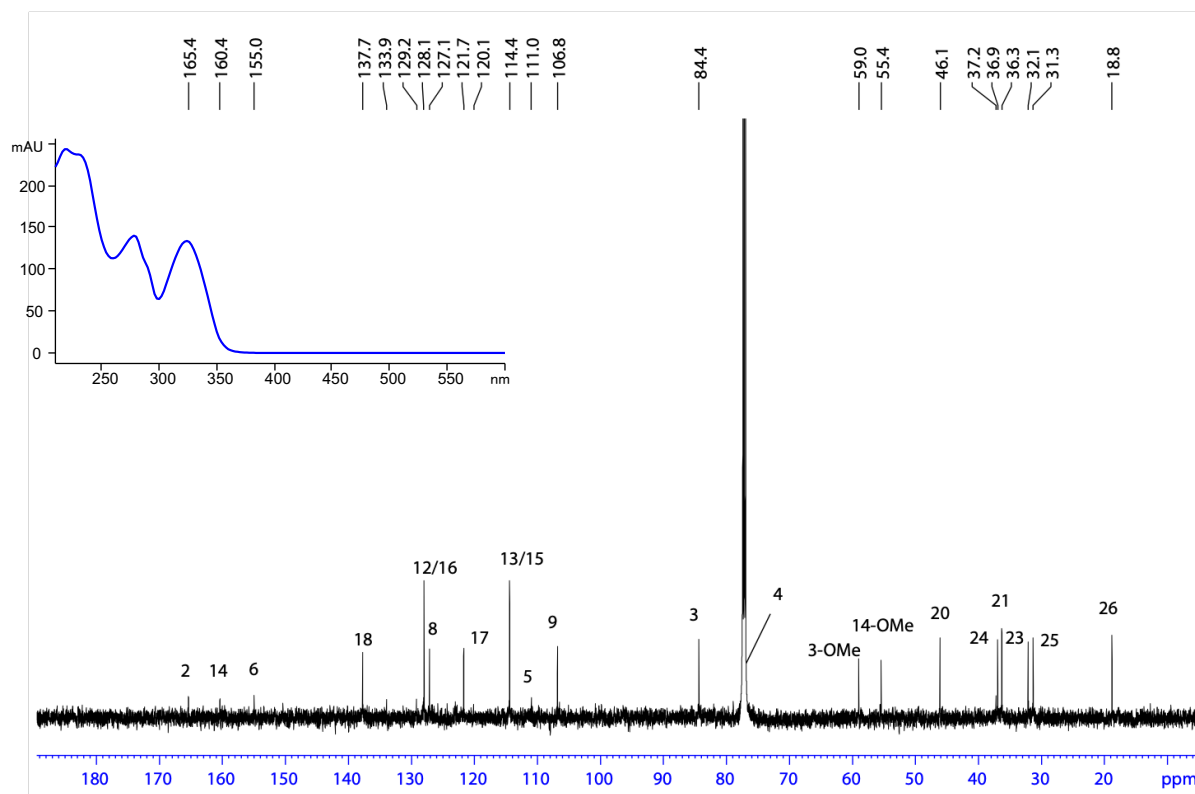

**Figure S34.**  $^{13}\text{C}$  NMR (150 MHz,  $\text{CDCl}_3$ ) and UV-vis (inset) spectra for aflaquinolone I (**12**).

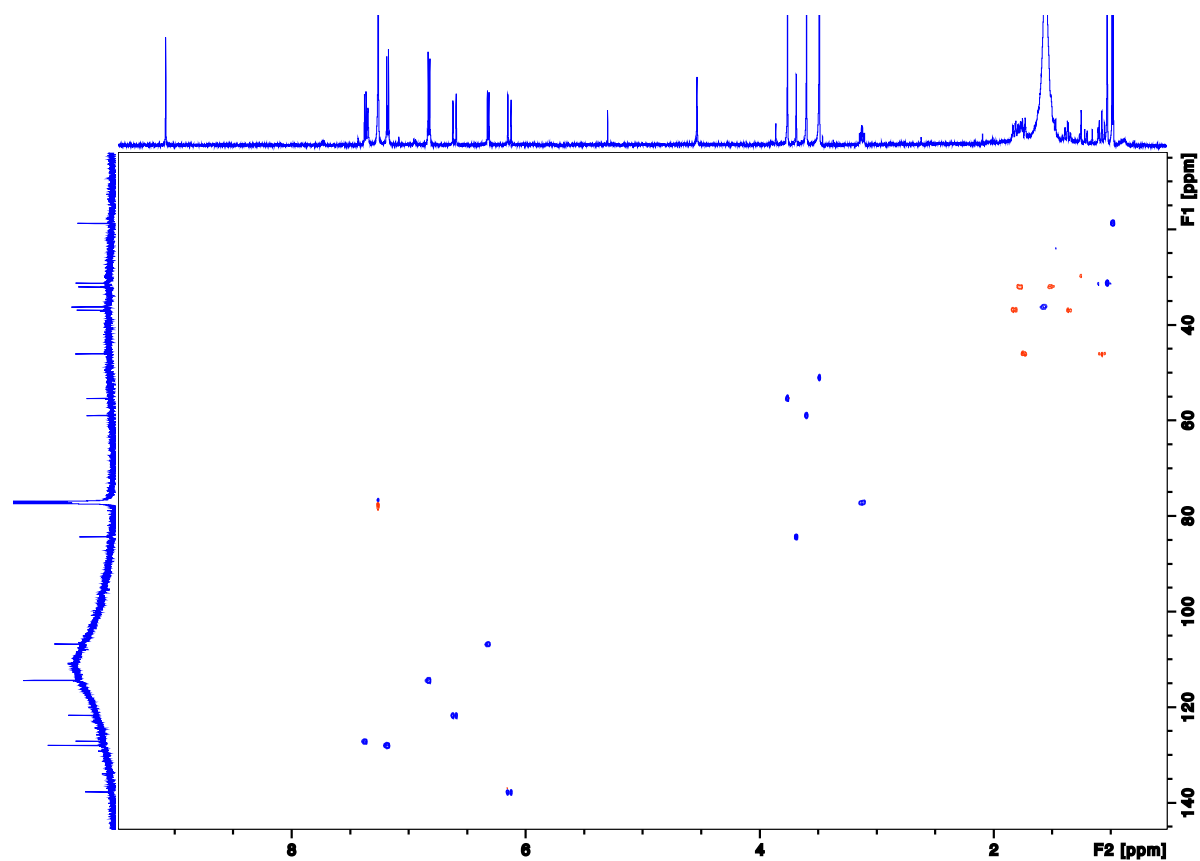

**Figure S35.** HSQC NMR (CDCl<sub>3</sub>) spectrum for aflaquinolone I (**12**).

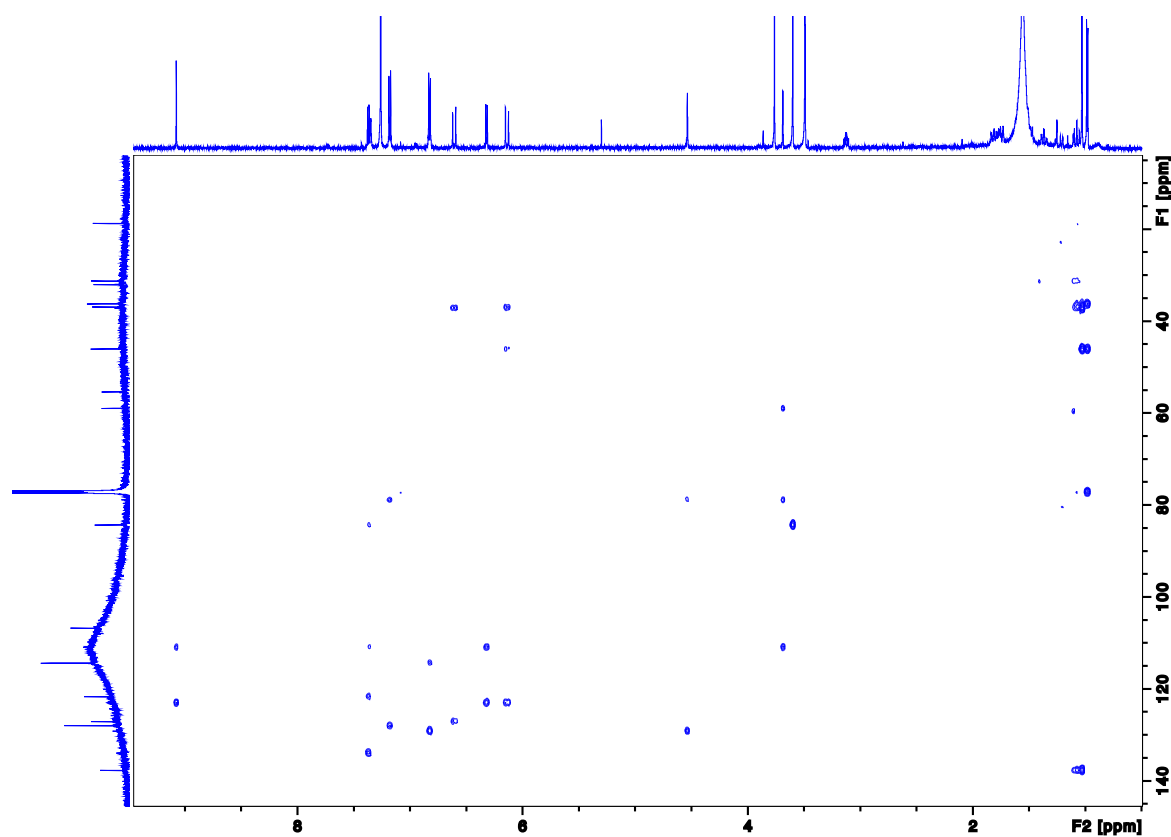

**Figure S36.** HMBC NMR (CDCl<sub>3</sub>) spectrum for aflaquinolone I (**12**).

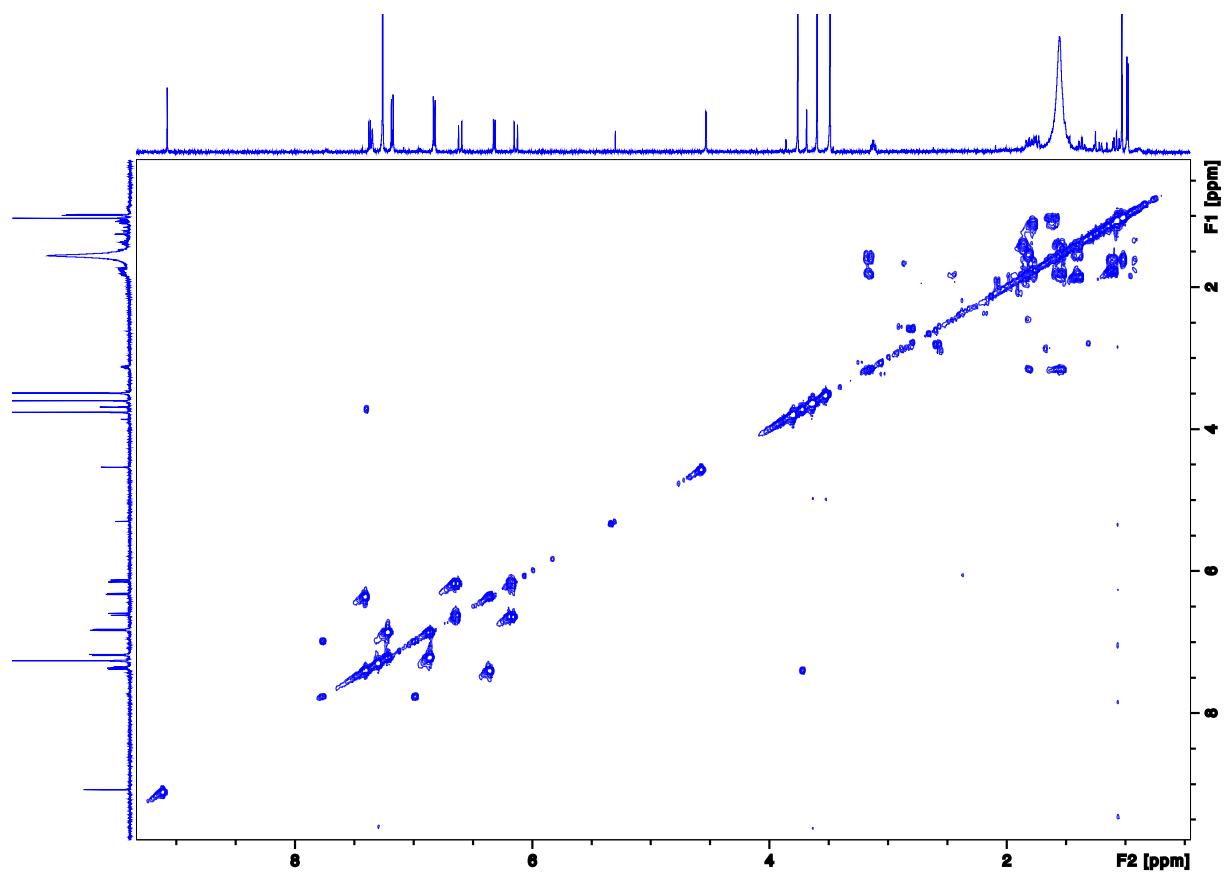

Figure S37. COSY NMR (CDCl<sub>3</sub>) spectrum for aflaquinolone I (12).

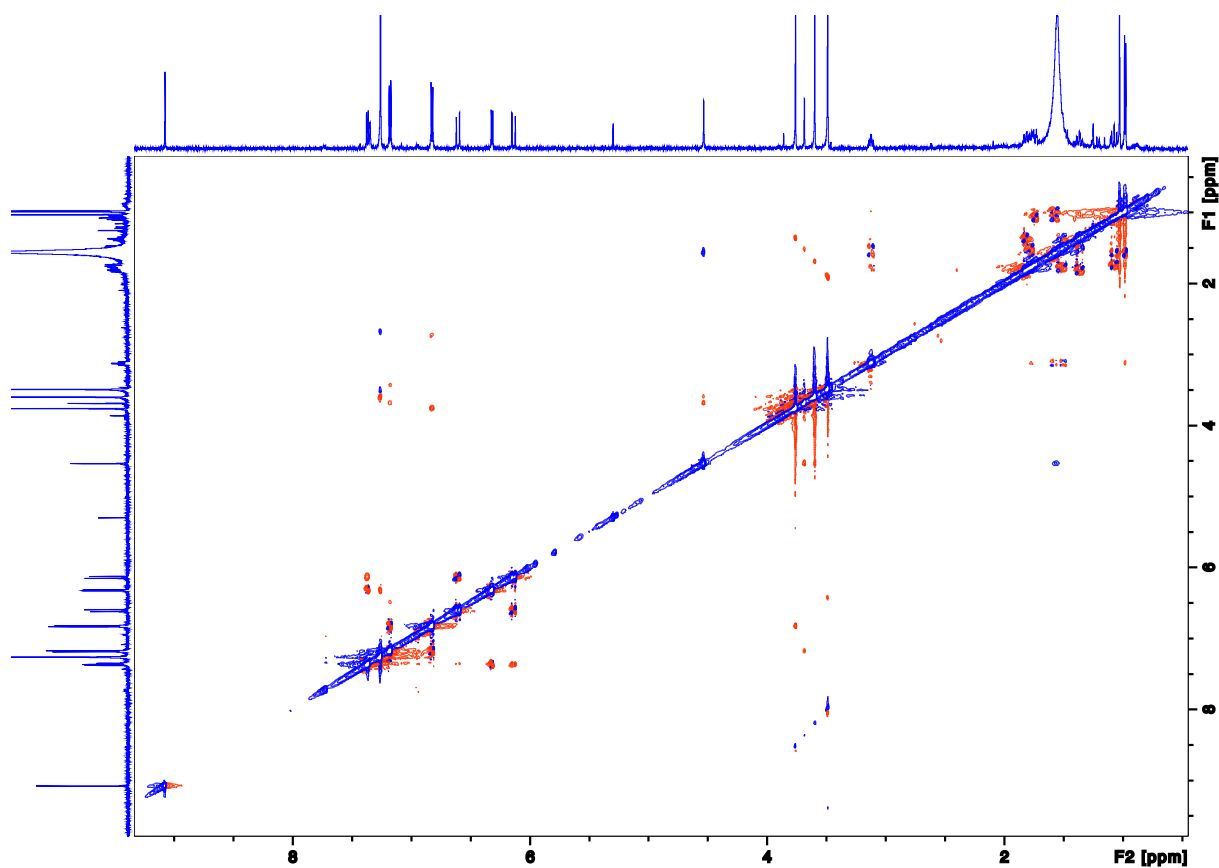

Figure S38. ROESY NMR (CDCl<sub>3</sub>) spectrum for aflaquinolone I (12).

## Mass Spectrum Molecular Formula Report

### Analysis Info

Analysis Name D:\Data\Taizong\MRF324\_RICE\_F21\_lh20\_f20\_vial 12.d  
 Method tune-medhigh\_AP.m  
 Sample Name MRF324\_RICE\_F21\_lh20\_f20\_vial 12  
 Comment

Acquisition Date 4/8/2020 5:32:03 PM

Operator a.salim  
 Instrument / Ser# micrOTOF 213750.00  
 232

### Acquisition Parameter

|             |            |                      |          |                  |           |
|-------------|------------|----------------------|----------|------------------|-----------|
| Source Type | ESI        | Ion Polarity         | Positive | Set Nebulizer    | 0.5 Bar   |
| Focus       | Not active |                      |          | Set Dry Heater   | 180 °C    |
| Scan Begin  | 100 m/z    | Set Capillary        | 4500 V   | Set Dry Gas      | 5.0 l/min |
| Scan End    | 1500 m/z   | Set End Plate Offset | -500 V   | Set Divert Valve | Source    |

### Generate Molecular Formula Parameter

|                  |                        |         |
|------------------|------------------------|---------|
| Formula, min.    |                        |         |
| Formula, max.    |                        |         |
| Measured m/z     | Tolerance              | Charge  |
| Check Valence    | Minimum                | Maximum |
| Nitrogen Rule    | Electron Configuration |         |
| Filter H/C Ratio | Minimum                | Maximum |
| Estimate Carbon  |                        |         |

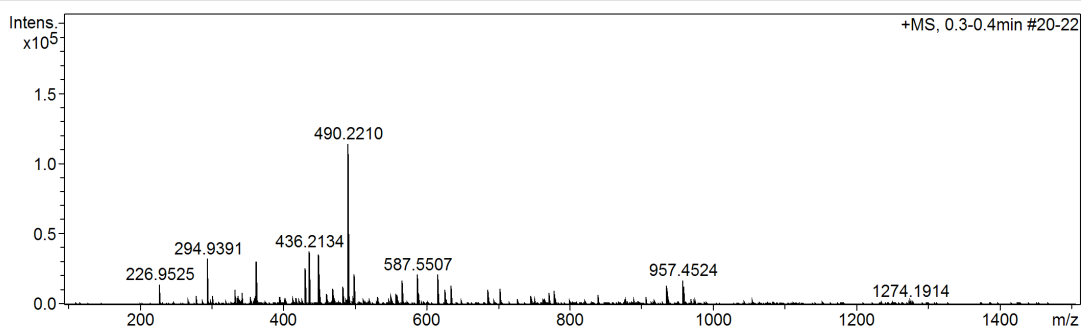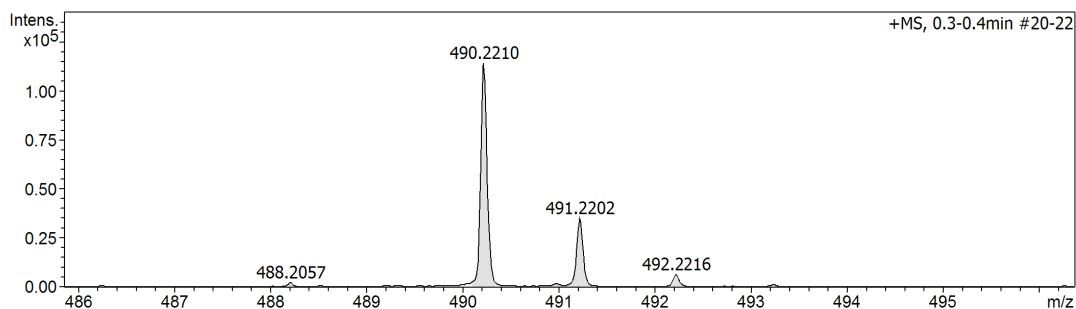

| Meas. m/z | # | Ion Formula  | m/z      | err [ppm] | mSigma | # Sigma | Score  | rdb  | e <sup>-</sup> Conf | N-Rule |
|-----------|---|--------------|----------|-----------|--------|---------|--------|------|---------------------|--------|
| 490.2210  | 1 | C27H33NNaO6  | 490.2200 | 2.0       | 2.9    | 1       | 81.19  | 11.5 | even                | ok     |
|           | 2 | C24H25N11Na  | 490.2187 | -4.8      | 5.8    | 2       | 30.24  | 17.5 | even                | ok     |
|           | 3 | C28H29N5NaO2 | 490.2213 | 0.7       | 9.5    | 3       | 100.00 | 16.5 | even                | ok     |
|           | 4 | C23H29N7NaO4 | 490.2173 | -7.5      | 14.4   | 4       | 7.03   | 12.5 | even                | ok     |

**Figure S39.** HRMS spectrum and measurement for aflaquinolone I (**12**).

## 4.7 Terrecyclic acid A (13)

**Table S9.** 1D and 2D NMR (600 MHz, DMSO-*d*<sub>6</sub>) data for terrecyclic acid A (13)

| Pos. | $\delta_{\text{H}}$ , mult, ( <i>J</i> in Hz)        | $\delta_{\text{C}}$ | COSY                               | ROESY            | HMBC                                    |
|------|------------------------------------------------------|---------------------|------------------------------------|------------------|-----------------------------------------|
| 1    |                                                      | 54.5                |                                    |                  |                                         |
| 2    | 2.92, dd (10.6, 9.4)                                 | 45.9                | 3a, 3b                             |                  | 8, 10, 12, 13                           |
| 3    | a. 2.55, dd (10.2, 11.7)<br>b. 2.45, dd (19.2, 9.4)  | 41.1                | 2, 3b<br>2, 3a                     | 10b, 11, 14      | 2, 4, 11<br>1, 4, 5                     |
| 4    |                                                      | 206.6               |                                    |                  |                                         |
| 5    |                                                      | 151.7               |                                    |                  |                                         |
| 6    | a. 5.72, s<br>b. 5.17, s                             | 114.5               | 6b<br>6a                           | 6b<br>6a         | 1, 4, 5<br>1, 4, 5                      |
| 7    |                                                      | 176.0               |                                    |                  |                                         |
| 8    | 2.99, d (8.2)                                        | 47.2                | 9a, 9b                             | 9a, 12a          | 1, 2, 7, 9, 10, 12                      |
| 9    | a. 2.10, m<br>b. 1.74 <sup>A</sup>                   | 22.3                | 8, 9b, 10a, 10b<br>8, 9a, 10a, 10b | 8, 15            | 7, 8, 10<br>1, 7, 10, 11                |
| 10   | a. 1.74 <sup>A</sup><br>b. 1.65 <sup>B</sup>         | 28.9                | 9, 10b, 11<br>9, 10a               |                  | 11<br>8                                 |
| 11   | 1.88, br s                                           | 48.4                | 10a                                | 10a, 10b, 14, 15 | 1, 9, 12                                |
| 12   | a. 1.80, d (14.4)<br>b. 1.63 <sup>B</sup> , d (14.4) | 53.1                | 12b<br>12a                         | 8, 14, 15<br>14  | 1, 8, 13, 14, 15<br>1, 5, 8, 13, 14, 15 |
| 13   |                                                      | 40.0                |                                    |                  |                                         |
| 14   | 1.19, s                                              | 34.6                |                                    | 3, 11, 12a, 12b  | 11, 12, 13, 15                          |
| 15   | 1.14, s                                              | 27.1                |                                    | 9a, 11, 12a      | 11, 12, 13, 14                          |

<sup>A-B</sup> Resonances with same letter overlapped.

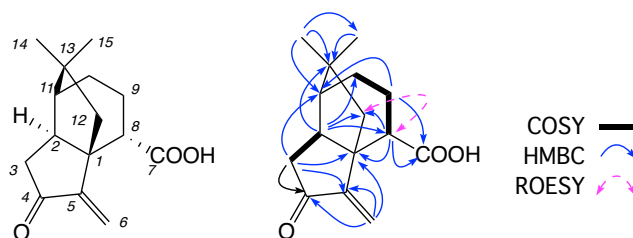

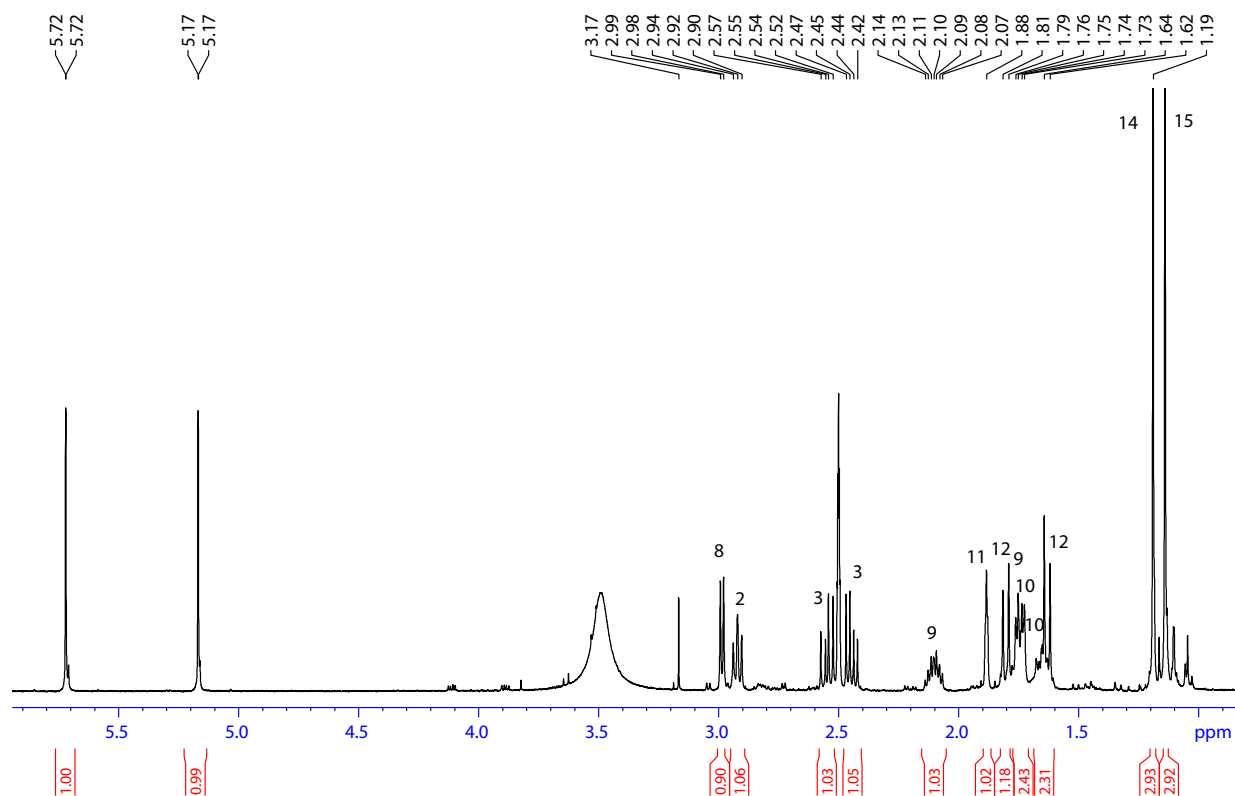

**Figure S40.** <sup>1</sup>H NMR (600 MHz, DMSO-*d*<sub>6</sub>) spectrum for terrecyclic acid A (**13**).

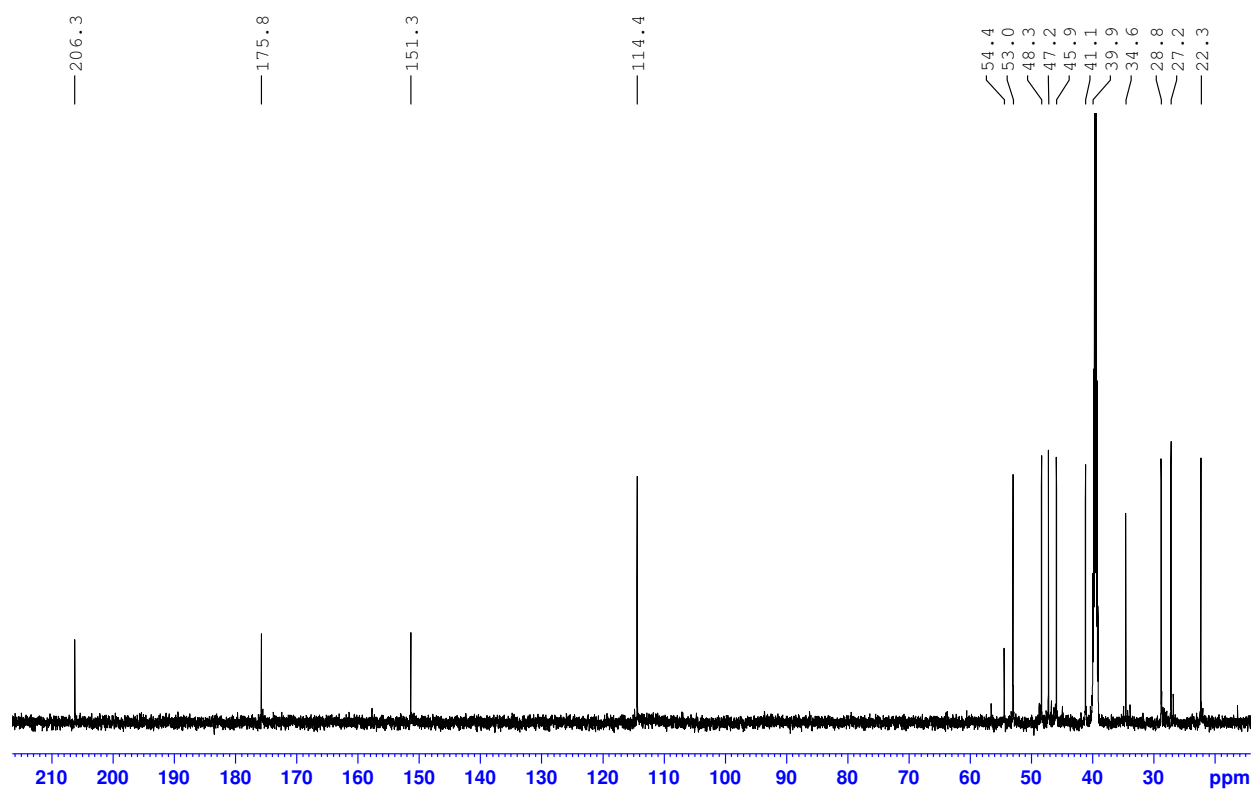

**Figure S41.** <sup>13</sup>C NMR (150 MHz, DMSO-*d*<sub>6</sub>) spectrum for terrecyclic acid A (**13**).

# Mass Spectrum Molecular Formula Report

## Analysis Info

Analysis Name D:\Data\Taizong\MRF324\_rice\_fr17\_vial 6.d  
Method tune-medhigh\_AP.m  
Sample Name MRF324\_rice\_fr17\_vial 6  
Comment

Acquisition Date 3/24/2020 10:19:30 AM

Operator a.salim  
Instrument / Ser# micrOTOF 213750.00  
232

## Acquisition Parameter

|             |            |                      |          |                  |           |
|-------------|------------|----------------------|----------|------------------|-----------|
| Source Type | ESI        | Ion Polarity         | Positive | Set Nebulizer    | 0.5 Bar   |
| Focus       | Not active |                      |          | Set Dry Heater   | 180 °C    |
| Scan Begin  | 100 m/z    | Set Capillary        | 4500 V   | Set Dry Gas      | 5.0 l/min |
| Scan End    | 1500 m/z   | Set End Plate Offset | -500 V   | Set Divert Valve | Source    |

## Generate Molecular Formula Parameter

|                  |                        |         |
|------------------|------------------------|---------|
| Formula, min.    |                        |         |
| Formula, max.    |                        |         |
| Measured m/z     | Tolerance              | Charge  |
| Check Valence    | Minimum                | Maximum |
| Nitrogen Rule    | Electron Configuration |         |
| Filter H/C Ratio | Minimum                | Maximum |
| Estimate Carbon  |                        |         |

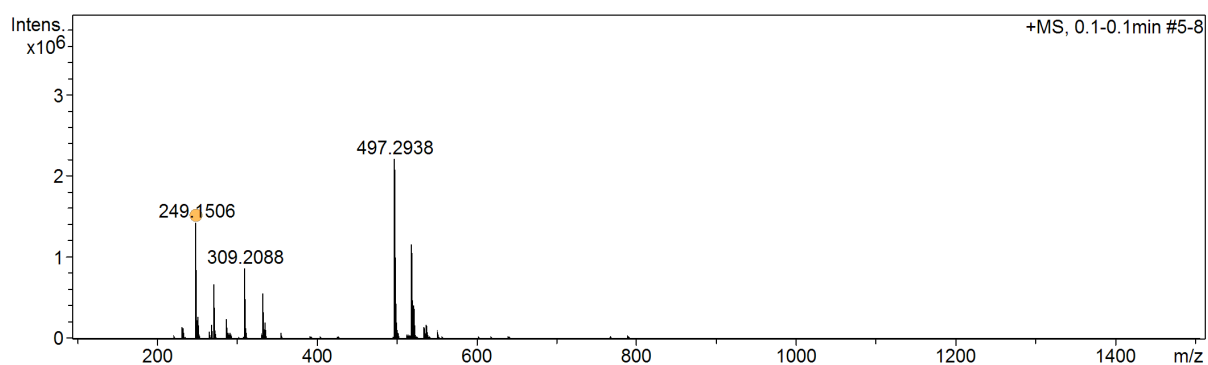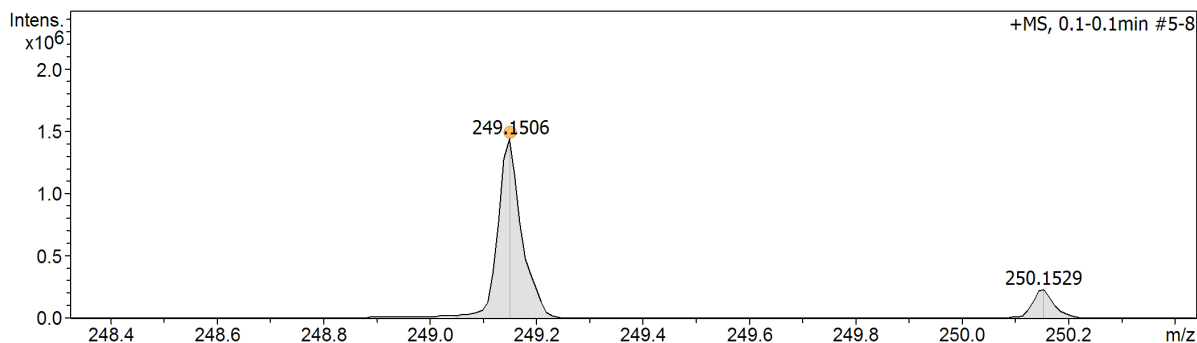

| Meas. m/z | # | Ion Formula                                    | m/z      | err [ppm] | mSigma | # Sigma | Score  | rdb | e <sup>-</sup> Conf | N-Rule |
|-----------|---|------------------------------------------------|----------|-----------|--------|---------|--------|-----|---------------------|--------|
| 249.1506  | 1 | C <sub>15</sub> H <sub>21</sub> O <sub>3</sub> | 249.1485 | 8.5       | 96.2   | 1       | 100.00 | 5.5 | even                | ok     |

**Figure S42.** HRMS spectrum and measurement for terrecyclic acid A (13).

## 4.8 Aspulvinone Y (14)

**Table S10.** 1D and 2D NMR (600 MHz, methanol-*d*<sub>4</sub>) data for aspulvinone Y (**14**)

| Pos. | $\delta_{\text{H}}$ , mult, ( <i>J</i> in Hz)      | $\delta_{\text{C}}$ | COSY                   | HMBC                                               |
|------|----------------------------------------------------|---------------------|------------------------|----------------------------------------------------|
| 1    |                                                    | -                   |                        |                                                    |
| 2    |                                                    | 101.6               |                        |                                                    |
| 3    |                                                    | 164.2               |                        |                                                    |
| 4    |                                                    | 142.3               |                        |                                                    |
| 5    | 6.38, s                                            | 108.0               |                        | 3, 4, 2'', 6''                                     |
| 1'   |                                                    | 122.6               |                        |                                                    |
| 2'   | 7.64, d (1.5)                                      | 129.7               |                        | 2, 6', 4', 7'                                      |
| 3'   |                                                    | 121.7               |                        |                                                    |
| 4'   |                                                    | 154.3               |                        |                                                    |
| 5'   | 6.73, d (8.3)                                      | 117.6               | 6'                     | 1', 4', 3'                                         |
| 6'   | 7.62, dd (8.3, 1.5)                                | 127.7               | 5'                     | 2, 4', 2'                                          |
| 7'   | 2.83, t (6.8)                                      | 23.1                | 8'                     | 4', 3', 2', 8', 9'                                 |
| 8'   | 1.84, t (6.8)                                      | 33.5                | 7'                     | 3', 7', 9', 10', 11'                               |
| 9'   |                                                    | 75.2                |                        |                                                    |
| 10'  | 1.33, s                                            | 26.8                |                        | 8', 9', 11'                                        |
| 11'  | 1.33, s                                            | 26.8                |                        | 8', 9', 10'                                        |
| 1''  |                                                    | 126.3               |                        |                                                    |
| 2''  | 7.57, s                                            | 133.1               |                        | 5, 4'', 6'', 7''                                   |
| 3''  |                                                    | 121.4               |                        |                                                    |
| 4''  |                                                    | 155.0               |                        |                                                    |
| 5''  | 6.78, d (8.6)                                      | 118.1               | 6''                    | 1'', 3'', 4''                                      |
| 6''  | 7.51, d (1.5)                                      | 130.9               | 5''                    | 5, 2'', 4''                                        |
| 7''  | a. 3.07, dd (16.4, 5.0)<br>b. 2.78, dd (16.4, 7.3) | 31.8                | 7''b, 8''<br>7''a, 8'' | 2'', 3'', 4'', 8'', 9''<br>2'', 3'', 4'', 8'', 9'' |
| 8''  | 3.79, dd (7.3, 5.0)                                | 69.9                | 7''a, 7''b             | 3'', 10'', 11''                                    |
| 9''  |                                                    | 78.5                |                        |                                                    |
| 10'' | 1.29, s                                            | 21.1                |                        | 8'', 9'', 11''                                     |
| 11'' | 1.35, s                                            | 25.6                |                        | 8'', 9'', 10''                                     |

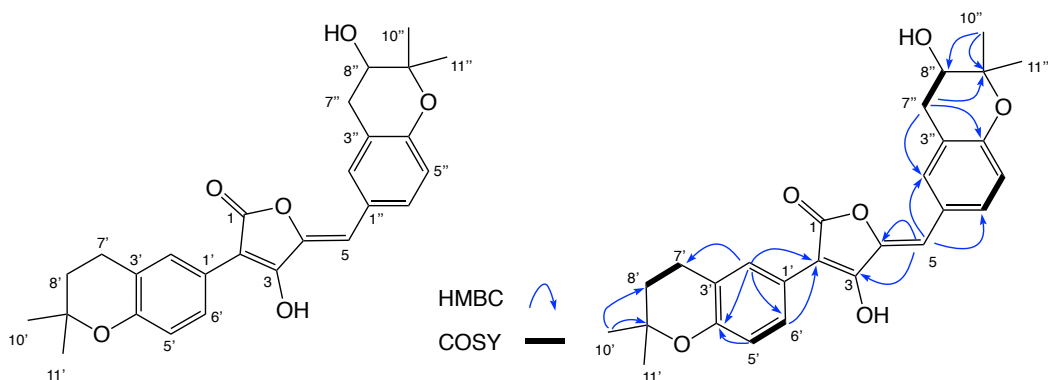

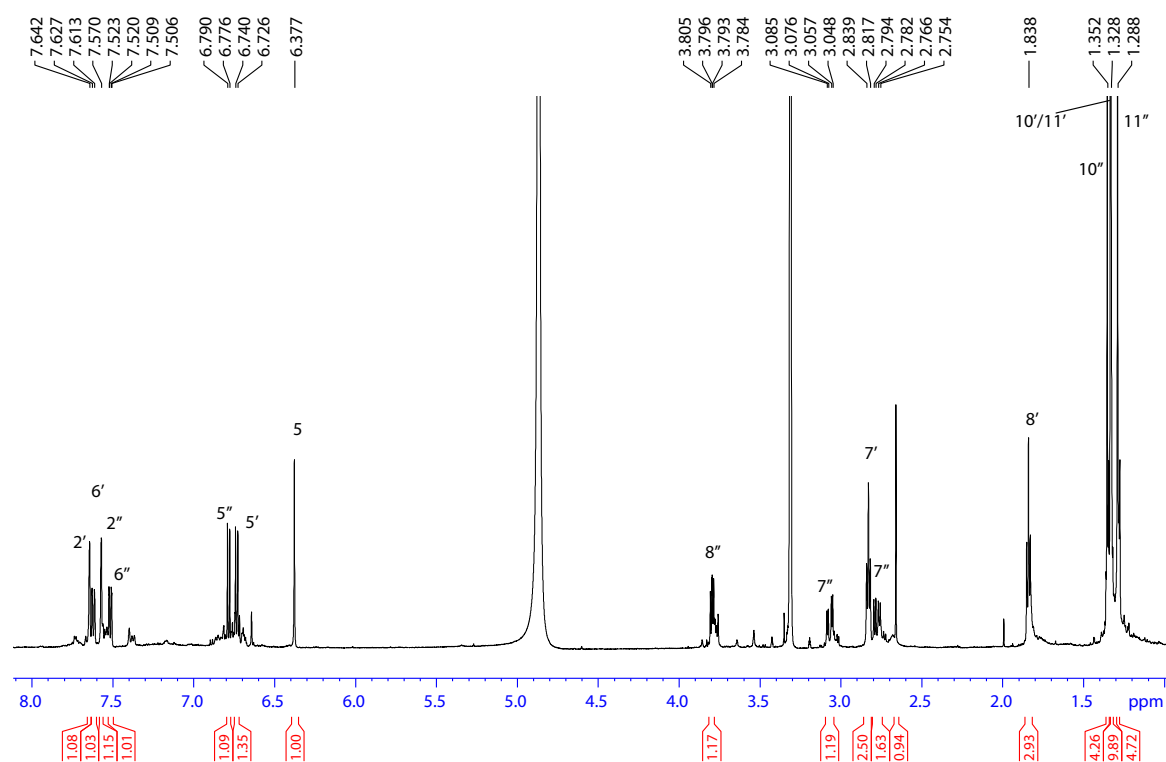

**Figure S43.**  $^1\text{H}$  NMR (600 MHz, acetone- $d_6$ ) spectrum for aspulvinone Y (**14**).

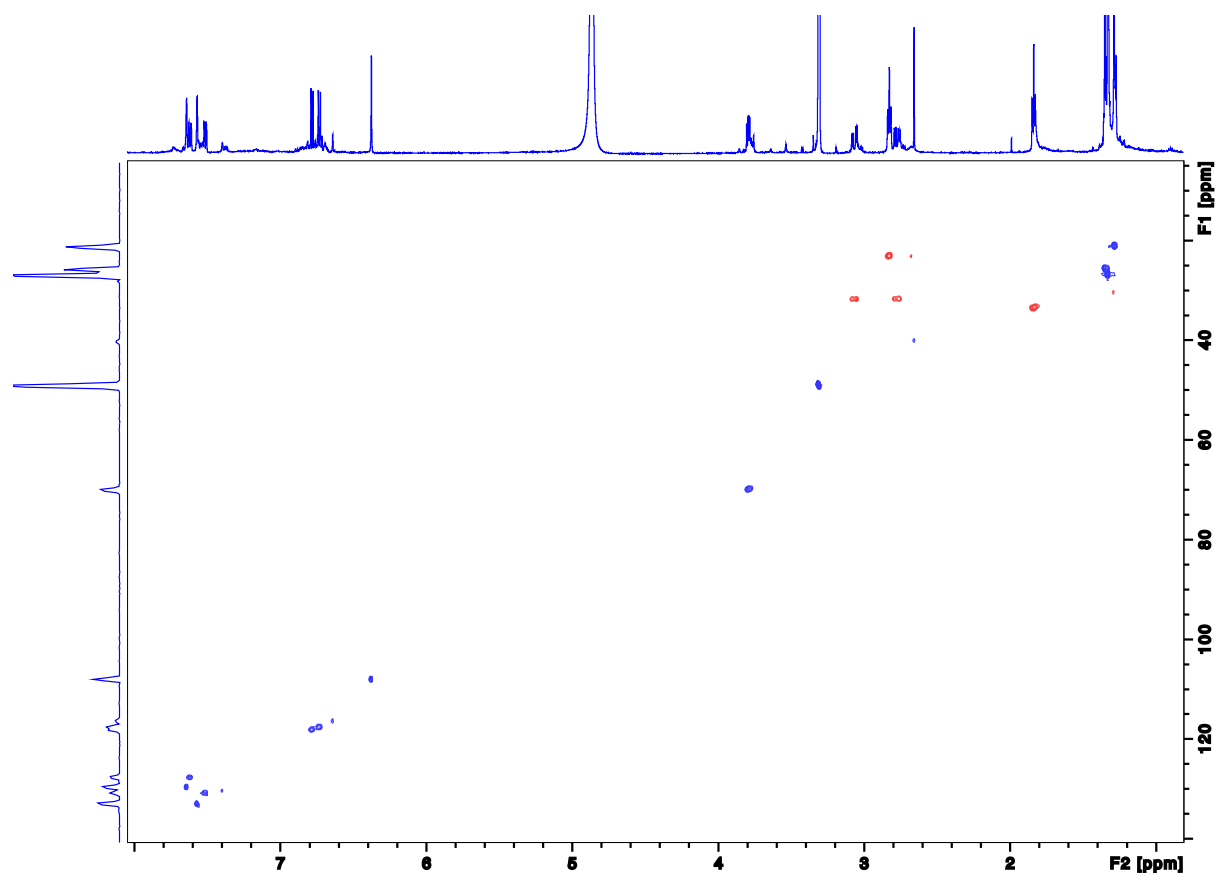

**Figure S44.** HSQC NMR (600 MHz, acetone- $d_6$ ) spectrum for aspulvinone Y (**14**).

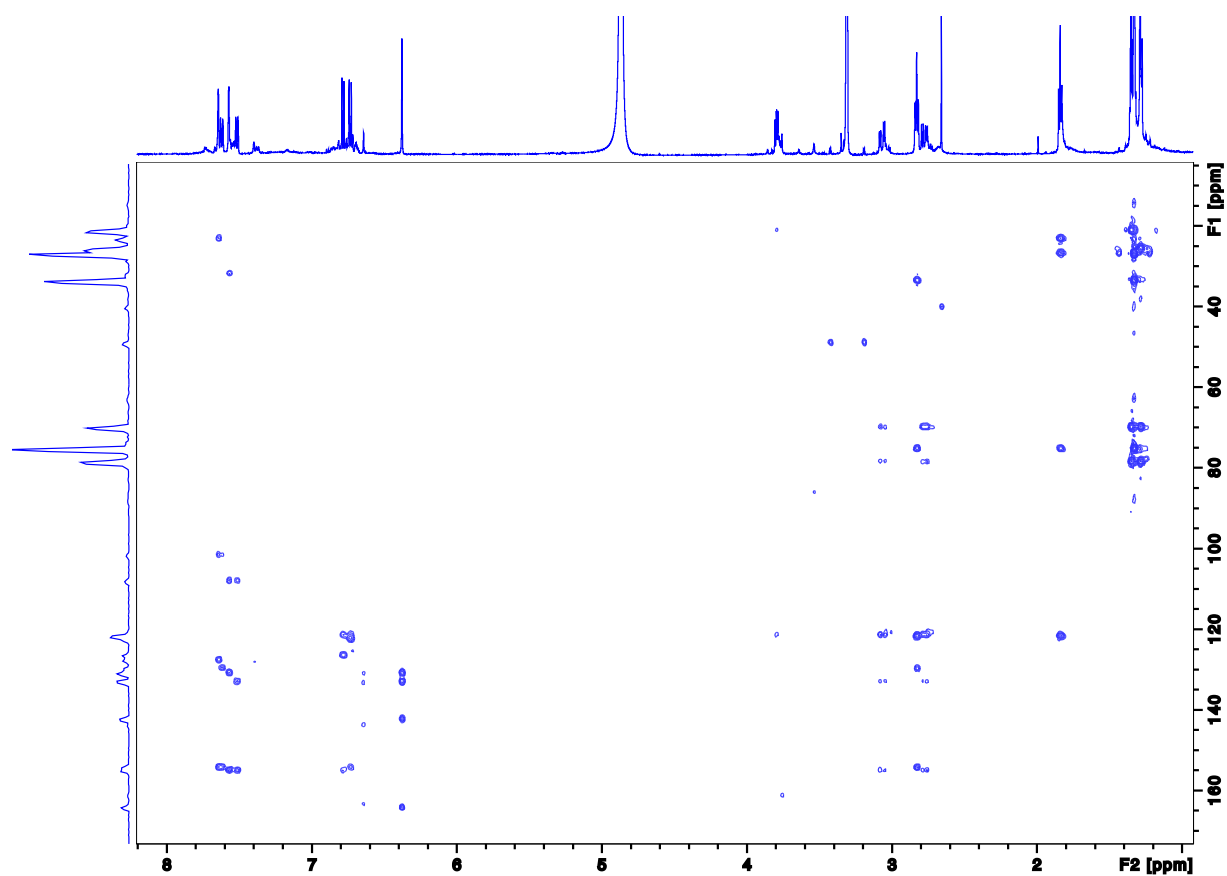

**Figure S45.** HMBC NMR (600 MHz, acetone-*d*<sub>6</sub>) spectrum for aspulvinone Y (**14**).

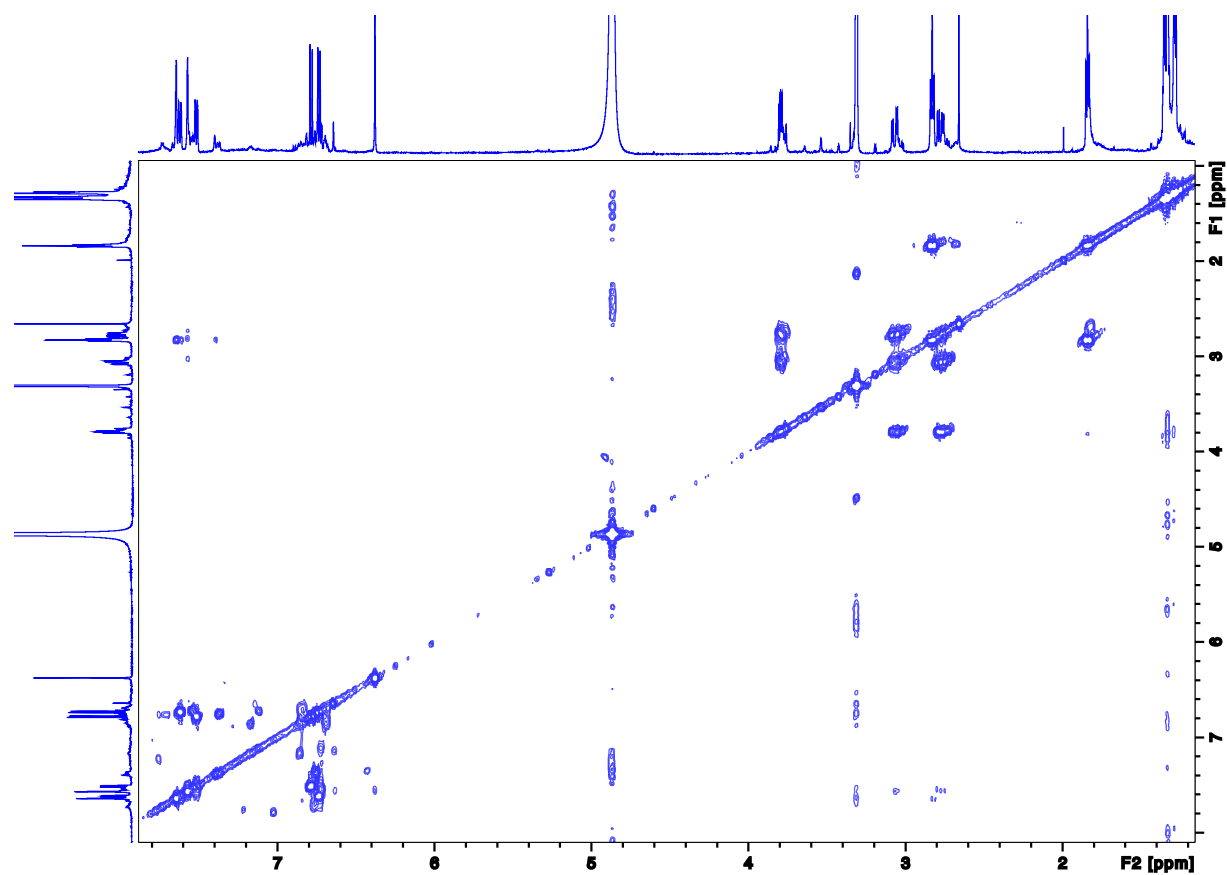

**Figure S46.** COSY NMR (600 MHz, acetone-*d*<sub>6</sub>) spectrum for aspulvinone Y (**14**).

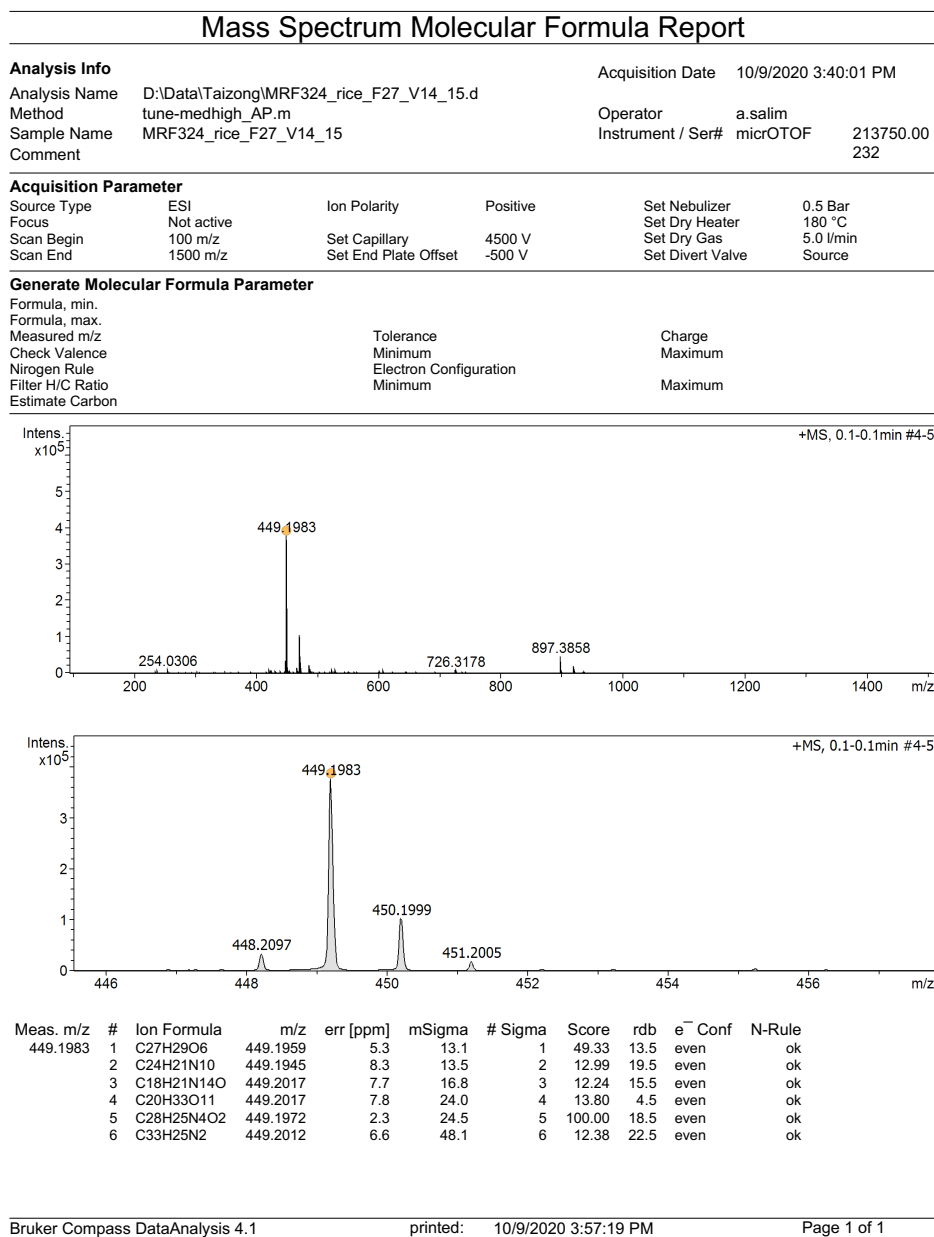

**Figure S47.** HRMS spectrum and measurement for aspulvinone Y (**14**).

## 4.9 Aspulvinone N-CR (15)

**Table S11.** 1D and 2D NMR (600 MHz, acetone-*d*<sub>6</sub>) data for aspulvinone N-CR (15)\*

| Pos. | $\delta_{\text{H}}$ , mult, ( <i>J</i> in Hz)      | $\delta_{\text{C}}$ | HMBC                                               |
|------|----------------------------------------------------|---------------------|----------------------------------------------------|
| 1    |                                                    |                     |                                                    |
| 2    |                                                    | 98.4                |                                                    |
| 3    |                                                    | 164.5               |                                                    |
| 4    |                                                    | 140.5               |                                                    |
| 5    | 6.24, s                                            | 105.7               | 3, 4, 2'', 6''                                     |
| 1'   |                                                    | 111.2               |                                                    |
| 2'   | 7.71, s                                            | 130.1               | 2, 6', 4', 7'                                      |
| 3'   |                                                    | 113.4               |                                                    |
| 4'   |                                                    | 155.1               |                                                    |
| 5'   | 6.38, s                                            | 104.6               | 1', 6', 4', 3'                                     |
| 6'   |                                                    | 153.7               |                                                    |
| 7'   | 2.72, t (6.7)                                      | 22.2                | 4', 3', 2', 8', 9'                                 |
| 8'   | 1.80, t (6.7)                                      | 33.4                | 3', 7', 9', 10', 11'                               |
| 9'   |                                                    | 74.8                |                                                    |
| 10'  | 1.30, s                                            | 26.9                | 8', 9', 11'                                        |
| 11'  | 1.30, s                                            | 26.9                | 8', 9', 10'                                        |
| 1''  |                                                    | 126.7               |                                                    |
| 2''  | 7.54, d (2.0)                                      | 132.6               | 5, 4'', 6'', 7''                                   |
| 3''  |                                                    | 121.5               |                                                    |
| 4''  |                                                    | 154.4               |                                                    |
| 5''  | 6.78, d (8.5)                                      | 117.6               | 1'', 3'', 4''                                      |
| 6''  | 7.55, dd (8.5, 2.0)                                | 130.2               | 5, 2'', 4''                                        |
| 7''  | a. 3.05, dd (16.5, 5.2)<br>b. 2.78, dd (16.5, 7.8) | 32.0                | 2'', 3'', 4'', 8'', 9''<br>2'', 3'', 4'', 8'', 9'' |
| 8''  | 3.82, dd (7.8, 5.2)                                | 69.4                | 3''                                                |
| 9''  |                                                    | 78.3                |                                                    |
| 10'' | 1.27, s                                            | 20.7                |                                                    |
| 11'' | 1.36, s                                            | 25.8                |                                                    |

\*COSY NMR data was not acquired due to fast decomposition of compound.

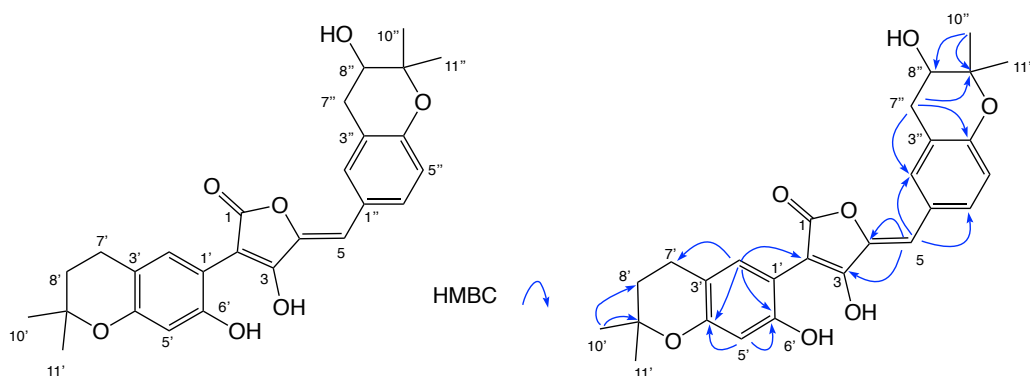

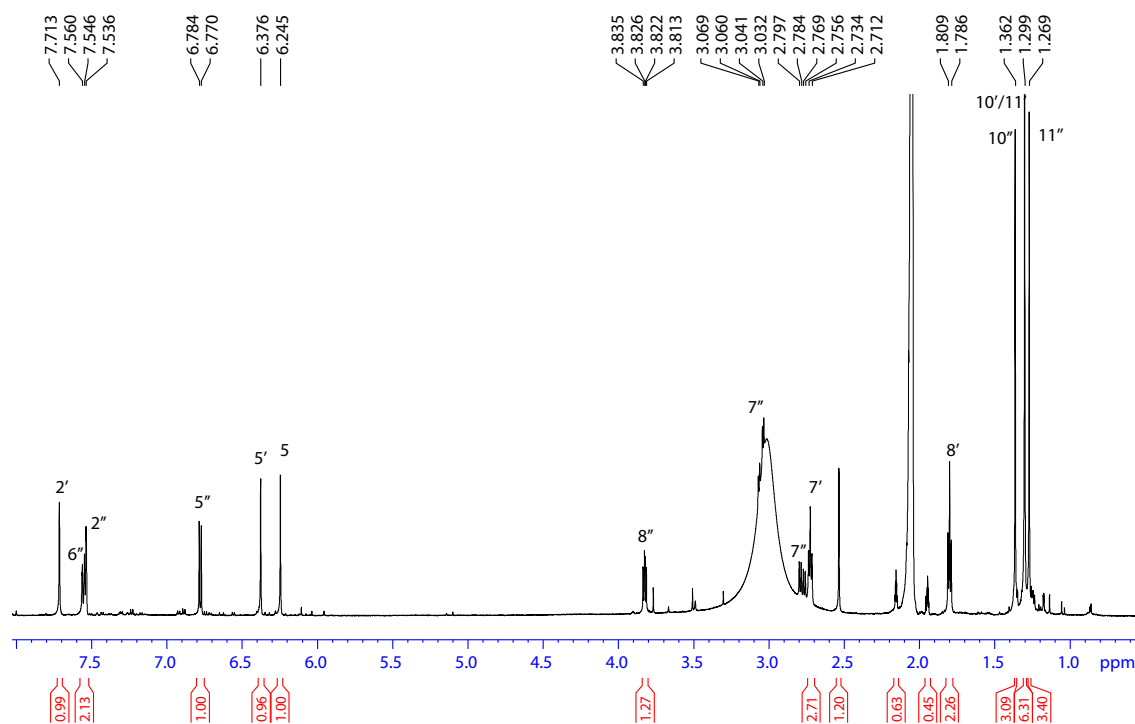

**Figure S48.**  $^1\text{H}$  NMR (600 MHz, acetone- $d_6$ ) spectrum for aspulvinone N-CR (**15**).

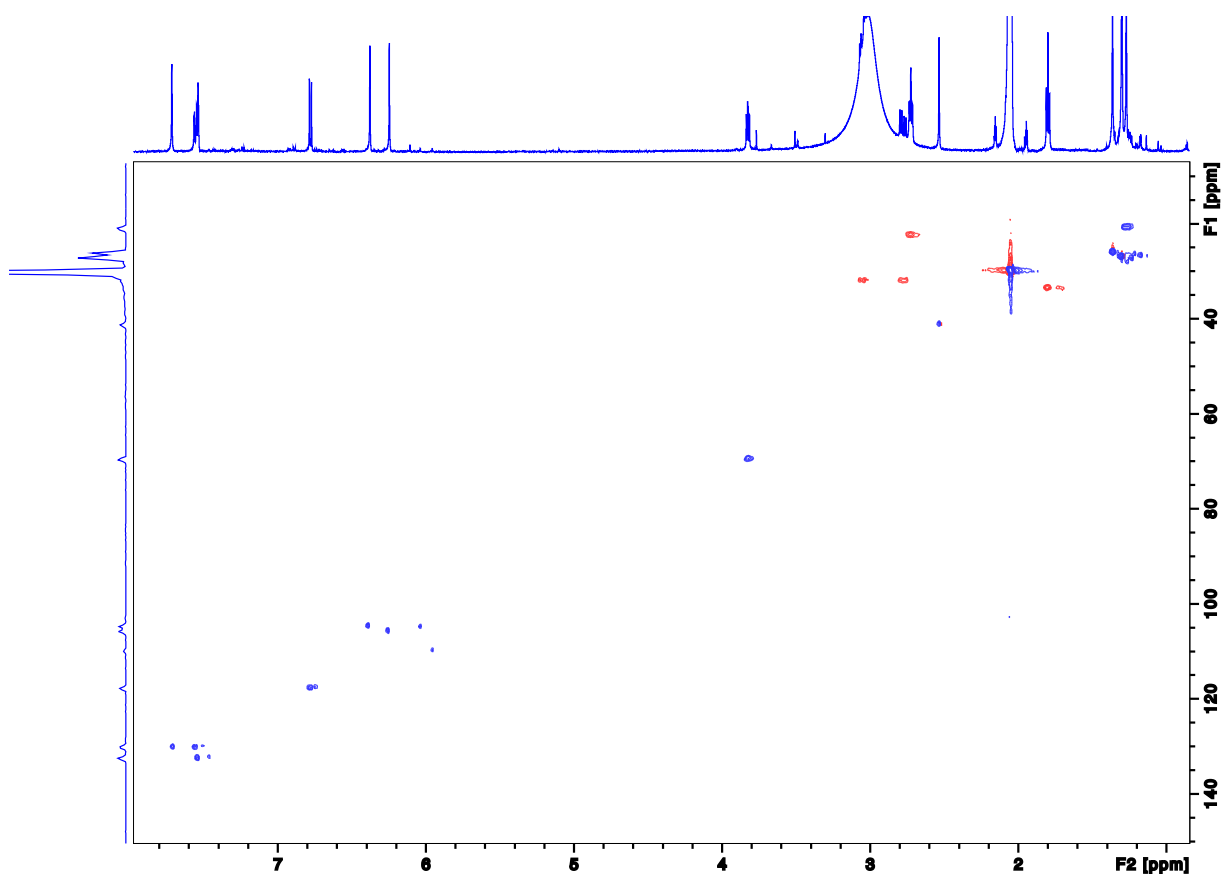

**Figure S49.** HSQC NMR (600 MHz, acetone- $d_6$ ) spectrum for aspulvinone N-CR (**15**).

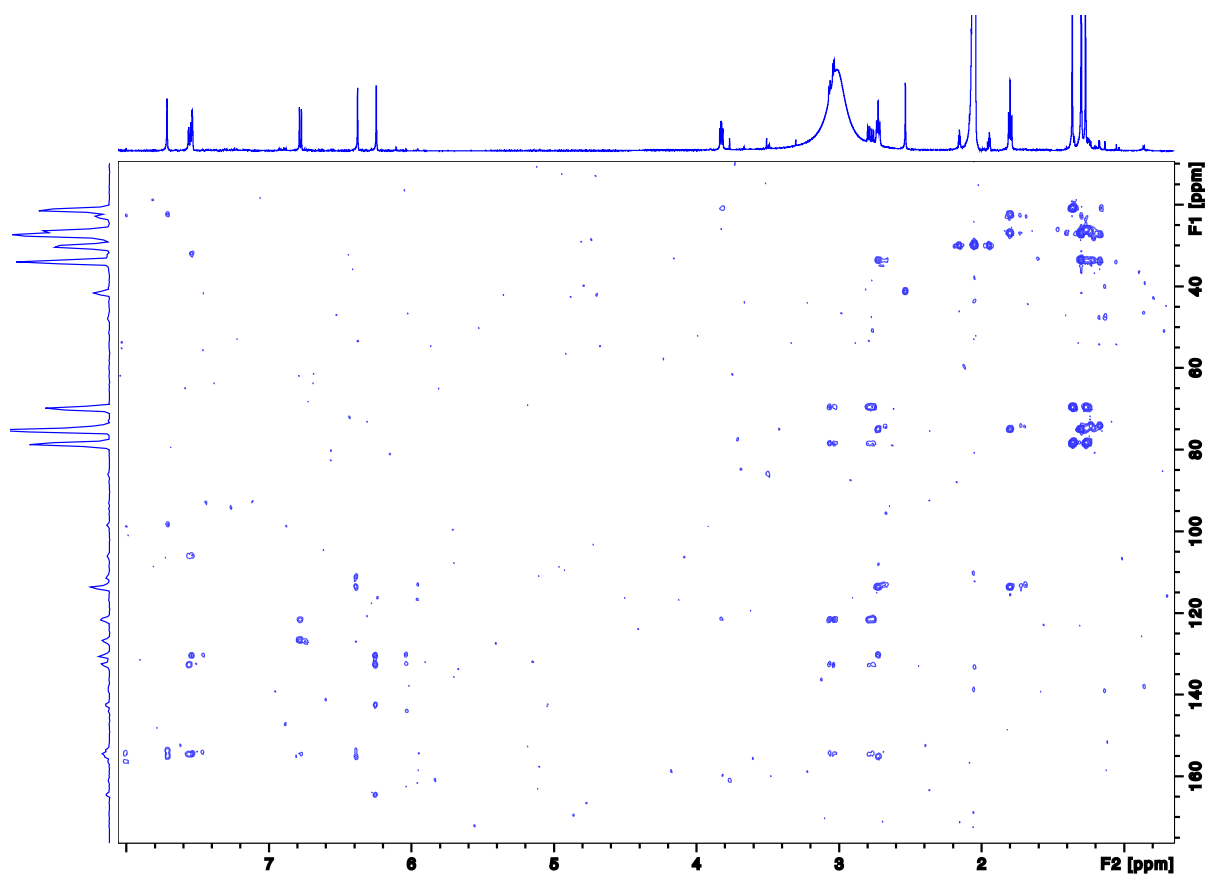

**Figure S50.** HMBC NMR (600 MHz, acetone- $d_6$ ) spectrum for aspulvinone N-CR (**15**).

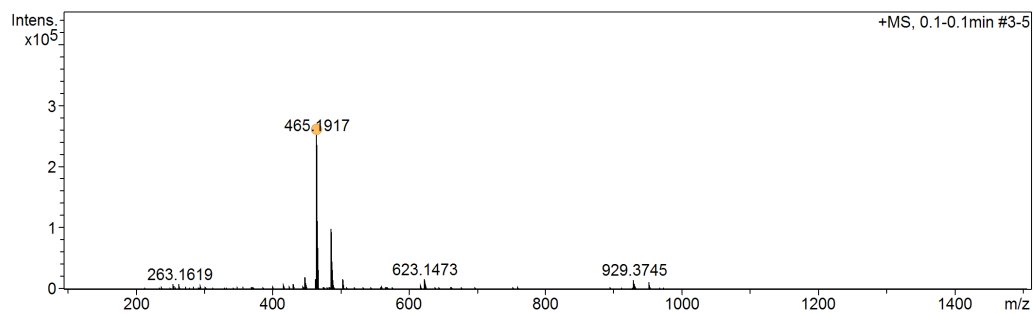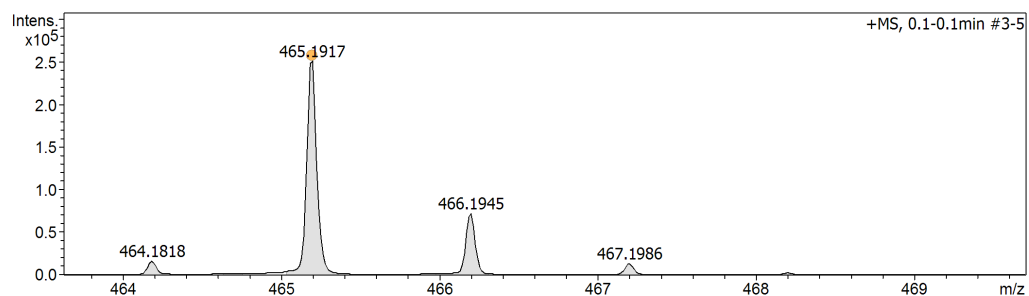

| Meas. m/z | # | Ion Formula | m/z      | err [ppm] | mSigma | # Sigma | Score  | rdb  | e <sup>-</sup> Conf | N-Rule |
|-----------|---|-------------|----------|-----------|--------|---------|--------|------|---------------------|--------|
| 465.1917  | 1 | C27H29O7    | 465.1908 | -2.0      | 5.4    | 1       | 95.26  | 13.5 | even                | ok     |
|           | 2 | C24H21N10O  | 465.1894 | -4.9      | 7.0    | 2       | 36.79  | 19.5 | even                | ok     |
|           | 3 | C23H25N6O5  | 465.1881 | -7.8      | 7.1    | 3       | 10.19  | 14.5 | even                | ok     |
|           | 4 | C28H25N4O3  | 465.1921 | -0.9      | 16.8   | 4       | 100.00 | 18.5 | even                | ok     |

**Figure S51.** HRMS spectrum and measurement for aspulvinone N-CR (**15**).

#### 4.10 Aspulvinone B (16)

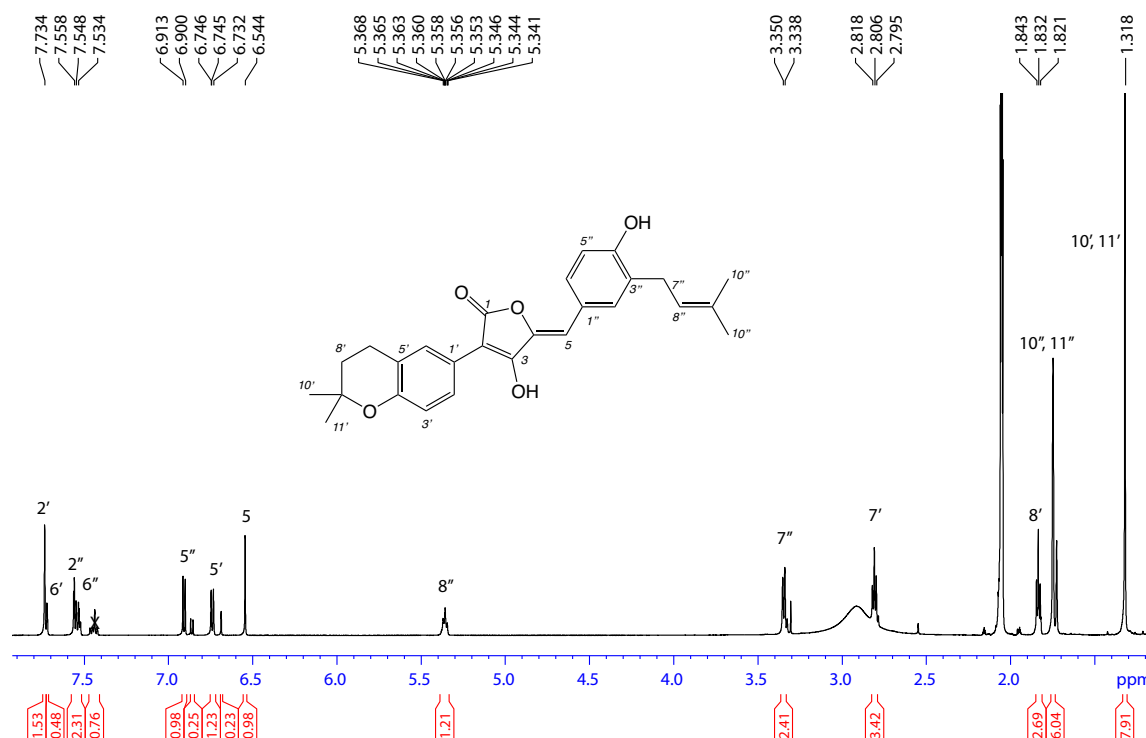

**Figure S52.**  $^1\text{H}$  NMR (600 MHz,  $\text{acetone-}d_6$ ) spectrum for aspulvinone B (16).

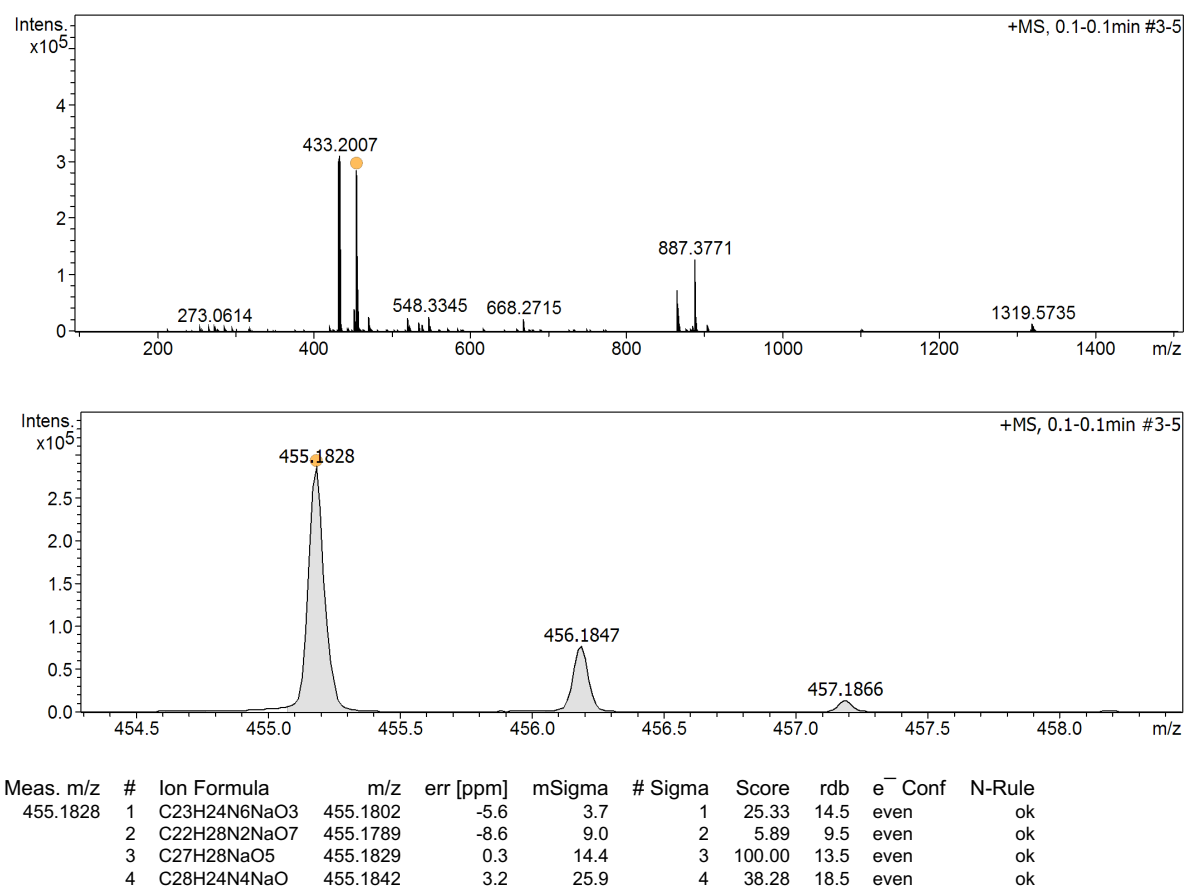

**Figure S53.** HRMS spectrum and measurement for aspulvinone B (16).

## 4.11 Aspulvinone D (17)

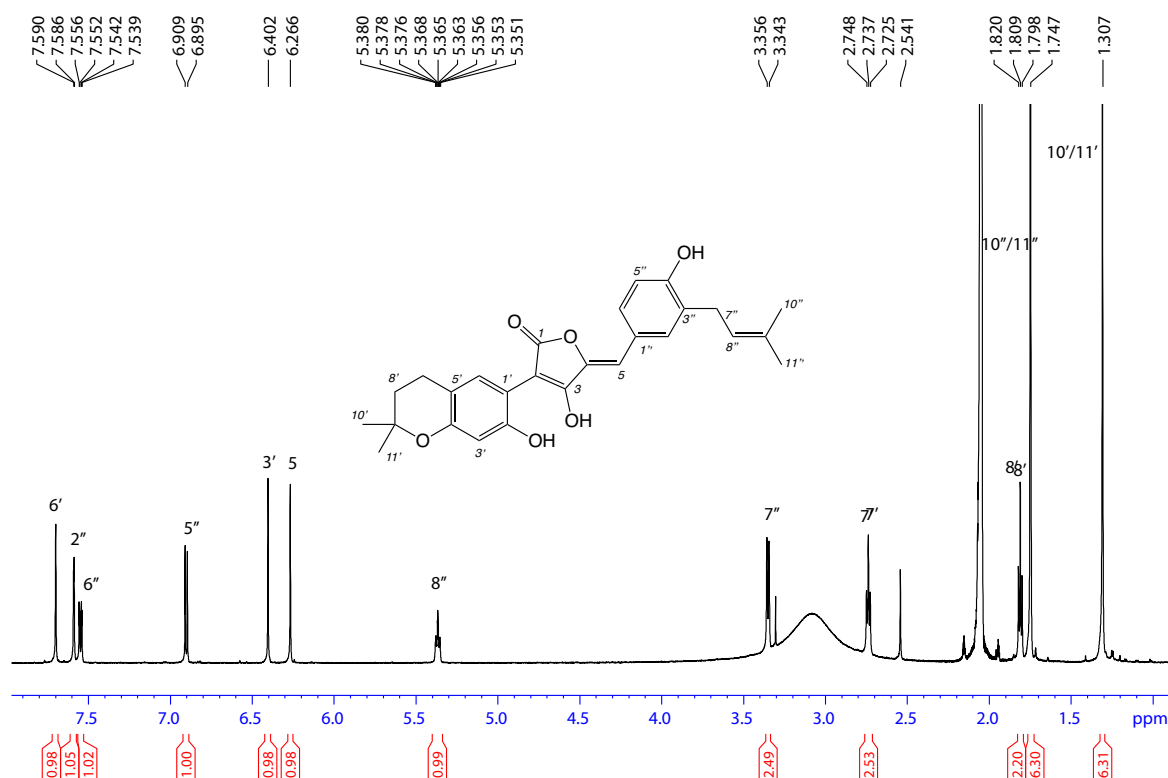

**Figure S54.** <sup>1</sup>H NMR (600 MHz, acetone-*d*<sub>6</sub>) spectrum for aspulvinone D (17).

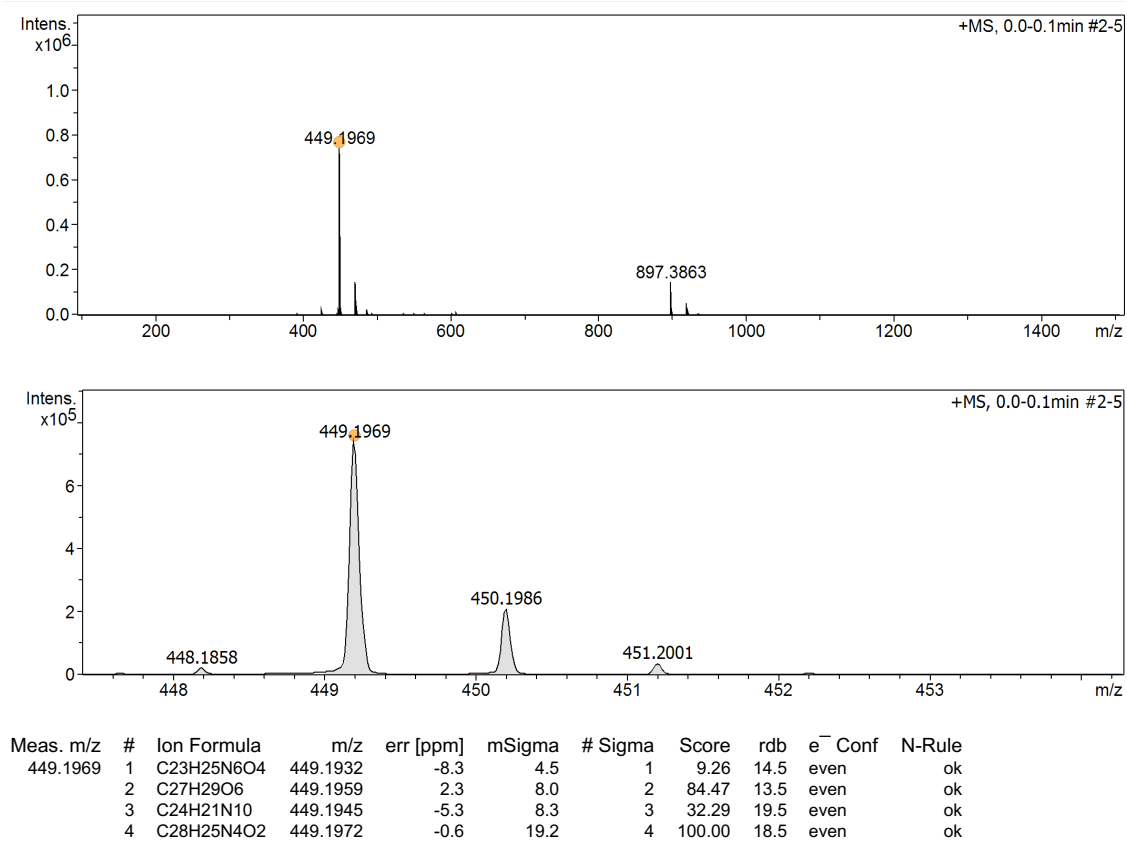

**Figure S55.** HRMS spectrum and measurement for aspulvinone D (17).

## 4.12 Aspulvinone H (18)

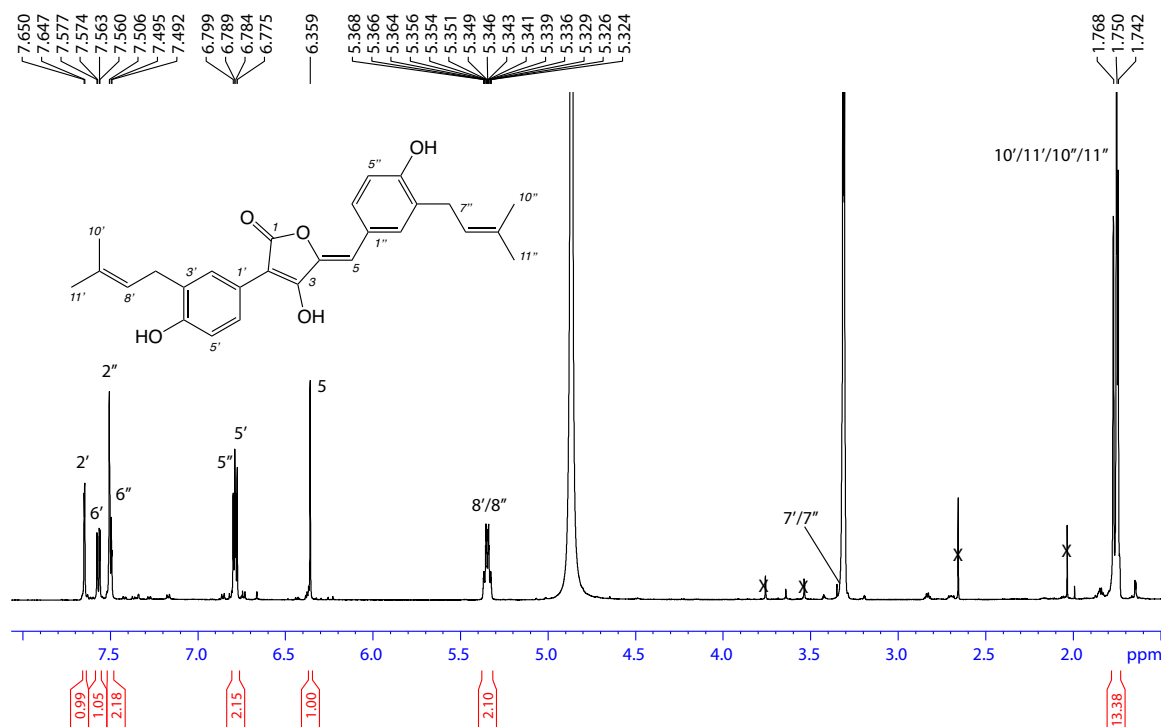

Figure S56.  $^1\text{H}$  NMR (600 MHz, methanol- $d_4$ ) spectrum for aspulvinone H (18).

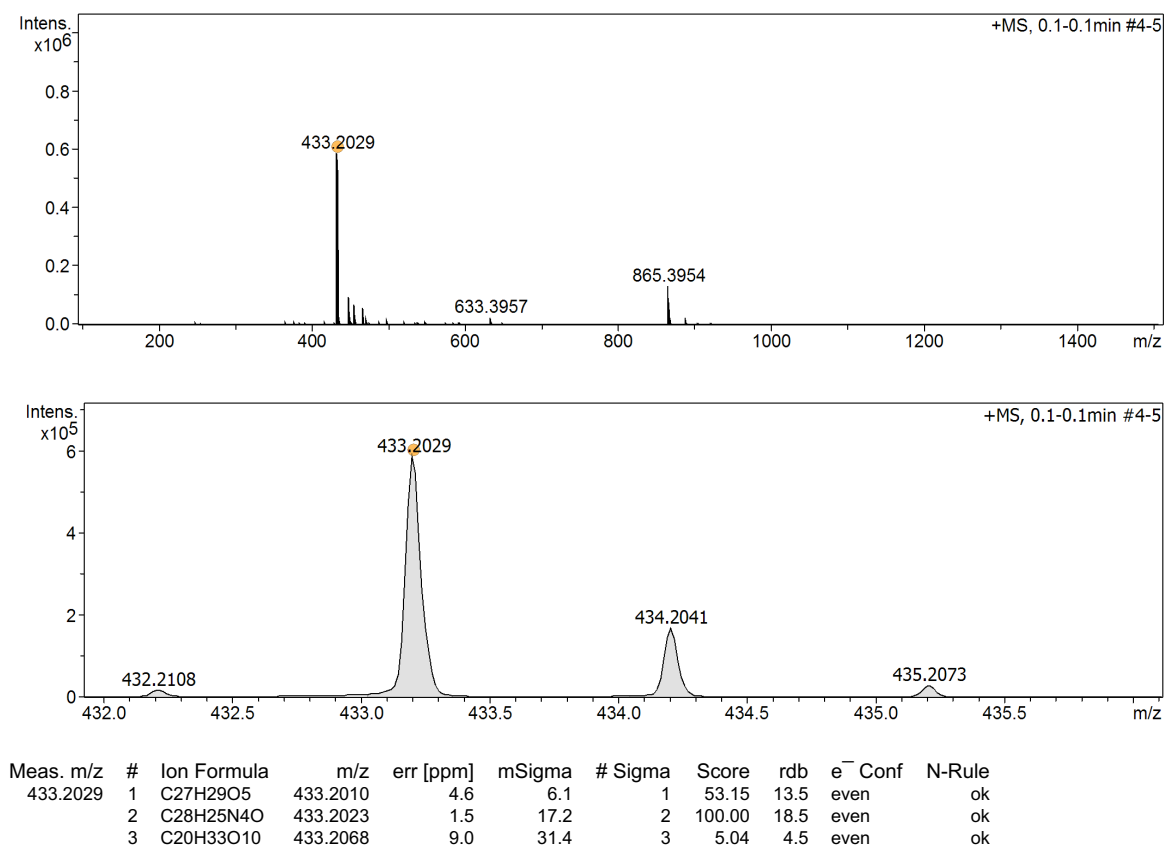

Figure S57. HRMS spectrum and measurement for aspulvinone H (18).

## 5. X-ray Crystallography of Aflaquinolone H (11)

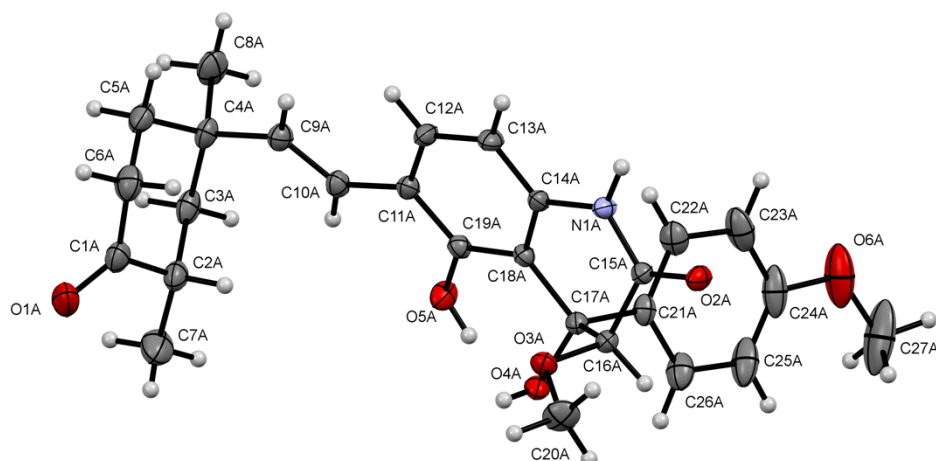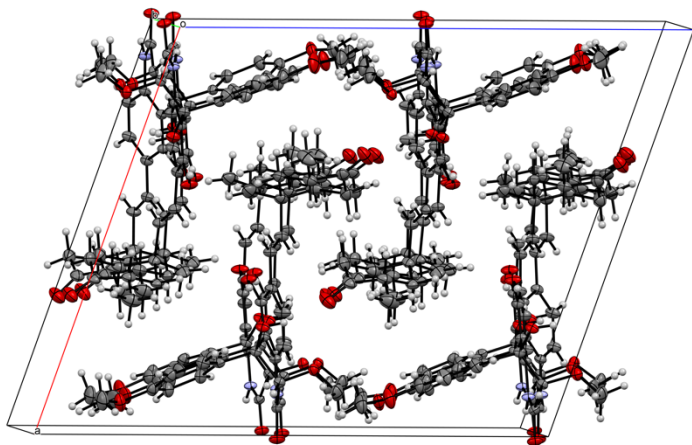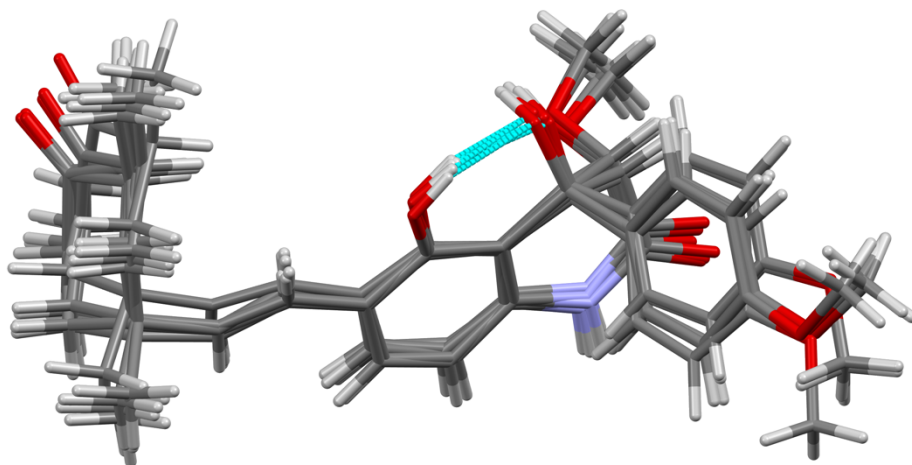

### Crystal data and structure refinement for 11.

|                     |                    |
|---------------------|--------------------|
| Identification code | shelx              |
| Empirical formula   | $C_{27}H_{31}NO_6$ |
| Formula weight      | 465.53             |
| Temperature         | 190(2) K           |
| Wavelength          | 1.54184 Å          |

|                                         |                                                                                              |                                                                          |
|-----------------------------------------|----------------------------------------------------------------------------------------------|--------------------------------------------------------------------------|
| Crystal system                          | Monoclinic                                                                                   |                                                                          |
| Space group                             | $P2_1$                                                                                       |                                                                          |
| Unit cell dimensions                    | $a = 16.8928(5) \text{ \AA}$<br>$b = 24.0733(7) \text{ \AA}$<br>$c = 20.0238(7) \text{ \AA}$ | $\alpha = 90^\circ$<br>$\beta = 109.271(3)^\circ$<br>$\gamma = 90^\circ$ |
| Volume                                  | $7686.7(4) \text{ \AA}^3$                                                                    |                                                                          |
| Z                                       | 12                                                                                           |                                                                          |
| Density (calculated)                    | $1.207 \text{ Mg/m}^3$                                                                       |                                                                          |
| Absorption coefficient                  | $0.694 \text{ mm}^{-1}$                                                                      |                                                                          |
| F(000)                                  | 2976                                                                                         |                                                                          |
| Crystal size                            | $0.150 \times 0.150 \times 0.050 \text{ mm}^3$                                               |                                                                          |
| Theta range for data collection         | $3.499$ to $62.201^\circ$                                                                    |                                                                          |
| Index ranges                            | $-19 \leq h \leq 19$ , $-27 \leq k \leq 24$ , $-22 \leq l \leq 22$                           |                                                                          |
| Reflections collected                   | 86232                                                                                        |                                                                          |
| Independent reflections                 | 22470 [ $R(\text{int}) = 0.0662$ ]                                                           |                                                                          |
| Completeness to $\theta = 62.201^\circ$ | 98.1 %                                                                                       |                                                                          |
| Absorption correction                   | Semi-empirical from equivalents                                                              |                                                                          |
| Max. and min. transmission              | 1 and 0.944                                                                                  |                                                                          |
| Refinement method                       | Full-matrix least-squares on $F^2$                                                           |                                                                          |
| Data / restraints / parameters          | 22470 / 1 / 1873                                                                             |                                                                          |
| Goodness-of-fit on $F^2$                | 0.949                                                                                        |                                                                          |
| Final R indices [ $I > 2\sigma(I)$ ]    | $R1 = 0.0425$ , $wR2 = 0.0790$                                                               |                                                                          |
| R indices (all data)                    | $R1 = 0.0632$ , $wR2 = 0.0868$                                                               |                                                                          |
| Absolute structure parameter            | -0.02(8)                                                                                     |                                                                          |
| Extinction coefficient                  | n/a                                                                                          |                                                                          |
| Largest diff. peak and hole             | $0.144$ and $-0.169 \text{ e.\AA}^{-3}$                                                      |                                                                          |

### Bond lengths [ $\text{\AA}$ ] and angles [ $^\circ$ ] for 11.

|               |          |                      |          |
|---------------|----------|----------------------|----------|
| C(1A)-O(1A)   | 1.218(5) | O(1B)-C(1B)-C(6B)    | 122.1(4) |
| C(1A)-C(6A)   | 1.501(7) | O(1B)-C(1B)-C(2B)    | 121.9(4) |
| C(1A)-C(2A)   | 1.512(6) | C(6B)-C(1B)-C(2B)    | 116.0(4) |
| C(2A)-C(7A)   | 1.519(7) | C(1B)-C(2B)-C(7B)    | 112.1(4) |
| C(2A)-C(3A)   | 1.540(7) | C(1B)-C(2B)-C(3B)    | 110.5(3) |
| C(3A)-C(4A)   | 1.535(6) | C(7B)-C(2B)-C(3B)    | 113.3(4) |
| C(4A)-C(9A)   | 1.514(6) | C(4B)-C(3B)-C(2B)    | 114.4(3) |
| C(4A)-C(5A)   | 1.533(6) | C(3B)-C(4B)-C(9B)    | 112.5(3) |
| C(4A)-C(8A)   | 1.535(6) | C(3B)-C(4B)-C(5B)    | 108.0(3) |
| C(5A)-C(6A)   | 1.527(7) | C(9B)-C(4B)-C(5B)    | 108.9(3) |
| C(9A)-C(10A)  | 1.327(6) | C(3B)-C(4B)-C(8B)    | 110.3(4) |
| C(10A)-C(11A) | 1.472(6) | C(9B)-C(4B)-C(8B)    | 108.2(3) |
| C(11A)-C(12A) | 1.389(6) | C(5B)-C(4B)-C(8B)    | 108.8(4) |
| C(11A)-C(19A) | 1.402(5) | C(6B)-C(5B)-C(4B)    | 112.7(3) |
| C(12A)-C(13A) | 1.378(6) | C(1B)-C(6B)-C(5B)    | 112.0(4) |
| C(13A)-C(14A) | 1.382(5) | C(10B)-C(9B)-C(4B)   | 127.7(4) |
| C(14A)-C(18A) | 1.395(5) | C(9B)-C(10B)-C(11B)  | 125.5(4) |
| C(14A)-N(1A)  | 1.421(5) | C(12B)-C(11B)-C(19B) | 117.5(3) |
| C(15A)-O(2A)  | 1.236(4) | C(12B)-C(11B)-C(10B) | 122.3(3) |
| C(15A)-N(1A)  | 1.344(5) | C(19B)-C(11B)-C(10B) | 120.2(3) |
| C(15A)-C(16A) | 1.513(5) | C(13B)-C(12B)-C(11B) | 122.0(3) |
| C(16A)-O(3A)  | 1.419(4) | C(14B)-C(13B)-C(12B) | 119.1(3) |
| C(16A)-C(17A) | 1.536(5) | C(13B)-C(14B)-C(18B) | 121.5(3) |
| C(17A)-O(4A)  | 1.424(4) | C(13B)-C(14B)-N(1B)  | 119.5(3) |
| C(17A)-C(18A) | 1.521(5) | C(18B)-C(14B)-N(1B)  | 119.0(3) |
| C(17A)-C(21A) | 1.527(5) | O(2B)-C(15B)-N(1B)   | 122.6(3) |
| C(18A)-C(19A) | 1.396(5) | O(2B)-C(15B)-C(16B)  | 121.3(3) |
| C(19A)-O(5A)  | 1.367(5) | N(1B)-C(15B)-C(16B)  | 115.9(3) |
| C(20A)-O(3A)  | 1.420(5) | O(3B)-C(16B)-C(15B)  | 107.2(3) |
| C(21A)-C(26A) | 1.383(6) | O(3B)-C(16B)-C(17B)  | 108.2(3) |
| C(21A)-C(22A) | 1.388(6) | C(15B)-C(16B)-C(17B) | 112.3(3) |
| C(22A)-C(23A) | 1.394(7) | O(4B)-C(17B)-C(18B)  | 110.9(3) |
| C(23A)-C(24A) | 1.374(9) | O(4B)-C(17B)-C(21B)  | 107.1(3) |

|               |           |                      |          |
|---------------|-----------|----------------------|----------|
| C(24A)-C(25A) | 1.369(9)  | C(18B)-C(17B)-C(21B) | 114.2(3) |
| C(24A)-O(6A)  | 1.382(6)  | O(4B)-C(17B)-C(16B)  | 107.6(3) |
| C(25A)-C(26A) | 1.393(7)  | C(18B)-C(17B)-C(16B) | 109.2(3) |
| C(27A)-O(6A)  | 1.399(10) | C(21B)-C(17B)-C(16B) | 107.6(3) |
| C(1B)-O(1B)   | 1.226(5)  | C(14B)-C(18B)-C(19B) | 118.1(3) |
| C(1B)-C(6B)   | 1.496(7)  | C(14B)-C(18B)-C(17B) | 119.1(3) |
| C(1B)-C(2B)   | 1.508(6)  | C(19B)-C(18B)-C(17B) | 122.8(3) |
| C(2B)-C(7B)   | 1.522(6)  | O(5B)-C(19B)-C(18B)  | 121.9(3) |
| C(2B)-C(3B)   | 1.531(6)  | O(5B)-C(19B)-C(11B)  | 116.4(3) |
| C(3B)-C(4B)   | 1.522(6)  | C(18B)-C(19B)-C(11B) | 121.7(3) |
| C(4B)-C(9B)   | 1.521(5)  | C(26B)-C(21B)-C(22B) | 118.3(4) |
| C(4B)-C(5B)   | 1.534(6)  | C(26B)-C(21B)-C(17B) | 122.2(3) |
| C(4B)-C(8B)   | 1.537(6)  | C(22B)-C(21B)-C(17B) | 119.3(3) |
| C(5B)-C(6B)   | 1.522(7)  | C(23B)-C(22B)-C(21B) | 119.9(4) |
| C(9B)-C(10B)  | 1.323(5)  | C(22B)-C(23B)-C(24B) | 121.5(4) |
| C(10B)-C(11B) | 1.473(5)  | O(6B)-C(24B)-C(25B)  | 124.3(4) |
| C(11B)-C(12B) | 1.395(5)  | O(6B)-C(24B)-C(23B)  | 116.3(4) |
| C(11B)-C(19B) | 1.402(5)  | C(25B)-C(24B)-C(23B) | 119.4(4) |
| C(12B)-C(13B) | 1.383(5)  | C(24B)-C(25B)-C(26B) | 119.6(4) |
| C(13B)-C(14B) | 1.379(5)  | C(21B)-C(26B)-C(25B) | 121.1(4) |
| C(14B)-C(18B) | 1.397(5)  | C(15B)-N(1B)-C(14B)  | 124.3(3) |
| C(14B)-N(1B)  | 1.422(5)  | C(20B)-O(3B)-C(16B)  | 113.8(3) |
| C(15B)-O(2B)  | 1.236(4)  | C(24B)-O(6B)-C(27B)  | 118.6(4) |
| C(15B)-N(1B)  | 1.340(5)  | O(1C)-C(1C)-C(6C)    | 122.8(4) |
| C(15B)-C(16B) | 1.521(5)  | O(1C)-C(1C)-C(2C)    | 121.0(4) |
| C(16B)-O(3B)  | 1.426(4)  | C(6C)-C(1C)-C(2C)    | 116.2(4) |
| C(16B)-C(17B) | 1.528(5)  | C(1C)-C(2C)-C(7C)    | 113.0(4) |
| C(17B)-O(4B)  | 1.433(4)  | C(1C)-C(2C)-C(3C)    | 110.4(4) |
| C(17B)-C(18B) | 1.521(5)  | C(7C)-C(2C)-C(3C)    | 112.8(4) |
| C(17B)-C(21B) | 1.526(5)  | C(4C)-C(3C)-C(2C)    | 113.8(3) |
| C(18B)-C(19B) | 1.399(5)  | C(9C)-C(4C)-C(3C)    | 112.7(3) |
| C(19B)-O(5B)  | 1.365(4)  | C(9C)-C(4C)-C(5C)    | 109.6(3) |
| C(20B)-O(3B)  | 1.428(5)  | C(3C)-C(4C)-C(5C)    | 107.9(3) |
| C(21B)-C(26B) | 1.385(6)  | C(9C)-C(4C)-C(8C)    | 107.9(3) |
| C(21B)-C(22B) | 1.395(6)  | C(3C)-C(4C)-C(8C)    | 109.5(4) |
| C(22B)-C(23B) | 1.373(6)  | C(5C)-C(4C)-C(8C)    | 109.2(4) |
| C(23B)-C(24B) | 1.376(7)  | C(6C)-C(5C)-C(4C)    | 112.3(3) |
| C(24B)-O(6B)  | 1.372(5)  | C(1C)-C(6C)-C(5C)    | 111.4(4) |
| C(24B)-C(25B) | 1.371(6)  | C(10C)-C(9C)-C(4C)   | 127.9(4) |
| C(25B)-C(26B) | 1.396(6)  | C(9C)-C(10C)-C(11C)  | 126.0(4) |
| C(27B)-O(6B)  | 1.422(7)  | C(12C)-C(11C)-C(19C) | 117.5(3) |
| C(1C)-O(1C)   | 1.221(5)  | C(12C)-C(11C)-C(10C) | 122.2(4) |
| C(1C)-C(6C)   | 1.490(7)  | C(19C)-C(11C)-C(10C) | 120.3(3) |
| C(1C)-C(2C)   | 1.503(6)  | C(13C)-C(12C)-C(11C) | 122.3(4) |
| C(2C)-C(7C)   | 1.519(7)  | C(12C)-C(13C)-C(14C) | 119.3(4) |
| C(2C)-C(3C)   | 1.536(6)  | C(13C)-C(14C)-C(18C) | 121.1(3) |
| C(3C)-C(4C)   | 1.528(6)  | C(13C)-C(14C)-N(1C)  | 119.6(3) |
| C(4C)-C(9C)   | 1.509(6)  | C(18C)-C(14C)-N(1C)  | 119.3(3) |
| C(4C)-C(5C)   | 1.535(6)  | O(5C)-C(15C)-N(1C)   | 122.8(3) |
| C(4C)-C(8C)   | 1.540(6)  | O(5C)-C(15C)-C(16C)  | 122.1(3) |
| C(5C)-C(6C)   | 1.527(7)  | N(1C)-C(15C)-C(16C)  | 115.0(3) |
| C(9C)-C(10C)  | 1.323(5)  | O(4C)-C(16C)-C(15C)  | 107.9(3) |
| C(10C)-C(11C) | 1.468(5)  | O(4C)-C(16C)-C(17C)  | 107.1(3) |
| C(11C)-C(12C) | 1.387(6)  | C(15C)-C(16C)-C(17C) | 111.6(3) |
| C(11C)-C(19C) | 1.403(5)  | O(3C)-C(17C)-C(21C)  | 107.8(3) |
| C(12C)-C(13C) | 1.377(6)  | O(3C)-C(17C)-C(18C)  | 110.9(3) |
| C(13C)-C(14C) | 1.381(5)  | C(21C)-C(17C)-C(18C) | 113.5(3) |
| C(14C)-C(18C) | 1.399(5)  | O(3C)-C(17C)-C(16C)  | 107.8(3) |
| C(14C)-N(1C)  | 1.414(5)  | C(21C)-C(17C)-C(16C) | 108.4(3) |
| C(15C)-O(5C)  | 1.237(4)  | C(18C)-C(17C)-C(16C) | 108.2(3) |
| C(15C)-N(1C)  | 1.339(5)  | C(14C)-C(18C)-C(19C) | 118.1(3) |
| C(15C)-C(16C) | 1.511(5)  | C(14C)-C(18C)-C(17C) | 118.8(3) |
| C(16C)-O(4C)  | 1.429(4)  | C(19C)-C(18C)-C(17C) | 123.1(3) |

|               |          |                      |          |
|---------------|----------|----------------------|----------|
| C(16C)-C(17C) | 1.540(5) | O(2C)-C(19C)-C(18C)  | 121.4(3) |
| C(17C)-O(3C)  | 1.430(4) | O(2C)-C(19C)-C(11C)  | 117.0(3) |
| C(17C)-C(21C) | 1.519(5) | C(18C)-C(19C)-C(11C) | 121.6(3) |
| C(17C)-C(18C) | 1.520(5) | C(22C)-C(21C)-C(26C) | 117.8(3) |
| C(18C)-C(19C) | 1.400(5) | C(22C)-C(21C)-C(17C) | 120.6(3) |
| C(19C)-O(2C)  | 1.365(4) | C(26C)-C(21C)-C(17C) | 121.5(3) |
| C(20C)-O(4C)  | 1.424(5) | C(21C)-C(22C)-C(23C) | 121.5(4) |
| C(21C)-C(22C) | 1.384(5) | C(24C)-C(23C)-C(22C) | 119.4(4) |
| C(21C)-C(26C) | 1.389(6) | O(6C)-C(24C)-C(25C)  | 115.8(4) |
| C(22C)-C(23C) | 1.398(6) | O(6C)-C(24C)-C(23C)  | 124.6(4) |
| C(23C)-C(24C) | 1.382(6) | C(25C)-C(24C)-C(23C) | 119.6(4) |
| C(24C)-O(6C)  | 1.369(5) | C(26C)-C(25C)-C(24C) | 120.3(4) |
| C(24C)-C(25C) | 1.385(6) | C(25C)-C(26C)-C(21C) | 121.3(4) |
| C(25C)-C(26C) | 1.378(6) | C(15C)-N(1C)-C(14C)  | 124.0(3) |
| C(27C)-O(6C)  | 1.428(6) | C(20C)-O(4C)-C(16C)  | 113.5(3) |
| C(1D)-O(1D)   | 1.217(5) | C(24C)-O(6C)-C(27C)  | 117.8(4) |
| C(1D)-C(6D)   | 1.497(7) | O(1D)-C(1D)-C(6D)    | 122.3(4) |
| C(1D)-C(2D)   | 1.509(6) | O(1D)-C(1D)-C(2D)    | 121.6(4) |
| C(2D)-C(7D)   | 1.510(7) | C(6D)-C(1D)-C(2D)    | 116.1(4) |
| C(2D)-C(3D)   | 1.532(6) | C(7D)-C(2D)-C(1D)    | 113.0(4) |
| C(3D)-C(4D)   | 1.531(6) | C(7D)-C(2D)-C(3D)    | 113.7(4) |
| C(4D)-C(9D)   | 1.516(5) | C(1D)-C(2D)-C(3D)    | 109.7(3) |
| C(4D)-C(5D)   | 1.536(6) | C(4D)-C(3D)-C(2D)    | 114.1(3) |
| C(4D)-C(8D)   | 1.535(6) | C(9D)-C(4D)-C(3D)    | 111.8(3) |
| C(5D)-C(6D)   | 1.525(6) | C(9D)-C(4D)-C(5D)    | 109.3(3) |
| C(9D)-C(10D)  | 1.326(5) | C(3D)-C(4D)-C(5D)    | 107.5(3) |
| C(10D)-C(11D) | 1.466(5) | C(9D)-C(4D)-C(8D)    | 109.0(3) |
| C(11D)-C(12D) | 1.389(5) | C(3D)-C(4D)-C(8D)    | 110.5(3) |
| C(11D)-C(19D) | 1.401(5) | C(5D)-C(4D)-C(8D)    | 108.7(3) |
| C(12D)-C(13D) | 1.378(6) | C(6D)-C(5D)-C(4D)    | 112.8(3) |
| C(13D)-C(14D) | 1.383(5) | C(1D)-C(6D)-C(5D)    | 111.5(4) |
| C(14D)-C(18D) | 1.396(5) | C(10D)-C(9D)-C(4D)   | 127.5(4) |
| C(14D)-N(1D)  | 1.415(5) | C(9D)-C(10D)-C(11D)  | 125.8(4) |
| C(15D)-O(2D)  | 1.228(4) | C(12D)-C(11D)-C(19D) | 117.0(3) |
| C(15D)-N(1D)  | 1.345(5) | C(12D)-C(11D)-C(10D) | 122.6(3) |
| C(15D)-C(16D) | 1.518(5) | C(19D)-C(11D)-C(10D) | 120.4(3) |
| C(16D)-O(3D)  | 1.423(4) | C(13D)-C(12D)-C(11D) | 122.6(4) |
| C(16D)-C(17D) | 1.534(5) | C(12D)-C(13D)-C(14D) | 119.0(3) |
| C(17D)-O(4D)  | 1.431(4) | C(13D)-C(14D)-C(18D) | 121.1(3) |
| C(17D)-C(18D) | 1.520(5) | C(13D)-C(14D)-N(1D)  | 119.1(3) |
| C(17D)-C(21D) | 1.524(5) | C(18D)-C(14D)-N(1D)  | 119.7(3) |
| C(18D)-C(19D) | 1.395(5) | O(2D)-C(15D)-N(1D)   | 122.8(3) |
| C(19D)-O(6D)  | 1.365(4) | O(2D)-C(15D)-C(16D)  | 122.1(3) |
| C(20D)-O(3D)  | 1.418(5) | N(1D)-C(15D)-C(16D)  | 114.9(3) |
| C(21D)-C(26D) | 1.382(5) | O(3D)-C(16D)-C(15D)  | 107.7(3) |
| C(21D)-C(22D) | 1.392(6) | O(3D)-C(16D)-C(17D)  | 108.5(3) |
| C(22D)-C(23D) | 1.379(6) | C(15D)-C(16D)-C(17D) | 112.3(3) |
| C(23D)-C(24D) | 1.386(6) | O(4D)-C(17D)-C(18D)  | 111.4(3) |
| C(24D)-C(25D) | 1.373(6) | O(4D)-C(17D)-C(21D)  | 107.2(3) |
| C(24D)-O(5D)  | 1.375(5) | C(18D)-C(17D)-C(21D) | 113.5(3) |
| C(25D)-C(26D) | 1.388(6) | O(4D)-C(17D)-C(16D)  | 107.7(3) |
| C(27D)-O(5D)  | 1.422(6) | C(18D)-C(17D)-C(16D) | 108.8(3) |
| C(1E)-O(1E)   | 1.225(6) | C(21D)-C(17D)-C(16D) | 108.0(3) |
| C(1E)-C(6E)   | 1.496(7) | C(14D)-C(18D)-C(19D) | 118.2(3) |
| C(1E)-C(2E)   | 1.509(6) | C(14D)-C(18D)-C(17D) | 118.7(3) |
| C(2E)-C(7E)   | 1.514(7) | C(19D)-C(18D)-C(17D) | 123.1(3) |
| C(2E)-C(3E)   | 1.535(6) | O(6D)-C(19D)-C(18D)  | 121.5(3) |
| C(3E)-C(4E)   | 1.533(7) | O(6D)-C(19D)-C(11D)  | 116.5(3) |
| C(4E)-C(9E)   | 1.517(6) | C(18D)-C(19D)-C(11D) | 122.0(3) |
| C(4E)-C(8E)   | 1.522(6) | C(26D)-C(21D)-C(22D) | 117.9(3) |
| C(4E)-C(5E)   | 1.548(6) | C(26D)-C(21D)-C(17D) | 122.6(3) |
| C(5E)-C(6E)   | 1.518(7) | C(22D)-C(21D)-C(17D) | 119.4(3) |
| C(9E)-C(10E)  | 1.318(6) | C(23D)-C(22D)-C(21D) | 120.6(4) |

|               |          |                      |          |
|---------------|----------|----------------------|----------|
| C(10E)-C(11E) | 1.471(6) | C(22D)-C(23D)-C(24D) | 120.5(4) |
| C(11E)-C(12E) | 1.394(6) | C(25D)-C(24D)-O(5D)  | 124.8(4) |
| C(11E)-C(19E) | 1.406(5) | C(25D)-C(24D)-C(23D) | 119.9(4) |
| C(12E)-C(13E) | 1.375(6) | O(5D)-C(24D)-C(23D)  | 115.3(4) |
| C(13E)-C(14E) | 1.393(5) | C(24D)-C(25D)-C(26D) | 119.1(4) |
| C(14E)-C(18E) | 1.386(5) | C(21D)-C(26D)-C(25D) | 122.1(4) |
| C(14E)-N(1E)  | 1.421(5) | C(15D)-N(1D)-C(14D)  | 124.3(3) |
| C(15E)-O(5E)  | 1.232(4) | C(20D)-O(3D)-C(16D)  | 114.4(3) |
| C(15E)-N(1E)  | 1.342(5) | C(24D)-O(5D)-C(27D)  | 118.0(4) |
| C(15E)-C(16E) | 1.521(5) | O(1E)-C(1E)-C(6E)    | 123.1(4) |
| C(16E)-O(4E)  | 1.423(4) | O(1E)-C(1E)-C(2E)    | 120.8(4) |
| C(16E)-C(17E) | 1.535(5) | C(6E)-C(1E)-C(2E)    | 116.1(4) |
| C(17E)-O(3E)  | 1.437(4) | C(1E)-C(2E)-C(7E)    | 112.9(4) |
| C(17E)-C(21E) | 1.513(5) | C(1E)-C(2E)-C(3E)    | 109.6(4) |
| C(17E)-C(18E) | 1.523(5) | C(7E)-C(2E)-C(3E)    | 113.5(4) |
| C(18E)-C(19E) | 1.397(5) | C(2E)-C(3E)-C(4E)    | 114.8(3) |
| C(19E)-O(2E)  | 1.365(4) | C(9E)-C(4E)-C(8E)    | 108.7(4) |
| C(20E)-O(4E)  | 1.421(5) | C(9E)-C(4E)-C(3E)    | 112.2(3) |
| C(21E)-C(26E) | 1.383(5) | C(8E)-C(4E)-C(3E)    | 109.9(4) |
| C(21E)-C(22E) | 1.392(6) | C(9E)-C(4E)-C(5E)    | 109.1(4) |
| C(22E)-C(23E) | 1.382(6) | C(8E)-C(4E)-C(5E)    | 109.6(4) |
| C(23E)-C(24E) | 1.381(6) | C(3E)-C(4E)-C(5E)    | 107.3(4) |
| C(24E)-O(6E)  | 1.370(5) | C(6E)-C(5E)-C(4E)    | 112.7(4) |
| C(24E)-C(25E) | 1.374(6) | C(1E)-C(6E)-C(5E)    | 112.1(4) |
| C(25E)-C(26E) | 1.399(6) | C(10E)-C(9E)-C(4E)   | 127.2(4) |
| C(27E)-O(6E)  | 1.430(6) | C(9E)-C(10E)-C(11E)  | 126.6(4) |
| C(1F)-O(1F)   | 1.224(5) | C(12E)-C(11E)-C(19E) | 117.5(3) |
| C(1F)-C(2F)   | 1.500(6) | C(12E)-C(11E)-C(10E) | 122.7(4) |
| C(1F)-C(6F)   | 1.499(7) | C(19E)-C(11E)-C(10E) | 119.8(3) |
| C(2F)-C(7F)   | 1.514(6) | C(13E)-C(12E)-C(11E) | 122.2(4) |
| C(2F)-C(3F)   | 1.533(6) | C(12E)-C(13E)-C(14E) | 119.0(4) |
| C(3F)-C(4F)   | 1.539(6) | C(18E)-C(14E)-C(13E) | 121.2(3) |
| C(4F)-C(9F)   | 1.514(6) | C(18E)-C(14E)-N(1E)  | 119.6(3) |
| C(4F)-C(5F)   | 1.532(6) | C(13E)-C(14E)-N(1E)  | 119.2(3) |
| C(4F)-C(8F)   | 1.543(6) | O(5E)-C(15E)-N(1E)   | 123.0(3) |
| C(5F)-C(6F)   | 1.522(6) | O(5E)-C(15E)-C(16E)  | 122.5(3) |
| C(9F)-C(10F)  | 1.329(6) | N(1E)-C(15E)-C(16E)  | 114.4(3) |
| C(10F)-C(11F) | 1.473(5) | O(4E)-C(16E)-C(15E)  | 108.0(3) |
| C(11F)-C(12F) | 1.386(5) | O(4E)-C(16E)-C(17E)  | 106.8(3) |
| C(11F)-C(19F) | 1.406(5) | C(15E)-C(16E)-C(17E) | 111.7(3) |
| C(12F)-C(13F) | 1.386(5) | O(3E)-C(17E)-C(21E)  | 107.7(3) |
| C(13F)-C(14F) | 1.381(5) | O(3E)-C(17E)-C(18E)  | 110.4(3) |
| C(14F)-C(18F) | 1.386(5) | C(21E)-C(17E)-C(18E) | 114.1(3) |
| C(14F)-N(1F)  | 1.420(5) | O(3E)-C(17E)-C(16E)  | 107.4(3) |
| C(15F)-O(5F)  | 1.237(4) | C(21E)-C(17E)-C(16E) | 108.8(3) |
| C(15F)-N(1F)  | 1.341(5) | C(18E)-C(17E)-C(16E) | 108.3(3) |
| C(15F)-C(16F) | 1.514(5) | C(14E)-C(18E)-C(19E) | 118.5(3) |
| C(16F)-O(4F)  | 1.427(4) | C(14E)-C(18E)-C(17E) | 118.6(3) |
| C(16F)-C(17F) | 1.536(5) | C(19E)-C(18E)-C(17E) | 122.8(3) |
| C(17F)-O(3F)  | 1.431(4) | O(2E)-C(19E)-C(18E)  | 121.7(3) |
| C(17F)-C(21F) | 1.515(5) | O(2E)-C(19E)-C(11E)  | 116.8(3) |
| C(17F)-C(18F) | 1.521(5) | C(18E)-C(19E)-C(11E) | 121.5(3) |
| C(18F)-C(19F) | 1.408(5) | C(26E)-C(21E)-C(22E) | 118.0(3) |
| C(19F)-O(2F)  | 1.362(4) | C(26E)-C(21E)-C(17E) | 120.2(3) |
| C(20F)-O(4F)  | 1.425(5) | C(22E)-C(21E)-C(17E) | 121.7(3) |
| C(21F)-C(26F) | 1.383(6) | C(23E)-C(22E)-C(21E) | 121.3(4) |
| C(21F)-C(22F) | 1.393(6) | C(22E)-C(23E)-C(24E) | 119.8(4) |
| C(22F)-C(23F) | 1.371(6) | O(6E)-C(24E)-C(25E)  | 124.4(4) |
| C(23F)-C(24F) | 1.379(7) | O(6E)-C(24E)-C(23E)  | 115.3(4) |
| C(24F)-O(6F)  | 1.375(5) | C(25E)-C(24E)-C(23E) | 120.3(4) |
| C(24F)-C(25F) | 1.382(7) | C(24E)-C(25E)-C(26E) | 119.5(4) |
| C(25F)-C(26F) | 1.394(6) | C(21E)-C(26E)-C(25E) | 121.2(4) |
| C(27F)-O(6F)  | 1.420(7) | C(15E)-N(1E)-C(14E)  | 123.6(3) |

|                      |          |                      |          |
|----------------------|----------|----------------------|----------|
|                      |          | C(20E)-O(4E)-C(16E)  | 114.0(3) |
|                      |          | C(24E)-O(6E)-C(27E)  | 117.5(4) |
| O(1A)-C(1A)-C(6A)    | 122.7(4) | O(1F)-C(1F)-C(2F)    | 121.8(4) |
| O(1A)-C(1A)-C(2A)    | 121.3(4) | O(1F)-C(1F)-C(6F)    | 122.1(4) |
| C(6A)-C(1A)-C(2A)    | 116.0(4) | C(2F)-C(1F)-C(6F)    | 116.1(4) |
| C(1A)-C(2A)-C(7A)    | 113.0(4) | C(1F)-C(2F)-C(7F)    | 112.8(4) |
| C(1A)-C(2A)-C(3A)    | 109.9(4) | C(1F)-C(2F)-C(3F)    | 110.8(3) |
| C(7A)-C(2A)-C(3A)    | 112.4(4) | C(7F)-C(2F)-C(3F)    | 113.0(4) |
| C(4A)-C(3A)-C(2A)    | 114.3(3) | C(2F)-C(3F)-C(4F)    | 114.5(3) |
| C(9A)-C(4A)-C(5A)    | 109.1(3) | C(9F)-C(4F)-C(5F)    | 109.1(3) |
| C(9A)-C(4A)-C(3A)    | 112.5(3) | C(9F)-C(4F)-C(3F)    | 112.6(3) |
| C(5A)-C(4A)-C(3A)    | 108.0(3) | C(5F)-C(4F)-C(3F)    | 107.7(3) |
| C(9A)-C(4A)-C(8A)    | 107.7(4) | C(9F)-C(4F)-C(8F)    | 108.2(3) |
| C(5A)-C(4A)-C(8A)    | 109.7(4) | C(5F)-C(4F)-C(8F)    | 109.5(3) |
| C(3A)-C(4A)-C(8A)    | 109.9(4) | C(3F)-C(4F)-C(8F)    | 109.7(4) |
| C(6A)-C(5A)-C(4A)    | 112.6(4) | C(6F)-C(5F)-C(4F)    | 112.5(3) |
| C(1A)-C(6A)-C(5A)    | 111.8(4) | C(1F)-C(6F)-C(5F)    | 112.1(4) |
| C(10A)-C(9A)-C(4A)   | 127.5(4) | C(10F)-C(9F)-C(4F)   | 127.8(4) |
| C(9A)-C(10A)-C(11A)  | 126.2(4) | C(9F)-C(10F)-C(11F)  | 125.0(4) |
| C(12A)-C(11A)-C(19A) | 117.4(3) | C(12F)-C(11F)-C(19F) | 117.8(3) |
| C(12A)-C(11A)-C(10A) | 122.6(4) | C(12F)-C(11F)-C(10F) | 122.4(3) |
| C(19A)-C(11A)-C(10A) | 119.9(4) | C(19F)-C(11F)-C(10F) | 119.8(3) |
| C(13A)-C(12A)-C(11A) | 122.3(4) | C(11F)-C(12F)-C(13F) | 122.1(3) |
| C(12A)-C(13A)-C(14A) | 119.0(4) | C(14F)-C(13F)-C(12F) | 118.8(3) |
| C(13A)-C(14A)-C(18A) | 121.4(3) | C(13F)-C(14F)-C(18F) | 121.8(3) |
| C(13A)-C(14A)-N(1A)  | 119.4(3) | C(13F)-C(14F)-N(1F)  | 118.8(3) |
| C(18A)-C(14A)-N(1A)  | 119.2(3) | C(18F)-C(14F)-N(1F)  | 119.4(3) |
| O(2A)-C(15A)-N(1A)   | 122.6(3) | O(5F)-C(15F)-N(1F)   | 122.5(3) |
| O(2A)-C(15A)-C(16A)  | 122.4(3) | O(5F)-C(15F)-C(16F)  | 121.6(3) |
| N(1A)-C(15A)-C(16A)  | 114.9(3) | N(1F)-C(15F)-C(16F)  | 115.7(3) |
| O(3A)-C(16A)-C(15A)  | 107.8(3) | O(4F)-C(16F)-C(15F)  | 107.7(3) |
| O(3A)-C(16A)-C(17A)  | 107.0(3) | O(4F)-C(16F)-C(17F)  | 107.5(3) |
| C(15A)-C(16A)-C(17A) | 112.3(3) | C(15F)-C(16F)-C(17F) | 112.4(3) |
| O(4A)-C(17A)-C(18A)  | 110.6(3) | O(3F)-C(17F)-C(21F)  | 107.0(3) |
| O(4A)-C(17A)-C(21A)  | 108.0(3) | O(3F)-C(17F)-C(18F)  | 111.3(3) |
| C(18A)-C(17A)-C(21A) | 113.9(3) | C(21F)-C(17F)-C(18F) | 115.0(3) |
| O(4A)-C(17A)-C(16A)  | 107.9(3) | O(3F)-C(17F)-C(16F)  | 107.6(3) |
| C(18A)-C(17A)-C(16A) | 108.0(3) | C(21F)-C(17F)-C(16F) | 107.5(3) |
| C(21A)-C(17A)-C(16A) | 108.4(3) | C(18F)-C(17F)-C(16F) | 108.1(3) |
| C(14A)-C(18A)-C(19A) | 118.1(3) | C(14F)-C(18F)-C(19F) | 118.2(3) |
| C(14A)-C(18A)-C(17A) | 118.8(3) | C(14F)-C(18F)-C(17F) | 119.1(3) |
| C(19A)-C(18A)-C(17A) | 123.0(3) | C(19F)-C(18F)-C(17F) | 122.7(3) |
| O(5A)-C(19A)-C(18A)  | 121.5(3) | O(2F)-C(19F)-C(18F)  | 121.9(3) |
| O(5A)-C(19A)-C(11A)  | 116.8(3) | O(2F)-C(19F)-C(11F)  | 117.0(3) |
| C(18A)-C(19A)-C(11A) | 121.7(3) | C(18F)-C(19F)-C(11F) | 121.1(3) |
| C(26A)-C(21A)-C(22A) | 118.6(4) | C(26F)-C(21F)-C(22F) | 117.8(4) |
| C(26A)-C(21A)-C(17A) | 119.2(4) | C(26F)-C(21F)-C(17F) | 122.8(3) |
| C(22A)-C(21A)-C(17A) | 122.1(4) | C(22F)-C(21F)-C(17F) | 119.3(3) |
| C(21A)-C(22A)-C(23A) | 120.2(5) | C(23F)-C(22F)-C(21F) | 121.1(4) |
| C(24A)-C(23A)-C(22A) | 120.1(5) | C(22F)-C(23F)-C(24F) | 120.4(4) |
| C(25A)-C(24A)-C(23A) | 120.4(5) | O(6F)-C(24F)-C(25F)  | 124.1(5) |
| C(25A)-C(24A)-O(6A)  | 124.7(7) | O(6F)-C(24F)-C(23F)  | 115.9(4) |
| C(23A)-C(24A)-O(6A)  | 115.0(7) | C(25F)-C(24F)-C(23F) | 120.0(4) |
| C(24A)-C(25A)-C(26A) | 119.6(5) | C(24F)-C(25F)-C(26F) | 119.0(4) |
| C(21A)-C(26A)-C(25A) | 121.0(5) | C(21F)-C(26F)-C(25F) | 121.6(4) |
| C(15A)-N(1A)-C(14A)  | 123.8(3) | C(15F)-N(1F)-C(14F)  | 123.6(3) |
| C(16A)-O(3A)-C(20A)  | 114.6(3) | C(16F)-O(4F)-C(20F)  | 114.6(3) |
| C(24A)-O(6A)-C(27A)  | 117.3(7) | C(24F)-O(6F)-C(27F)  | 118.3(4) |

## 6. MS/MS fragmentation analysis for aspergillamides related nodes

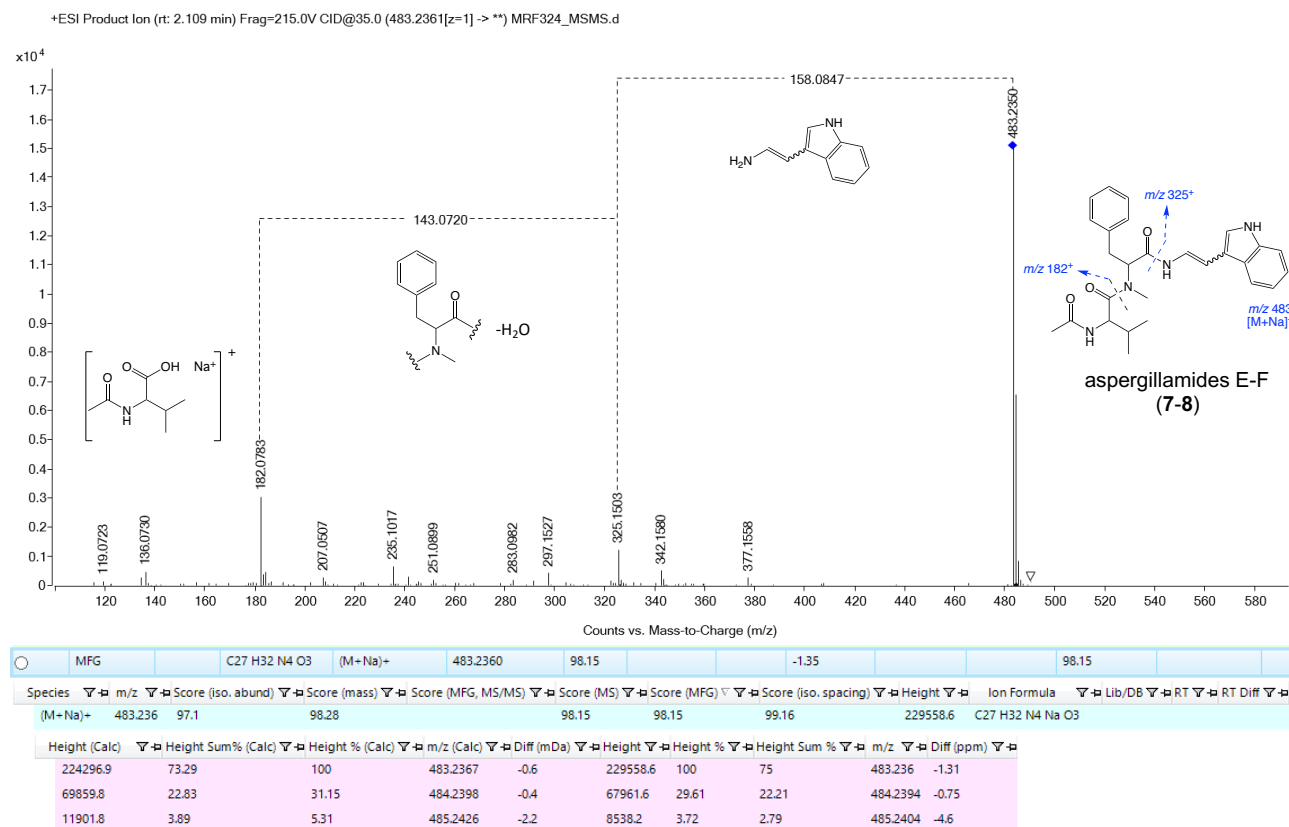

**Figure S58.** MS/MS fragmentation and HRMS analysis for aspergillamides E-F (7-8).

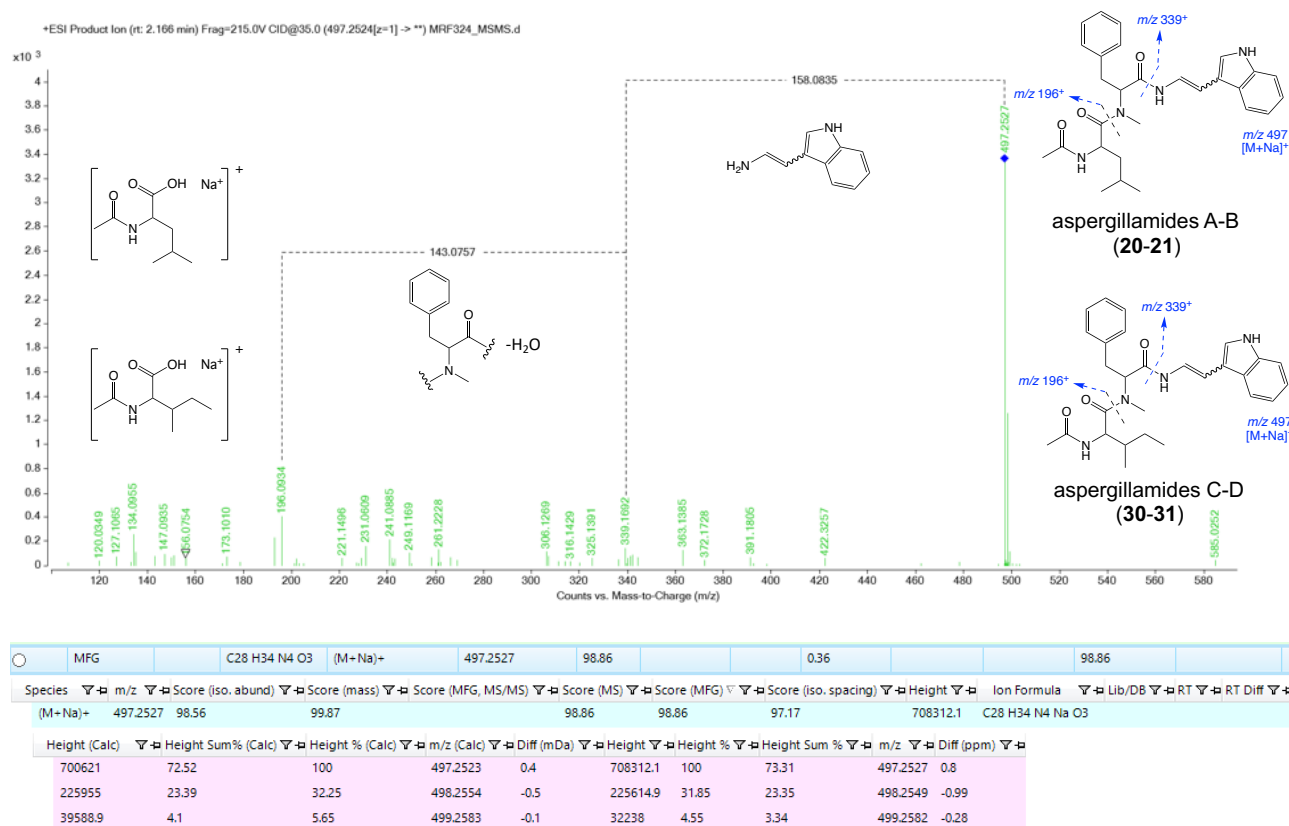

**Figure S59.** MS/MS fragmentation and HRMS analysis for aspergillamides A-D (20-21, 30-31).

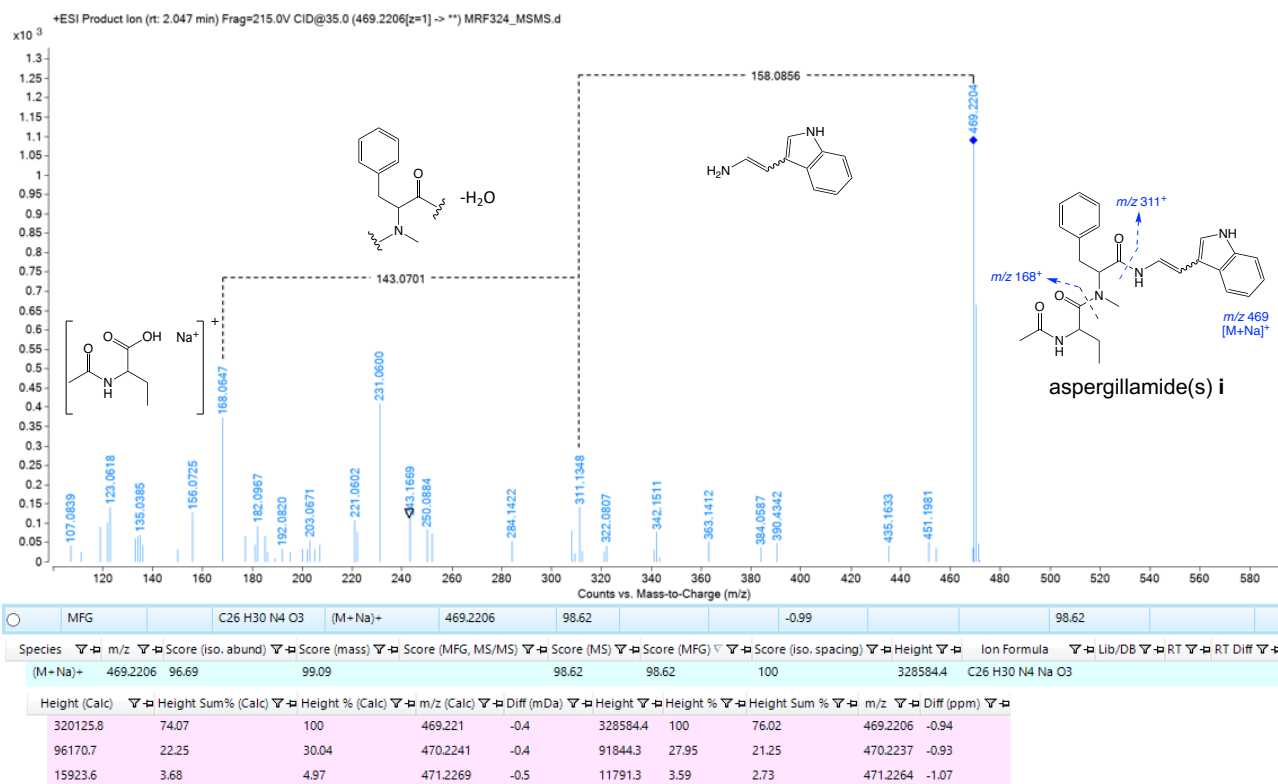

**Figure S60.** MS/MS fragmentation and HRMS analysis for aspergillamide(s) i.

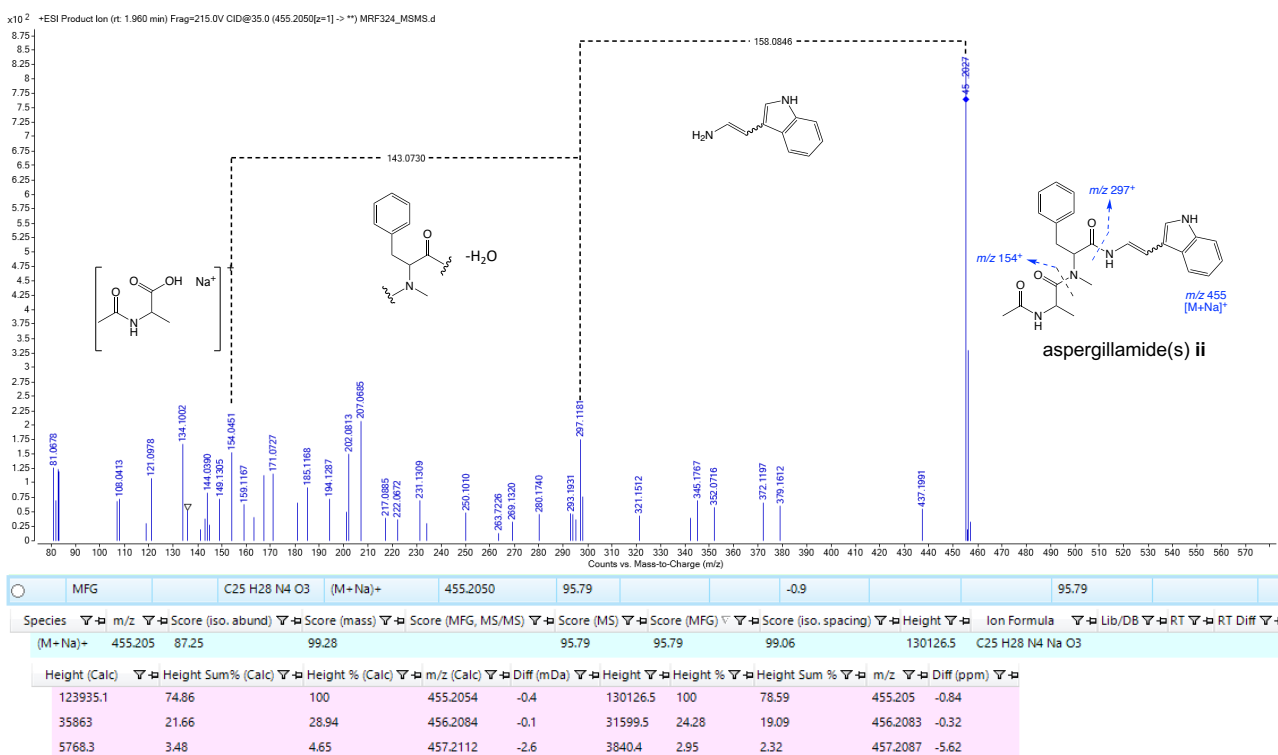

**Figure S61.** MS/MS fragmentation and HRMS analysis for aspergillamide(s) ii.

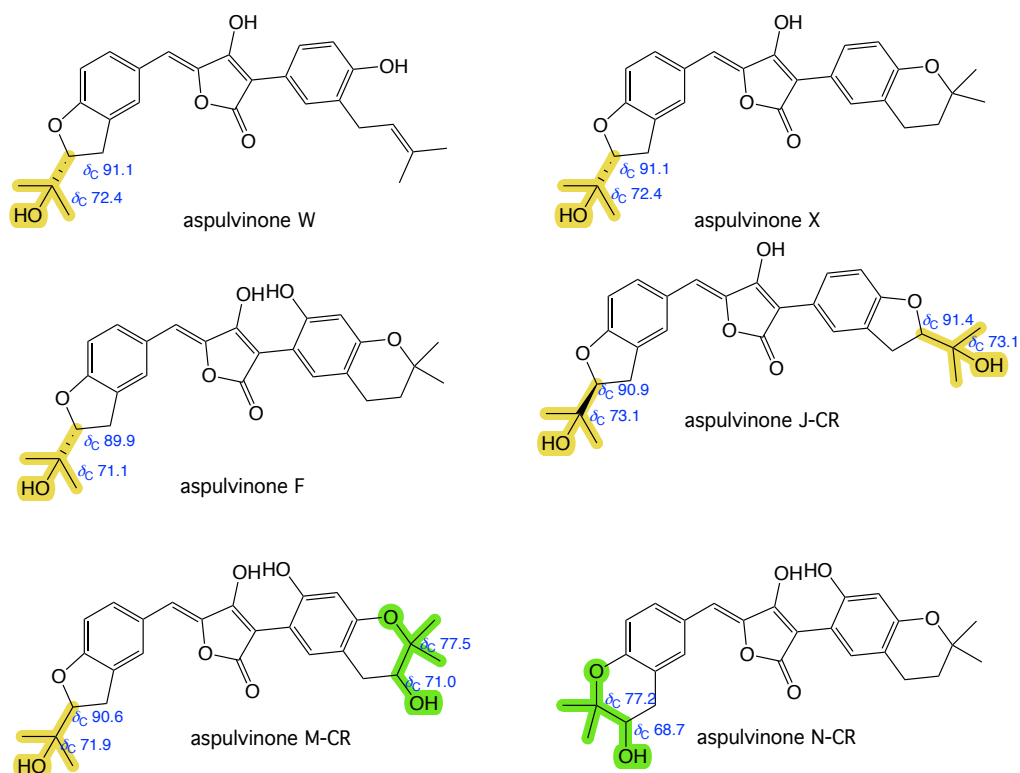

**Figure S62.** Chemical shifts of C-8'' and C-9'' for dihydrobenzofuran (yellow highlight) and dihydrobenzopyran (green highlight) moiety.
